# Supplementary material for: Theoretical insights into NH3 absorption mechanisms with imidazolium-based protic ionic liquids
Source: Royal Society of Chemistry journal article supplement (doi:10.1039/d2im00041e), 2023-01-01
Supplement: d2im00041e1.pdf [file d2im00041e1.pdf]

## Supporting Information

### Theoretical Insights into NH<sub>3</sub> Absorption Mechanisms with Imidazolium-based Protic Ionic Liquids

Wenhui Tu<sup>a</sup>, Shaojuan Zeng<sup>a, b\*</sup>, Yinge Bai<sup>a, b</sup>, Xiaochun Zhang<sup>a</sup>, Haifeng Dong<sup>a, b</sup>,

Xiangping Zhang<sup>a, b, c\*</sup>

<sup>a</sup> *Key Laboratory of Green Process and Engineering, Beijing Key Laboratory of Ionic Liquids Clean Process, Institute of Process Engineering, Chinese Academy of Sciences, Beijing 100190, China*

<sup>b</sup> *Huizhou Institute of Green Energy and Advanced Materials, Huizhou, Guangdong 516081, China*

<sup>c</sup> *College of Chemical Engineering and Environment, China University of Petroleum, Beijing, 102249, China*

#### Corresponding Authors:

Prof. Shaojuan Zeng E-mail: sjzeng@ipe.ac.cn

Prof. Xiangping Zhang E-mail: xpzhang@ipe.ac.cn

## Optimized structures

### [BIm][Tf<sub>2</sub>N]...NH<sub>3</sub> system

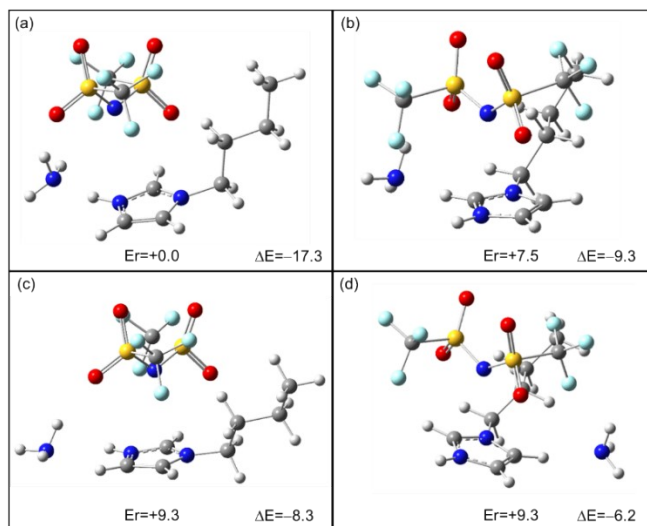

**Fig. S1** Optimized conformers of one NH<sub>3</sub> molecule interacting with [BIm][Tf<sub>2</sub>N], [BIm][Tf<sub>2</sub>N]...NH<sub>3</sub> for short. The calculations were carried at PCM/B3LYP-D3/6-31+G\* level of theory ( $E_r$  represents the relative energy with respect to the most stable conformer,  $\Delta E = E([\text{BIm}][\text{Tf}_2\text{N}] \cdots \text{NH}_3) - E([\text{BIm}][\text{Tf}_2\text{N}]) - E(\text{NH}_3)$ ). All the energies are given in kcal mol<sup>-1</sup>. Color ligand: N, blue; H, gray; C, dark gray; S, yellow; O, red; F, paleturquoise).

## [BIm][Tf<sub>2</sub>N]...2NH<sub>3</sub> system

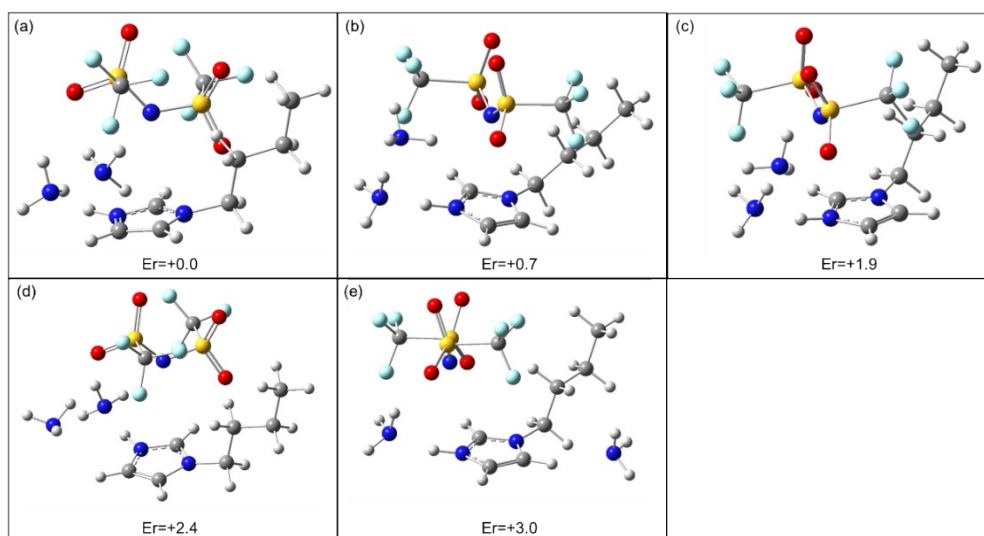

**Fig. S2** Optimized conformers of two NH<sub>3</sub> molecules interacting with [BIm][Tf<sub>2</sub>N], [BIm][Tf<sub>2</sub>N]...2NH<sub>3</sub> for short. The calculations were carried at PCM/B3LYP-D3/6-31+G\* level of theory ( $E_r$  represents the relative energy with respect to the most stable conformer. All the energies are given in kcal mol<sup>-1</sup>. Color ligand: N, blue; H, gray; C, dark gray; S, yellow; O, red; F, paleturquoise).

### [BIm][Tf<sub>2</sub>N]...3NH<sub>3</sub> system

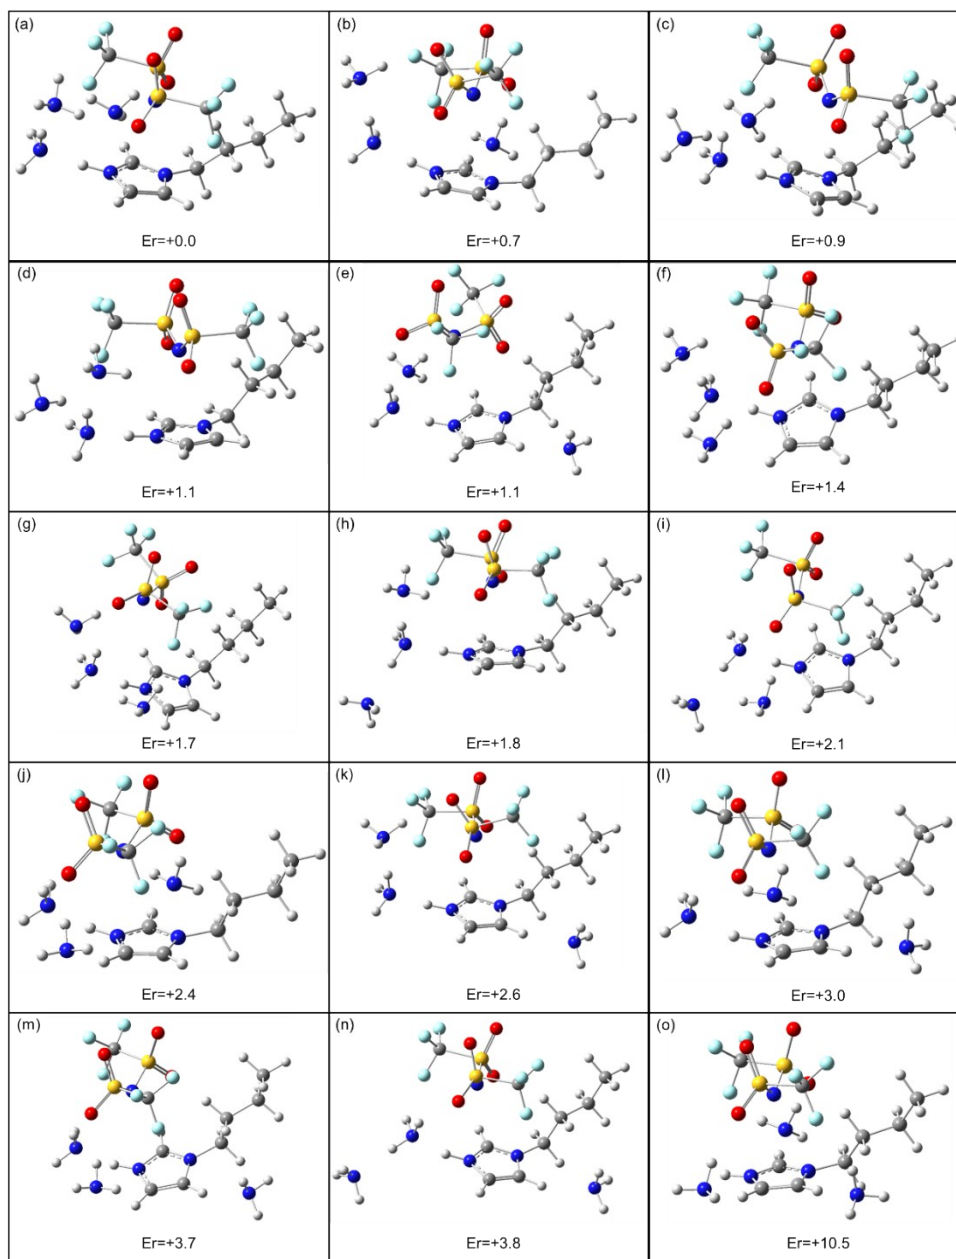

**Fig. S3** Optimized conformers of three NH<sub>3</sub> molecules interacting with [BIm][Tf<sub>2</sub>N], [BIm][Tf<sub>2</sub>N]...3NH<sub>3</sub> for short. The calculations were carried at PCM/B3LYP-D3/6-31+G\* level of theory ( $E_r$  represents the relative energy with respect to the most stable conformer. All the energies given in kcal mol<sup>-1</sup>. Color ligand: N, blue; H, gray; C, dark gray; S, yellow; O, red; F, paleturquoise).

**Table S1.** The relative energy ( $E_r$ ), weighting factors ( $w_i$ ) and the changes of Gibbs energy ( $\Delta G$ ) for the process of  $[\text{BIm}][\text{Tf}_2\text{N}] + 3\text{NH}_3 \rightarrow [\text{BIm}][\text{Tf}_2\text{N}] \cdots 3\text{NH}_3$  for different isomers. The energies are given in  $\text{kcal mol}^{-1}$ .

|            | a     | b     | c     | d     | e     | f     | g     | h     |
|------------|-------|-------|-------|-------|-------|-------|-------|-------|
| $E_r$      | +0.0  | +0.7  | +0.9  | +1.1  | +1.1  | +1.4  | +1.1  | +1.8  |
| $w_i$      | 0.432 | 0.140 | 0.102 | 0.074 | 0.074 | 0.046 | 0.074 | 0.024 |
| $\Delta G$ | -0.05 | +0.56 | +2.87 | +1.77 | +0.44 | +1.28 | +1.57 | +3.84 |
|            | i     | j     | k     | l     | m     | n     | o     |       |
| $E_r$      | +2.1  | +2.4  | +2.6  | +3.0  | +3.7  | +3.8  | +10.5 |       |
| $w_i$      | 0.015 | 0.009 | 0.007 | 0.003 | 0.001 | 0.001 | 0.000 |       |
| $\Delta G$ | +4.6  | +2.24 | +1.29 | +3.07 | +2.11 | +3.29 | +9.48 |       |

**Equation for calculating weighting factors of isomers based on Boltzmann distribution:**

$$w_i = \frac{\exp\left(-\frac{E_i - E_{\min}}{RT}\right)}{\sum_i \exp\left(-\frac{E_i - E_{\min}}{RT}\right)} \quad (\text{S5})$$

Where  $E_i$  denotes the electronic energy ( $\text{J mol}^{-1}$ ) of isomer  $i$ .  $E_{\min}$  is the electronic energy ( $\text{J mol}^{-1}$ ) of the isomer with the lowest electronic energy. R stands for the ideal gas constant ( $\text{J mol}^{-1} \cdot \text{K}^{-1}$ ), and T stands for the absolute temperature (K).

## [BIm][Tf<sub>2</sub>N]...4NH<sub>3</sub> system

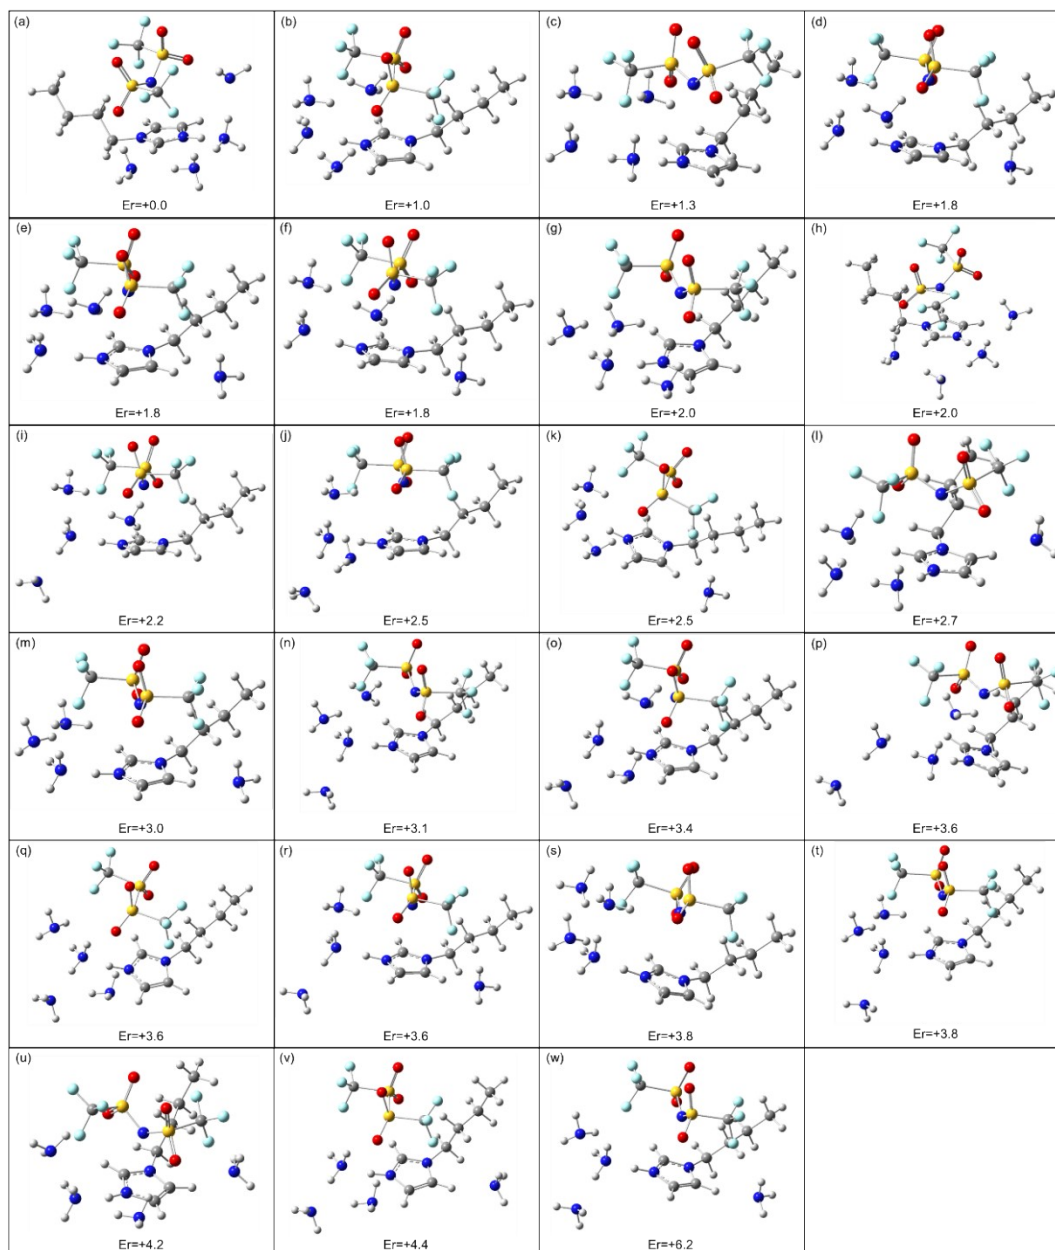

**Fig. S4** Optimized conformers of three NH<sub>3</sub> molecules interacting with [BIm][Tf<sub>2</sub>N], [BIm][Tf<sub>2</sub>N]...4NH<sub>3</sub> for short. The calculations were carried at PCM/B3LYP-D3/6-31+G\* level of theory ( $E_r$  represents the relative energy with respect to the most stable conformer. All the energies are given in kcal mol<sup>-1</sup>. Color ligand: N, blue; H, gray; C, dark gray; S, yellow; O, red; F, pale turquoise).

### [Tf<sub>2</sub>N]<sup>-</sup>...NH<sub>3</sub> system

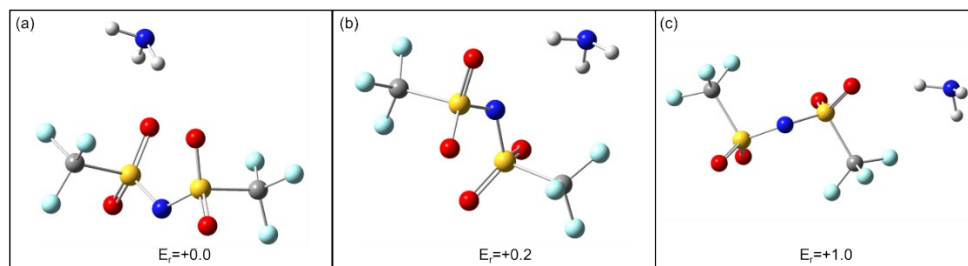

**Fig. S5** Optimized conformers of NH<sub>3</sub> interact with [Tf<sub>2</sub>N]<sup>-</sup>, [Tf<sub>2</sub>N]<sup>-</sup>...NH<sub>3</sub> for short. The calculations were carried at PCM/B3LYP-D3/6-31+G\* level of theory ( $E_r$  represents the relative energy with respect to the most stable conformer. All the energies are given in kcal mol<sup>-1</sup>. Color ligand: N, blue; H, gray; C, dark gray; S, yellow; O, red; F, paleturquoise).

### [SCN]<sup>-</sup>...NH<sub>3</sub> system

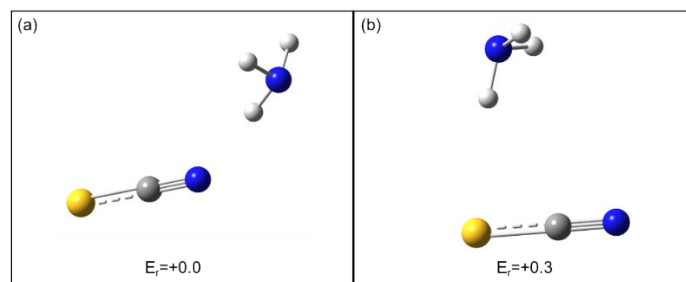

**Fig. S6** Optimized conformers of NH<sub>3</sub> interact with [SCN]<sup>-</sup>, [SCN]<sup>-</sup>...NH<sub>3</sub> for short. The calculations were carried at PCM/B3LYP-D3/6-31+G\* level of theory ( $E_r$  represents the relative energy with respect to the most stable conformer. All the energies are given in kcal mol<sup>-1</sup>. Color ligand: N, blue; H, gray; C, dark gray; S, yellow).

## [BIm][Tf<sub>2</sub>N]

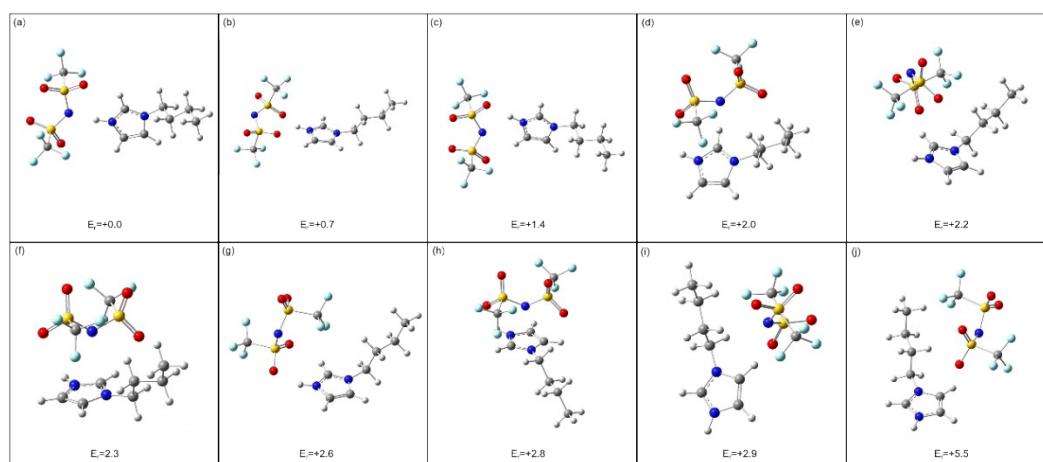

**Fig. S7.** Optimized conformers of [BIm][Tf<sub>2</sub>N]. The calculations were carried at PCM/B3LYP-D3/6-31+G\* level of theory ( $E_r$  represents the relative energy with respect to the most stable conformer. All energies are given in kcal mol<sup>-1</sup>. Color ligand: N, blue; H, gray; C, dark gray; S, yellow; O, red; F, paleturquoise).

## [BIm][SCN]

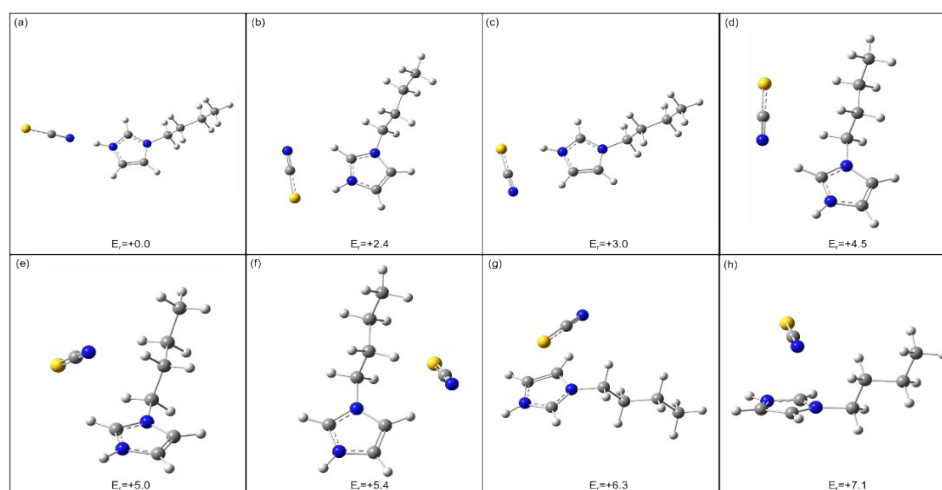

**Fig. S8.** Optimized conformers of [BIm][SCN]. The calculations were carried at PCM B3LYP-D3/6-31+G\* level of theory ( $E_r$  represents the relative energy with respect to the most stable conformer. All the energies are given in kcal mol<sup>-1</sup>. Color ligand: N, blue; H, gray; C, dark gray; S, yellow).



## [BIm][NO<sub>3</sub>]

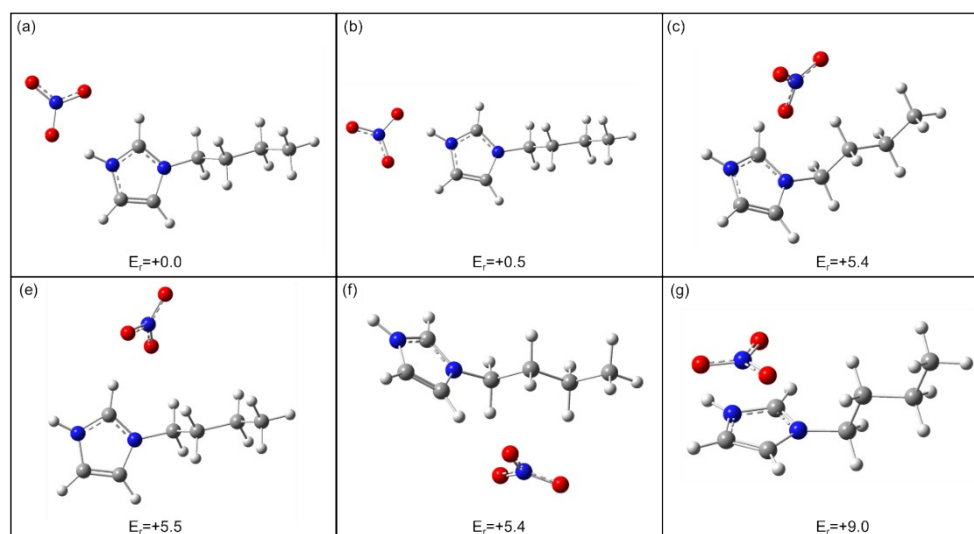

**Fig. S9.** Optimized conformers of [BIm][NO<sub>3</sub>]. The calculations were carried at PCM/B3LYP-D3/6-31+G\* level of theory ( $E_r$  represents the relative energy with respect to the most stable conformer. All energies are given in kcal·mol<sup>-1</sup>. Color ligand: N, blue; H, gray; C, dark gray; O, red).

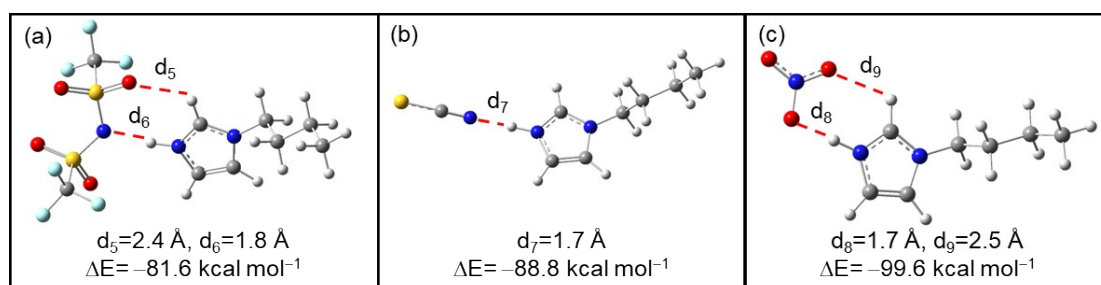

**Fig. S10.** The most stable structures of ILs, (a) [BIm][Tf<sub>2</sub>N], (b) [BIm][SCN], and (c) [BIm][NO<sub>3</sub>]. The interaction energies between cation and anions are considerable, the results are comparable with those of other kinds of ILs<sup>18, 19</sup> (Color ligand: N, blue; H, gray; C, dark gray; S, yellow; O, red; F, pale turquoise).

## Cartesian coordinates

### NH<sub>3</sub>

|   |           |           |           |
|---|-----------|-----------|-----------|
| N | 0.000000  | 0.000000  | 0.115648  |
| H | 0.000000  | 0.944163  | -0.269845 |
| H | -0.817669 | -0.472082 | -0.269845 |
| H | 0.817669  | -0.472082 | -0.269845 |

### [BIm]<sup>+</sup>

|   |           |           |           |
|---|-----------|-----------|-----------|
| N | -0.966158 | -0.174870 | 0.348132  |
| C | -1.799927 | -1.055263 | -0.211705 |
| N | -2.926789 | -0.410773 | -0.534817 |
| C | -2.819122 | 0.917982  | -0.176978 |
| C | -1.581603 | 1.066934  | 0.377590  |
| H | -3.733739 | -0.844685 | -0.969254 |
| C | 0.408182  | -0.463543 | 0.804682  |
| C | 1.458123  | 0.078831  | -0.168371 |
| C | 2.882455  | -0.212079 | 0.322189  |
| C | 3.947444  | 0.324039  | -0.641435 |
| H | -3.616728 | 1.624800  | -0.340722 |
| H | -1.092444 | 1.934620  | 0.791313  |
| H | -1.600121 | -2.103386 | -0.371370 |
| H | 0.487070  | -1.548103 | 0.909924  |
| H | 0.516275  | -0.018950 | 1.797648  |
| H | 1.321482  | 1.161736  | -0.285678 |
| H | 1.299637  | -0.374822 | -1.155367 |
| H | 3.010649  | -1.296174 | 0.447446  |
| H | 3.023932  | 0.236918  | 1.315117  |
| H | 4.956698  | 0.108259  | -0.272436 |
| H | 3.858021  | 1.411040  | -0.761870 |
| H | 3.846583  | -0.133168 | -1.633779 |

### [Tf<sub>2</sub>N]<sup>-</sup>

|   |           |           |           |
|---|-----------|-----------|-----------|
| C | 0.000000  | 2.596315  | -0.036971 |
| F | 1.128351  | 2.385903  | -0.731252 |
| S | -1.013948 | 1.007169  | 0.087487  |
| O | -2.092942 | 1.352016  | 1.024412  |
| N | 0.000000  | 0.000000  | 0.849254  |
| S | 1.013948  | -1.007169 | 0.087487  |
| O | 1.358158  | -0.681185 | -1.304585 |
| O | -1.358158 | 0.681185  | -1.304585 |
| F | -0.723307 | 3.539373  | -0.665229 |
| F | 0.324470  | 3.047978  | 1.184374  |
| C | 0.000000  | -2.596315 | -0.036971 |

|   |           |           |           |
|---|-----------|-----------|-----------|
| F | -1.128351 | -2.385903 | -0.731252 |
| O | 2.092942  | -1.352016 | 1.024412  |
| F | 0.723307  | -3.539373 | -0.665229 |
| F | -0.324470 | -3.047978 | 1.184374  |

**[SCN]<sup>-</sup>**

|   |          |          |           |
|---|----------|----------|-----------|
| N | 0.000000 | 0.000000 | -1.816920 |
| C | 0.000000 | 0.000000 | -0.634254 |
| S | 0.000000 | 0.000000 | 1.032748  |

**[NO<sub>3</sub>]<sup>-</sup>**

|   |           |           |           |
|---|-----------|-----------|-----------|
| N | -0.000100 | -0.000013 | 0.000066  |
| O | 0.732130  | 1.029512  | -0.000019 |
| O | 0.525799  | -1.148598 | -0.000019 |
| O | -1.257841 | 0.119097  | -0.000019 |

**[Blm][Tf<sub>2</sub>N]...NH<sub>3</sub>**

| <b>Fig. S1a</b> |           |           |           | <b>Fig. S1b</b> |           |           |           |
|-----------------|-----------|-----------|-----------|-----------------|-----------|-----------|-----------|
| N               | -2.677401 | -0.797396 | 1.637705  | N               | -0.620415 | 2.201023  | 1.502461  |
| C               | -1.377688 | -0.993844 | 1.900943  | C               | 0.655817  | 1.973633  | 1.823771  |
| N               | -1.087698 | -2.276727 | 1.693167  | N               | 0.665755  | 1.159484  | 2.886184  |
| C               | -2.225875 | -2.930412 | 1.270782  | C               | -0.628010 | 0.841414  | 3.246672  |
| C               | -3.229496 | -2.002855 | 1.233589  | C               | -1.440731 | 1.502747  | 2.375528  |
| H               | -0.092065 | -2.664009 | 1.744139  | H               | 1.505725  | 0.801245  | 3.323894  |
| C               | -3.344667 | 0.516843  | 1.645806  | C               | -1.066901 | 3.014837  | 0.356963  |
| C               | -3.002488 | 1.323719  | 0.390232  | C               | -1.959513 | 2.218339  | -0.596111 |
| C               | -3.676817 | 2.700128  | 0.384949  | C               | -2.284713 | 3.015622  | -1.864129 |
| C               | -3.302722 | 3.515778  | -0.858337 | C               | -3.169626 | 2.219008  | -2.829912 |
| H               | -2.228925 | -3.983108 | 1.035339  | H               | -0.852106 | 0.174500  | 4.062684  |
| H               | -4.269894 | -2.087388 | 0.961215  | H               | -2.515127 | 1.527794  | 2.296367  |
| H               | -0.679743 | -0.223163 | 2.189623  | H               | 1.522417  | 2.393692  | 1.308931  |
| H               | -3.026818 | 1.042105  | 2.550776  | H               | -0.161210 | 3.348926  | -0.153249 |
| H               | -4.418682 | 0.331228  | 1.724805  | H               | -1.586854 | 3.893659  | 0.751262  |
| H               | -3.304184 | 0.752583  | -0.496835 | H               | -2.892058 | 1.938989  | -0.089512 |
| H               | -1.914297 | 1.448351  | 0.338655  | H               | -1.444338 | 1.291792  | -0.861785 |
| H               | -3.383571 | 3.252202  | 1.289000  | H               | -1.346964 | 3.290494  | -2.366674 |
| H               | -4.767845 | 2.576105  | 0.433636  | H               | -2.783878 | 3.956747  | -1.593103 |
| H               | -3.784484 | 4.500420  | -0.846423 | H               | -3.390701 | 2.796878  | -3.734943 |
| H               | -3.612735 | 2.999416  | -1.775659 | H               | -4.124182 | 1.950896  | -2.359297 |
| H               | -2.217855 | 3.670249  | -0.912671 | H               | -2.674631 | 1.288608  | -3.135455 |
| C               | 3.064522  | 1.012439  | 1.050511  | C               | 2.883262  | -0.669168 | -0.527567 |
| F               | 3.872625  | 0.555027  | 0.083894  | F               | 3.023885  | -1.940632 | -0.128218 |
| S               | 1.312577  | 1.242794  | 0.387691  | S               | 1.121874  | -0.347135 | -1.128580 |
| O               | 0.521676  | 1.572764  | 1.585784  | O               | 1.096005  | 1.106541  | -1.359925 |
| N               | 0.917687  | -0.260648 | -0.047293 | N               | 0.240621  | -0.642700 | 0.189941  |

|   |           |           |           |   |           |           |           |
|---|-----------|-----------|-----------|---|-----------|-----------|-----------|
| S | 1.106705  | -0.876592 | -1.528962 | S | -0.401857 | -2.080971 | 0.561911  |
| O | 2.032612  | -0.180890 | -2.432117 | O | 0.130444  | -3.251902 | -0.149952 |
| O | 1.435309  | 2.246012  | -0.676932 | O | 0.946698  | -1.245473 | -2.277429 |
| F | 3.538890  | 2.184419  | 1.497996  | F | 3.749581  | -0.427691 | -1.524659 |
| F | 3.066350  | 0.131059  | 2.065957  | F | 3.180920  | 0.140973  | 0.503415  |
| C | -0.602226 | -0.616316 | -2.285593 | C | -2.165544 | -1.895705 | -0.086051 |
| F | -0.882654 | 0.692097  | -2.370574 | F | -2.154543 | -1.639915 | -1.403228 |
| O | 1.208818  | -2.339220 | -1.393437 | O | -0.559844 | -2.147552 | 2.020833  |
| F | -0.632802 | -1.148270 | -3.517372 | F | -2.843858 | -3.034957 | 0.128053  |
| F | -1.542432 | -1.211520 | -1.535019 | F | -2.801035 | -0.893735 | 0.541050  |
| N | 1.565609  | -3.037788 | 1.619891  | N | 2.932583  | 3.218767  | 0.018994  |
| H | 1.920566  | -3.921432 | 1.982921  | H | 3.890319  | 2.903167  | 0.168346  |
| H | 2.135835  | -2.292464 | 2.018574  | H | 2.988501  | 4.194448  | -0.271172 |
| H | 1.726428  | -3.019931 | 0.611331  | H | 2.569794  | 2.688173  | -0.773550 |

**Fig. S1c**

|   |           |           |           |
|---|-----------|-----------|-----------|
| N | -1.667913 | -0.193706 | -2.224610 |
| C | -0.442591 | -0.053456 | -2.732595 |
| N | -0.180894 | 1.254042  | -2.824960 |
| C | -1.252088 | 1.981953  | -2.345526 |
| C | -2.191401 | 1.066066  | -1.971811 |
| H | 0.698719  | 1.641170  | -3.144796 |
| C | -2.316160 | -1.479116 | -1.904980 |
| C | -2.639938 | -1.594513 | -0.414521 |
| C | -3.163571 | -2.989214 | -0.054548 |
| C | -3.479071 | -3.113686 | 1.440560  |
| H | -1.221601 | 3.063531  | -2.270900 |
| H | -3.172509 | 1.198125  | -1.545640 |
| H | 0.226507  | -0.858096 | -2.988195 |
| H | -1.618575 | -2.262148 | -2.207520 |
| H | -3.218160 | -1.559562 | -2.519221 |
| H | -3.384066 | -0.837976 | -0.134788 |
| H | -1.732778 | -1.380234 | 0.156768  |
| H | -2.411608 | -3.739485 | -0.335525 |
| H | -4.064544 | -3.210686 | -0.644023 |
| H | -3.846465 | -4.116913 | 1.686059  |
| H | -4.246777 | -2.389898 | 1.742613  |
| H | -2.583982 | -2.923717 | 2.046014  |
| C | 3.021807  | -1.043293 | -0.541633 |
| F | 3.706410  | -0.145559 | 0.179930  |
| S | 1.306464  | -1.330221 | 0.193766  |
| O | 0.650455  | -2.195083 | -0.800337 |
| N | 0.624214  | 0.129916  | 0.079885  |
| S | 0.698315  | 1.270276  | 1.223862  |

**Fig. S1d**

|   |           |           |           |
|---|-----------|-----------|-----------|
| N | -1.332635 | -2.041312 | -1.078228 |
| C | -0.116471 | -2.367699 | -1.517525 |
| N | 0.069950  | -1.770756 | -2.698910 |
| C | -1.047007 | -1.023692 | -3.017980 |
| C | -1.936617 | -1.195384 | -1.997915 |
| H | 0.923099  | -1.826959 | -3.242013 |
| C | -1.917861 | -2.470173 | 0.205586  |
| C | -2.293673 | -1.278846 | 1.086417  |
| C | -2.825311 | -1.730599 | 2.450779  |
| C | -3.208443 | -0.538712 | 3.335969  |
| H | -1.104871 | -0.437290 | -3.920421 |
| H | -2.926518 | -0.779398 | -1.828383 |
| H | 0.598637  | -2.980410 | -0.994349 |
| H | -1.169047 | -3.093663 | 0.697846  |
| H | -2.792312 | -3.088280 | -0.020506 |
| H | -3.050092 | -0.671360 | 0.577100  |
| H | -1.409017 | -0.651097 | 1.220975  |
| H | -2.060107 | -2.335073 | 2.957334  |
| H | -3.698677 | -2.383325 | 2.309830  |
| H | -3.582578 | -0.871191 | 4.311330  |
| H | -3.992212 | 0.065944  | 2.861832  |
| H | -2.343090 | 0.113019  | 3.509717  |
| C | 3.289102  | -0.761224 | 0.211873  |
| F | 3.858710  | 0.349164  | -0.276177 |
| S | 1.612963  | -0.371465 | 0.988841  |
| O | 1.054460  | -1.702519 | 1.277411  |
| N | 0.781012  | 0.238314  | -0.252572 |
| S | 0.723203  | 1.806641  | -0.643997 |

|   |           |           |           |   |           |           |           |
|---|-----------|-----------|-----------|---|-----------|-----------|-----------|
| O | 1.727148  | 1.107099  | 2.260292  | O | 1.755125  | 2.674556  | -0.058335 |
| O | 1.550393  | -1.856818 | 1.542856  | O | 1.914588  | 0.529901  | 2.108846  |
| F | 3.703600  | -2.198984 | -0.559428 | F | 4.101650  | -1.297280 | 1.135738  |
| F | 2.912615  | -0.588796 | -1.802760 | F | 3.139996  | -1.644117 | -0.792357 |
| C | -0.938983 | 1.027039  | 2.132849  | C | -0.883974 | 2.359962  | 0.180178  |
| F | -1.034400 | -0.229427 | 2.593680  | F | -0.850102 | 2.103327  | 1.496581  |
| O | 0.550247  | 2.579330  | 0.571724  | O | 0.438185  | 1.907607  | -2.081479 |
| F | -1.005062 | 1.876379  | 3.170412  | F | -1.047456 | 3.680630  | 0.000725  |
| F | -1.975674 | 1.265948  | 1.315304  | F | -1.936823 | 1.721488  | -0.355030 |
| N | -0.552153 | 4.968778  | -1.294114 | N | -4.761643 | 0.277379  | -1.251360 |
| H | -1.277785 | 5.515940  | -0.831558 | H | -5.411678 | -0.097606 | -0.560854 |
| H | 0.167532  | 5.630951  | -1.582975 | H | -5.324394 | 0.553836  | -2.055796 |
| H | -0.134522 | 4.371981  | -0.579072 | H | -4.383685 | 1.137598  | -0.854838 |

**[BIm][Tf<sub>2</sub>N]...2NH<sub>3</sub>**

| <b>Fig. S2a</b> |           |           |           | <b>Fig. S2b</b> |           |           |           |
|-----------------|-----------|-----------|-----------|-----------------|-----------|-----------|-----------|
| N               | 2.913745  | -0.402450 | 1.351568  | N               | 1.116601  | 2.589379  | -0.630301 |
| C               | 2.010131  | 0.561652  | 1.582962  | C               | -0.165125 | 2.704859  | -0.258510 |
| N               | 2.570921  | 1.745830  | 1.341683  | N               | -0.942045 | 2.561724  | -1.330457 |
| C               | 3.871835  | 1.544739  | 0.932093  | C               | -0.141830 | 2.328906  | -2.427642 |
| C               | 4.092716  | 0.195263  | 0.936665  | C               | 1.153618  | 2.347935  | -1.993822 |
| H               | 2.015480  | 2.678698  | 1.340527  | H               | -2.020490 | 2.547372  | -1.313475 |
| C               | 2.636742  | -1.849108 | 1.387027  | C               | 2.277990  | 2.635865  | 0.274059  |
| C               | 2.296138  | -2.385116 | -0.006047 | C               | 3.044587  | 1.312592  | 0.285932  |
| C               | 1.854078  | -3.851779 | 0.035710  | C               | 4.194404  | 1.327313  | 1.299326  |
| C               | 1.461023  | -4.371702 | -1.351912 | C               | 4.949838  | -0.006705 | 1.326894  |
| H               | 4.525086  | 2.364663  | 0.677217  | H               | -0.553215 | 2.165396  | -3.411212 |
| H               | 4.967409  | -0.386731 | 0.691557  | H               | 2.082519  | 2.211649  | -2.523989 |
| H               | 0.987987  | 0.389201  | 1.879194  | H               | -0.501893 | 2.854442  | 0.753982  |
| H               | 1.797723  | -1.996131 | 2.069343  | H               | 1.889593  | 2.861929  | 1.269344  |
| H               | 3.516997  | -2.343232 | 1.807058  | H               | 2.917503  | 3.465639  | -0.043537 |
| H               | 3.165778  | -2.270273 | -0.666943 | H               | 3.439658  | 1.103841  | -0.716431 |
| H               | 1.490995  | -1.776098 | -0.430570 | H               | 2.344169  | 0.509262  | 0.528742  |
| H               | 0.997868  | -3.945721 | 0.717379  | H               | 3.792730  | 1.542710  | 2.299301  |
| H               | 2.661302  | -4.469913 | 0.453426  | H               | 4.890106  | 2.143381  | 1.057897  |
| H               | 1.145703  | -5.420864 | -1.307361 | H               | 5.765442  | 0.013341  | 2.059146  |
| H               | 2.302656  | -4.302467 | -2.053143 | H               | 5.383387  | -0.233569 | 0.344491  |
| H               | 0.629833  | -3.784816 | -1.760966 | H               | 4.276523  | -0.831199 | 1.592686  |
| C               | -3.129969 | -0.895404 | 0.904743  | C               | -2.221571 | -0.146694 | 1.914293  |
| F               | -3.886756 | -0.334339 | -0.046614 | F               | -2.917043 | -1.156717 | 1.368240  |
| S               | -1.327315 | -1.003493 | 0.347513  | S               | -0.367243 | -0.395246 | 1.656216  |
| O               | -0.610640 | -1.434566 | 1.558727  | O               | 0.219461  | 0.852077  | 2.170930  |
| N               | -0.912492 | 0.543138  | 0.091085  | N               | -0.233742 | -0.364469 | 0.047716  |

|                 |           |           |           |                 |           |           |           |
|-----------------|-----------|-----------|-----------|-----------------|-----------|-----------|-----------|
| S               | -1.075419 | 1.310925  | -1.329352 | S               | -0.327475 | -1.663936 | -0.907247 |
| O               | -2.103646 | 0.793760  | -2.241796 | O               | -0.893843 | -2.885411 | -0.317433 |
| O               | -1.345146 | -1.886445 | -0.824860 | O               | -0.054492 | -1.659386 | 2.335414  |
| F               | -3.588517 | -2.131937 | 1.154311  | F               | -2.493759 | -0.094826 | 3.227029  |
| F               | -3.228110 | -0.163208 | 2.024525  | F               | -2.620324 | 1.003909  | 1.345746  |
| C               | 0.559266  | 0.959800  | -2.212518 | C               | 1.491338  | -2.070275 | -1.206317 |
| F               | 0.714971  | -0.354258 | -2.422149 | F               | 2.119631  | -2.275905 | -0.038850 |
| O               | -1.018081 | 2.752788  | -1.048878 | O               | -0.812776 | -1.225831 | -2.225725 |
| F               | 0.561800  | 1.591879  | -3.396668 | F               | 1.584989  | -3.183589 | -1.950846 |
| F               | 1.594427  | 1.405627  | -1.484331 | F               | 2.100784  | -1.066630 | -1.854252 |
| N               | 0.961807  | 3.941045  | 1.225526  | N               | -3.683833 | 2.403052  | -1.277316 |
| H               | 1.291234  | 4.871036  | 1.480898  | H               | -4.174785 | 2.943565  | -1.989382 |
| H               | 0.158368  | 3.698117  | 1.825213  | H               | -4.090686 | 2.661024  | -0.378436 |
| H               | 0.597095  | 3.988124  | 0.273347  | H               | -3.892591 | 1.403125  | -1.439397 |
| N               | -1.445043 | 2.634912  | 2.536817  | N               | -3.950752 | -0.589397 | -1.749707 |
| H               | -2.338827 | 3.113498  | 2.428276  | H               | -4.609621 | -0.991044 | -2.415781 |
| H               | -1.500859 | 2.115223  | 3.412177  | H               | -4.088093 | -1.083829 | -0.868887 |
| H               | -1.392648 | 1.943229  | 1.786508  | H               | -3.013164 | -0.832709 | -2.072460 |
| <b>Fig. S2c</b> |           |           |           | <b>Fig. S2d</b> |           |           |           |
| N               | -2.184822 | 1.005317  | 1.769297  | N               | -2.716207 | -0.094385 | -1.709471 |
| C               | -0.928977 | 1.394332  | 2.029927  | C               | -1.458036 | 0.258164  | -2.008301 |
| N               | -0.395482 | 0.535257  | 2.898946  | N               | -1.371378 | 1.586913  | -1.991668 |
| C               | -1.318826 | -0.446626 | 3.190121  | C               | -2.602522 | 2.114808  | -1.665021 |
| C               | -2.450116 | -0.152374 | 2.485366  | C               | -3.452571 | 1.059245  | -1.485045 |
| H               | 0.633233  | 0.510814  | 3.149289  | H               | -0.448479 | 2.106540  | -2.122873 |
| C               | -3.063866 | 1.616602  | 0.760717  | C               | -3.171128 | -1.480689 | -1.507161 |
| C               | -3.121761 | 0.766638  | -0.512089 | C               | -2.765556 | -2.003772 | -0.126108 |
| C               | -3.951898 | 1.436609  | -1.612208 | C               | -3.208220 | -3.453845 | 0.097970  |
| C               | -4.003489 | 0.588701  | -2.888669 | C               | -2.768314 | -3.981914 | 1.468633  |
| H               | -1.093339 | -1.266297 | 3.853405  | H               | -2.746424 | 3.178397  | -1.559466 |
| H               | -3.401646 | -0.656344 | 2.422011  | H               | -4.497228 | 1.020813  | -1.218151 |
| H               | -0.455810 | 2.275458  | 1.600138  | H               | -0.646383 | -0.430373 | -2.185560 |
| H               | -2.659691 | 2.610020  | 0.549951  | H               | -2.733807 | -2.090243 | -2.302781 |
| H               | -4.054651 | 1.739655  | 1.208273  | H               | -4.256136 | -1.486102 | -1.637215 |
| H               | -3.545057 | -0.217619 | -0.271931 | H               | -3.197584 | -1.354238 | 0.646001  |
| H               | -2.098536 | 0.601978  | -0.865707 | H               | -1.675447 | -1.934116 | -0.030561 |
| H               | -3.519934 | 2.420837  | -1.842155 | H               | -2.785926 | -4.088545 | -0.693708 |
| H               | -4.972402 | 1.620043  | -1.246878 | H               | -4.301225 | -3.523741 | 0.006097  |
| H               | -4.592861 | 1.081640  | -3.670760 | H               | -3.084889 | -5.021397 | 1.613576  |
| H               | -4.457069 | -0.391003 | -2.691377 | H               | -3.200673 | -3.381308 | 2.278994  |
| H               | -2.994329 | 0.416262  | -3.283505 | H               | -1.676513 | -3.943191 | 1.570403  |
| N               | 2.353194  | 0.234517  | 3.185284  | N               | 1.158960  | 2.702794  | -2.151520 |
| H               | 2.852528  | 0.872844  | 2.566737  | H               | 1.366973  | 3.551645  | -2.675644 |

|   |           |           |           |   |           |           |           |
|---|-----------|-----------|-----------|---|-----------|-----------|-----------|
| H | 2.393979  | -0.690624 | 2.755410  | H | 1.810075  | 1.982511  | -2.462817 |
| H | 2.871418  | 0.194456  | 4.061731  | H | 1.369360  | 2.878368  | -1.168245 |
| N | 0.028577  | 4.053496  | 0.519170  | N | -1.317555 | 4.545034  | 0.101357  |
| H | -0.599840 | 4.833757  | 0.330277  | H | -0.886528 | 5.419260  | 0.402077  |
| H | 0.099328  | 3.507592  | -0.340247 | H | -0.669639 | 3.801751  | 0.365024  |
| H | 0.949802  | 4.455859  | 0.688118  | H | -2.146076 | 4.422374  | 0.683642  |
| C | 2.654119  | 1.336811  | -0.791222 | C | 3.275761  | -1.010927 | -0.876516 |
| F | 3.576192  | 0.396380  | -0.539078 | F | 4.013847  | -0.341826 | 0.019850  |
| S | 1.042356  | 0.544071  | -1.373447 | S | 1.529961  | -1.291440 | -0.215748 |
| O | 0.109006  | 1.677340  | -1.472954 | O | 0.812399  | -1.883549 | -1.357606 |
| N | 0.618748  | -0.333462 | -0.088450 | N | 0.988118  | 0.221159  | -0.039713 |
| S | 0.999153  | -1.890567 | 0.122152  | S | 1.065822  | 1.072888  | 1.329150  |
| O | 2.067974  | -2.441247 | -0.723230 | O | 2.031178  | 0.634210  | 2.344359  |
| O | 1.401263  | -0.177715 | -2.601159 | O | 1.702227  | -2.091921 | 1.002606  |
| F | 3.122606  | 2.163940  | -1.737914 | F | 3.858474  | -2.192987 | -1.125951 |
| F | 2.449181  | 2.045407  | 0.334527  | F | 3.233319  | -0.301062 | -2.016815 |
| C | -0.570678 | -2.754071 | -0.472384 | C | -0.628836 | 0.754613  | 2.096117  |
| F | -0.794252 | -2.463684 | -1.763132 | F | -0.798853 | -0.555535 | 2.320805  |
| O | 1.037301  | -2.156996 | 1.568294  | O | 1.021994  | 2.501270  | 0.966527  |
| F | -0.425501 | -4.083317 | -0.345679 | F | -0.726696 | 1.413719  | 3.260553  |
| F | -1.634022 | -2.366730 | 0.246085  | F | -1.600693 | 1.182538  | 1.274822  |

**Fig. S2e**

|   |           |           |           |
|---|-----------|-----------|-----------|
| N | 2.168250  | 0.863421  | 1.700722  |
| C | 0.904209  | 1.235157  | 1.938146  |
| N | 0.735405  | 2.479858  | 1.495614  |
| C | 1.920437  | 2.919288  | 0.938057  |
| C | 2.828706  | 1.905603  | 1.065390  |
| H | -0.220270 | 2.941177  | 1.435963  |
| C | 2.713691  | -0.484119 | 1.927400  |
| C | 2.637519  | -1.333894 | 0.657033  |
| C | 3.161219  | -2.756247 | 0.881850  |
| C | 3.068343  | -3.609295 | -0.388744 |
| H | 2.015179  | 3.901229  | 0.501452  |
| H | 3.861505  | 1.788221  | 0.754586  |
| H | 0.145240  | 0.603371  | 2.369948  |
| H | 2.135097  | -0.937139 | 2.736504  |
| H | 3.745612  | -0.365811 | 2.267533  |
| H | 3.212401  | -0.842590 | -0.138102 |
| H | 1.594290  | -1.371431 | 0.324829  |
| H | 2.584876  | -3.231872 | 1.687680  |
| H | 4.204549  | -2.714784 | 1.226082  |
| H | 3.444384  | -4.624240 | -0.214619 |
| H | 3.655848  | -3.166541 | -1.203231 |

|   |           |           |           |
|---|-----------|-----------|-----------|
| H | 2.029110  | -3.687958 | -0.731517 |
| N | -1.872000 | 3.328976  | 1.088400  |
| H | -2.505378 | 2.668888  | 1.538862  |
| H | -1.919889 | 3.141064  | 0.085428  |
| H | -2.241029 | 4.264557  | 1.252515  |
| N | 5.716932  | 0.701846  | 0.067244  |
| H | 5.867452  | -0.240914 | 0.425695  |
| H | 6.599215  | 1.198844  | 0.188579  |
| H | 5.577163  | 0.606255  | -0.938532 |
| C | 0.470995  | 0.160951  | -2.374247 |
| F | 0.654325  | -1.161325 | -2.239951 |
| S | -1.210310 | 0.660449  | -1.678372 |
| O | -1.192049 | 2.131584  | -1.731092 |
| N | -1.073394 | 0.222767  | -0.129577 |
| S | -1.586337 | -1.177735 | 0.488214  |
| O | -1.790365 | -2.294108 | -0.443562 |
| O | -2.190462 | -0.065288 | -2.497201 |
| F | 0.532850  | 0.477612  | -3.677092 |
| F | 1.455893  | 0.800306  | -1.726173 |
| C | -3.314320 | -0.725424 | 1.098433  |
| F | -4.083420 | -0.325717 | 0.075936  |
| O | -0.826831 | -1.416378 | 1.726724  |
| F | -3.883664 | -1.790573 | 1.681720  |
| F | -3.244039 | 0.271869  | 1.998581  |

**[BIm][Tf<sub>2</sub>N]...3NH<sub>3</sub>**

| <b>Fig. S3a</b> |           |           |           | <b>Fig. S3b</b> |           |           |           |
|-----------------|-----------|-----------|-----------|-----------------|-----------|-----------|-----------|
| N               | -0.883591 | 1.965464  | 1.748919  | N               | 1.775950  | -1.733679 | 1.784436  |
| C               | 0.423446  | 2.145382  | 1.510879  | C               | 0.564192  | -2.186612 | 1.432759  |
| N               | 1.115619  | 1.376820  | 2.352959  | N               | -0.318562 | -1.790402 | 2.350399  |
| C               | 0.235830  | 0.670223  | 3.143536  | C               | 0.335535  | -1.049752 | 3.311244  |
| C               | -1.024579 | 1.040225  | 2.770565  | C               | 1.655005  | -1.011605 | 2.961693  |
| H               | 2.181249  | 1.278552  | 2.347297  | H               | -1.378139 | -1.933124 | 2.278707  |
| C               | -1.975246 | 2.599876  | 0.992390  | C               | 2.993181  | -1.859041 | 0.967665  |
| C               | -2.906052 | 1.568210  | 0.352842  | C               | 3.294214  | -0.562028 | 0.211069  |
| C               | -3.944677 | 2.226839  | -0.561571 | C               | 4.518966  | -0.697974 | -0.699529 |
| C               | -4.875017 | 1.194518  | -1.208927 | C               | 4.812307  | 0.599974  | -1.461538 |
| H               | 0.571812  | -0.037928 | 3.884087  | H               | -0.186104 | -0.604892 | 4.143418  |
| H               | -1.991212 | 0.724286  | 3.128240  | H               | 2.504549  | -0.540015 | 3.430216  |
| H               | 0.837753  | 2.813115  | 0.757665  | H               | 0.378692  | -2.791609 | 0.549933  |
| H               | -1.500894 | 3.215167  | 0.224657  | H               | 2.823214  | -2.686313 | 0.273977  |
| H               | -2.521924 | 3.260480  | 1.673406  | H               | 3.815185  | -2.135228 | 1.635139  |
| H               | -3.418823 | 0.993639  | 1.134856  | H               | 3.454381  | 0.249701  | 0.933179  |



|                 |           |           |           |                 |           |           |           |
|-----------------|-----------|-----------|-----------|-----------------|-----------|-----------|-----------|
| H               | -2.299443 | 0.862468  | -0.220735 | H               | 2.414914  | -0.292703 | -0.382177 |
| H               | -3.425995 | 2.796509  | -1.345307 | H               | 4.348589  | -1.514005 | -1.416251 |
| H               | -4.537860 | 2.952631  | 0.012924  | H               | 5.396796  | -0.984100 | -0.102678 |
| H               | -5.610496 | 1.676870  | -1.863433 | H               | 5.684754  | 0.489708  | -2.116377 |
| H               | -5.423168 | 0.626204  | -0.446520 | H               | 5.013593  | 1.425849  | -0.767274 |
| H               | -4.303692 | 0.478117  | -1.812537 | H               | 3.956221  | 0.888967  | -2.084128 |
| C               | 2.176647  | 0.263775  | -1.760917 | C               | -1.969066 | -1.082028 | -1.667117 |
| F               | 2.771206  | -0.938069 | -1.693187 | F               | -3.027152 | -0.378659 | -1.243410 |
| S               | 0.299693  | 0.081725  | -1.652915 | S               | -0.433704 | 0.014066  | -1.756771 |
| O               | -0.186788 | 1.470474  | -1.642920 | O               | 0.636379  | -0.915975 | -2.152844 |
| N               | 0.096485  | -0.517101 | -0.169189 | N               | -0.187479 | 0.413159  | -0.212282 |
| S               | 0.022238  | -2.092714 | 0.179978  | S               | -0.771322 | 1.750327  | 0.482718  |
| O               | 0.493720  | -3.028520 | -0.851012 | O               | -1.958997 | 2.353478  | -0.147050 |
| O               | -0.057890 | -0.779365 | -2.787994 | O               | -0.806959 | 1.092301  | -2.682277 |
| F               | 2.506535  | 0.843918  | -2.925900 | F               | -2.236562 | -1.578689 | -2.885877 |
| F               | 2.636794  | 1.026781  | -0.756204 | F               | -1.770177 | -2.108222 | -0.822034 |
| C               | -1.840167 | -2.385717 | 0.276685  | C               | 0.614622  | 3.001809  | 0.202112  |
| F               | -2.420128 | -2.060870 | -0.888912 | F               | 0.827834  | 3.190724  | -1.107647 |
| O               | 0.487297  | -2.278474 | 1.563164  | O               | -0.774899 | 1.548109  | 1.935782  |
| F               | -2.076307 | -3.682764 | 0.531505  | F               | 0.274632  | 4.175799  | 0.759785  |
| F               | -2.390899 | -1.648813 | 1.252509  | F               | 1.753406  | 2.570881  | 0.766057  |
| N               | 3.856198  | 1.005019  | 2.234558  | N               | -3.061570 | -2.065581 | 2.075066  |
| H               | 3.947503  | 0.013456  | 1.958107  | H               | -3.549698 | -2.424949 | 2.895565  |
| H               | 4.390055  | 1.141303  | 3.092627  | H               | -3.281032 | -2.698055 | 1.305496  |
| H               | 4.306239  | 1.568895  | 1.513738  | H               | -3.483194 | -1.150013 | 1.844358  |
| N               | 3.708542  | -1.916576 | 1.383870  | N               | -4.334122 | 0.652013  | 1.393494  |
| H               | 4.278382  | -2.665053 | 1.776519  | H               | -5.166158 | 0.519431  | 0.819223  |
| H               | 3.794086  | -1.986391 | 0.370382  | H               | -3.696394 | 1.238053  | 0.854302  |
| H               | 2.735724  | -2.134668 | 1.604272  | H               | -4.623940 | 1.202409  | 2.201368  |
| N               | 1.461944  | 4.010729  | -0.899603 | N               | 0.761878  | -3.903134 | -1.289333 |
| H               | 2.443208  | 3.877647  | -1.142098 | H               | -0.059629 | -4.397237 | -1.636613 |
| H               | 1.229035  | 4.972538  | -1.144442 | H               | 1.571047  | -4.460593 | -1.561536 |
| H               | 0.924570  | 3.402945  | -1.518394 | H               | 0.814344  | -3.024468 | -1.806329 |
| <b>Fig. S3c</b> |           |           |           | <b>Fig. S3d</b> |           |           |           |
| N               | 0.004187  | 2.232417  | 1.416895  | N               | 0.638681  | 2.743980  | -0.733957 |
| C               | 1.197893  | 1.627073  | 1.343484  | C               | -0.652443 | 2.437147  | -0.539194 |
| N               | 1.335291  | 0.822356  | 2.396496  | N               | -1.218840 | 2.156571  | -1.710107 |
| C               | 0.194105  | 0.892934  | 3.163655  | C               | -0.261346 | 2.268958  | -2.695135 |
| C               | -0.645264 | 1.782060  | 2.555078  | C               | 0.907595  | 2.637988  | -2.088733 |
| H               | 2.176907  | 0.167142  | 2.536944  | H               | -2.269548 | 1.818412  | -1.826850 |
| C               | -0.552094 | 3.153448  | 0.412904  | C               | 1.613804  | 3.063928  | 0.321803  |
| C               | -1.855142 | 2.624739  | -0.189431 | C               | 2.714143  | 2.006879  | 0.418853  |
| C               | -2.350278 | 3.510558  | -1.337658 | C               | 3.664526  | 2.274614  | 1.591136  |

|                 |           |           |           |                 |           |           |           |
|-----------------|-----------|-----------|-----------|-----------------|-----------|-----------|-----------|
| C               | -3.653755 | 2.982827  | -1.948325 | C               | 4.755729  | 1.203401  | 1.701174  |
| H               | 0.067952  | 0.304685  | 4.058514  | H               | -0.484156 | 2.078779  | -3.733652 |
| H               | -1.632517 | 2.123204  | 2.821747  | H               | 1.888843  | 2.833532  | -2.491550 |
| H               | 1.925204  | 1.769750  | 0.555707  | H               | -1.133820 | 2.393071  | 0.424141  |
| H               | 0.207608  | 3.264889  | -0.363501 | H               | 1.054152  | 3.118937  | 1.257629  |
| H               | -0.700194 | 4.127131  | 0.891062  | H               | 2.027902  | 4.054247  | 0.107315  |
| H               | -2.627259 | 2.564962  | 0.588283  | H               | 3.283071  | 1.976905  | -0.519464 |
| H               | -1.682186 | 1.608003  | -0.551590 | H               | 2.242009  | 1.028348  | 0.538368  |
| H               | -1.574543 | 3.560648  | -2.114512 | H               | 3.085133  | 2.306090  | 2.524460  |
| H               | -2.498809 | 4.537955  | -0.975816 | H               | 4.126419  | 3.265348  | 1.474610  |
| H               | -3.993565 | 3.620345  | -2.772980 | H               | 5.424584  | 1.403128  | 2.546513  |
| H               | -4.453716 | 2.947173  | -1.197744 | H               | 5.365506  | 1.167689  | 0.789289  |
| H               | -3.518104 | 1.966910  | -2.340207 | H               | 4.314225  | 0.209701  | 1.845940  |
| C               | 1.942652  | -1.370783 | -1.463349 | C               | -2.029647 | -0.862653 | 1.725708  |
| F               | 1.847488  | -2.668987 | -1.142198 | F               | -2.342158 | -2.047941 | 1.178088  |
| S               | 0.232839  | -0.571183 | -1.505443 | S               | -0.173145 | -0.540407 | 1.611079  |
| O               | 0.523263  | 0.855285  | -1.733672 | O               | -0.038285 | 0.845114  | 2.088213  |
| N               | -0.264153 | -0.721550 | 0.019416  | N               | 0.078525  | -0.526901 | 0.016743  |
| S               | -1.130292 | -1.962273 | 0.591155  | S               | 0.439529  | -1.829045 | -0.869518 |
| O               | -1.165036 | -3.181888 | -0.229537 | O               | 0.190602  | -3.142400 | -0.258283 |
| O               | -0.504059 | -1.309124 | -2.539957 | O               | 0.451669  | -1.621118 | 2.385067  |
| F               | 2.518806  | -1.262832 | -2.672179 | F               | -2.411792 | -0.866592 | 3.012090  |
| F               | 2.724834  | -0.759753 | -0.559823 | F               | -2.706662 | 0.099283  | 1.077528  |
| C               | -2.888162 | -1.277412 | 0.498786  | C               | 2.318189  | -1.711704 | -1.010897 |
| F               | -3.179309 | -0.905831 | -0.757813 | F               | 2.876973  | -1.701034 | 0.208923  |
| O               | -0.865597 | -2.082266 | 2.030686  | O               | -0.032926 | -1.586954 | -2.241906 |
| F               | -3.759931 | -2.224309 | 0.882802  | F               | 2.782165  | -2.772203 | -1.690820 |
| F               | -3.027425 | -0.213676 | 1.304259  | F               | 2.675754  | -0.594178 | -1.660022 |
| N               | 3.545242  | -0.799209 | 2.522404  | N               | -3.749729 | 1.275461  | -1.876116 |
| H               | 4.029630  | -0.929512 | 3.410000  | H               | -4.306569 | 1.623026  | -2.656724 |
| H               | 4.187726  | -0.314793 | 1.872352  | H               | -4.236076 | 1.531201  | -1.003757 |
| H               | 3.359074  | -1.727232 | 2.143141  | H               | -3.716001 | 0.246149  | -1.944600 |
| N               | 5.121855  | 0.838979  | 0.502689  | N               | -4.923371 | 2.084615  | 0.877529  |
| H               | 5.855384  | 1.469233  | 0.826278  | H               | -5.681131 | 2.758160  | 0.985724  |
| H               | 4.429897  | 1.412107  | 0.007919  | H               | -4.131923 | 2.446133  | 1.408863  |
| H               | 5.550676  | 0.231968  | -0.195696 | H               | -5.220305 | 1.231445  | 1.350002  |
| N               | 3.100226  | 2.529645  | -1.346780 | N               | -3.274065 | -1.757592 | -2.046080 |
| H               | 3.851739  | 2.497145  | -2.036296 | H               | -3.336477 | -2.176369 | -1.118755 |
| H               | 2.816417  | 3.507834  | -1.288482 | H               | -2.284898 | -1.768134 | -2.298521 |
| H               | 2.314930  | 2.017054  | -1.750796 | H               | -3.751794 | -2.392004 | -2.685151 |
| <b>Fig. S3e</b> |           |           |           | <b>Fig. S3f</b> |           |           |           |
| N               | 2.590141  | 0.450280  | 1.340765  | N               | -1.180973 | 2.771613  | -0.381383 |
| C               | 1.455156  | 1.111822  | 1.607738  | C               | 0.002218  | 2.494116  | -0.943865 |

|   |           |           |           |   |           |           |           |
|---|-----------|-----------|-----------|---|-----------|-----------|-----------|
| N | 1.649758  | 2.408478  | 1.370077  | N | 0.970130  | 2.756165  | -0.067399 |
| C | 2.943683  | 2.587712  | 0.924158  | C | 0.398841  | 3.199265  | 1.106420  |
| C | 3.543173  | 1.358249  | 0.903851  | C | -0.953897 | 3.213729  | 0.913324  |
| H | 0.853476  | 3.135962  | 1.391057  | H | 2.012856  | 2.539232  | -0.220485 |
| C | 2.761878  | -1.010905 | 1.385593  | C | -2.497204 | 2.504431  | -0.983671 |
| C | 2.684093  | -1.623376 | -0.014217 | C | -3.192478 | 1.324319  | -0.300873 |
| C | 2.789578  | -3.151714 | 0.024260  | C | -4.502125 | 0.942359  | -0.998510 |
| C | 2.698518  | -3.770129 | -1.375369 | C | -5.176375 | -0.260593 | -0.328181 |
| H | 3.325269  | 3.562086  | 0.661063  | H | 1.007271  | 3.430566  | 1.967175  |
| H | 4.532493  | 1.015292  | 0.618632  | H | -1.764959 | 3.489331  | 1.568765  |
| H | 0.532646  | 0.652783  | 1.924049  | H | 0.132062  | 2.091078  | -1.934655 |
| H | 1.972303  | -1.408746 | 2.025380  | H | -2.323476 | 2.291088  | -2.041023 |
| H | 3.728757  | -1.211612 | 1.854394  | H | -3.091219 | 3.420572  | -0.911588 |
| H | 3.487818  | -1.205513 | -0.634096 | H | -3.389453 | 1.573363  | 0.750320  |
| H | 1.734649  | -1.333288 | -0.478138 | H | -2.505827 | 0.473619  | -0.305205 |
| H | 1.984576  | -3.551730 | 0.656101  | H | -4.293990 | 0.706395  | -2.051594 |
| H | 3.737229  | -3.443587 | 0.499259  | H | -5.188220 | 1.801296  | -0.998616 |
| H | 2.771975  | -4.863203 | -1.332471 | H | -6.107966 | -0.530572 | -0.839260 |
| H | 3.506476  | -3.402775 | -2.021169 | H | -5.417140 | -0.043251 | 0.720299  |
| H | 1.744405  | -3.513636 | -1.851921 | H | -4.515741 | -1.136663 | -0.343960 |
| C | -3.024875 | -1.785957 | 0.823659  | C | 1.612251  | -0.976009 | -2.240174 |
| F | -3.897094 | -1.482030 | -0.145462 | F | 2.507524  | -1.614609 | -1.476721 |
| S | -1.267243 | -1.307873 | 0.318065  | S | -0.130621 | -1.128128 | -1.524279 |
| O | -0.481352 | -1.523351 | 1.544027  | O | -0.931303 | -0.257493 | -2.399180 |
| N | -1.353583 | 0.296833  | 0.100776  | N | -0.027049 | -0.383885 | -0.093585 |
| S | -1.721079 | 1.012777  | -1.308145 | S | 0.394404  | -1.096732 | 1.290709  |
| O | -2.530285 | 0.229293  | -2.250923 | O | 1.266398  | -2.278662 | 1.180791  |
| O | -0.979670 | -2.123300 | -0.868336 | O | -0.397465 | -2.572621 | -1.508657 |
| F | -3.071983 | -3.107626 | 1.053992  | F | 1.631393  | -1.510732 | -3.471051 |
| F | -3.379229 | -1.139061 | 1.944328  | F | 1.969027  | 0.317763  | -2.329909 |
| C | -0.046891 | 1.200573  | -2.166616 | C | -1.239805 | -1.752240 | 1.977368  |
| F | 0.519891  | 0.004637  | -2.374146 | F | -1.793261 | -2.635732 | 1.137286  |
| O | -2.111213 | 2.396810  | -1.001065 | O | 0.762073  | -0.040640 | 2.244275  |
| F | -0.229428 | 1.806374  | -3.350816 | F | -1.011815 | -2.355588 | 3.155314  |
| F | 0.783110  | 1.948190  | -1.424298 | F | -2.099958 | -0.740842 | 2.169101  |
| N | -0.560781 | 4.024102  | 1.312197  | N | 3.621765  | 2.097915  | -0.432478 |
| H | -0.539978 | 5.013440  | 1.555473  | H | 4.254940  | 2.776330  | -0.009307 |
| H | -1.227687 | 3.544381  | 1.934876  | H | 3.891585  | 2.014946  | -1.412392 |
| H | -0.948474 | 3.940519  | 0.371552  | H | 3.805830  | 1.184689  | 0.013920  |
| N | -2.401474 | 2.004034  | 2.656537  | N | 4.190097  | -0.623399 | 0.902353  |
| H | -3.405265 | 2.177264  | 2.610727  | H | 4.808223  | -1.137166 | 0.274665  |
| H | -2.242234 | 1.457825  | 3.502627  | H | 3.352671  | -1.195517 | 1.011650  |
| H | -2.174587 | 1.396133  | 1.866871  | H | 4.651035  | -0.608116 | 1.811677  |
| N | 6.161636  | -0.441110 | 0.023616  | N | 2.996627  | 2.110665  | 2.882954  |

|                 |           |           |           |                 |           |           |           |
|-----------------|-----------|-----------|-----------|-----------------|-----------|-----------|-----------|
| H               | 6.067605  | -1.388188 | 0.390123  | H               | 3.061551  | 2.046578  | 3.898915  |
| H               | 7.104701  | -0.134123 | 0.261259  | H               | 3.914327  | 1.852776  | 2.522142  |
| H               | 6.133995  | -0.523674 | -0.992476 | H               | 2.358559  | 1.370412  | 2.587402  |
| <b>Fig. S3g</b> |           |           |           | <b>Fig. S3h</b> |           |           |           |
| N               | -1.825740 | -2.120902 | -1.387244 | N               | -0.123555 | 2.798777  | -0.477754 |
| C               | -1.613539 | -0.837769 | -1.711924 | C               | 0.950958  | 2.139579  | -0.935662 |
| N               | -2.750300 | -0.161013 | -1.549407 | N               | 1.887651  | 2.115673  | 0.009008  |
| C               | -3.725911 | -1.024797 | -1.097004 | C               | 1.399879  | 2.766679  | 1.121589  |
| C               | -3.148394 | -2.259614 | -0.994673 | C               | 0.137511  | 3.199326  | 0.822422  |
| H               | -2.819859 | 0.904726  | -1.648210 | H               | 2.859504  | 1.583694  | -0.077211 |
| C               | -0.785872 | -3.161954 | -1.320709 | C               | -1.387217 | 2.990054  | -1.208225 |
| C               | -0.315189 | -3.389948 | 0.118515  | C               | -2.548701 | 2.254064  | -0.538797 |
| C               | 0.887297  | -4.338270 | 0.180784  | C               | -3.841289 | 2.361715  | -1.354969 |
| C               | 1.391027  | -4.535188 | 1.615019  | C               | -5.005011 | 1.619439  | -0.687295 |
| H               | -4.718563 | -0.674197 | -0.858741 | H               | 1.980981  | 2.866912  | 2.025255  |
| H               | -3.549672 | -3.210757 | -0.681335 | H               | -0.585552 | 3.746976  | 1.406087  |
| H               | -0.664699 | -0.427340 | -2.016541 | H               | 1.017697  | 1.677852  | -1.907094 |
| H               | 0.042537  | -2.822013 | -1.944318 | H               | -1.224806 | 2.608646  | -2.218375 |
| H               | -1.200511 | -4.073957 | -1.758779 | H               | -1.578456 | 4.066003  | -1.271652 |
| H               | -1.144199 | -3.789975 | 0.717743  | H               | -2.712108 | 2.659315  | 0.468229  |
| H               | -0.039830 | -2.425086 | 0.558382  | H               | -2.268101 | 1.204114  | -0.420461 |
| H               | 1.696087  | -3.926460 | -0.437903 | H               | -3.669273 | 1.948695  | -2.358748 |
| H               | 0.616126  | -5.309168 | -0.257476 | H               | -4.106375 | 3.419757  | -1.492079 |
| H               | 2.253873  | -5.211103 | 1.642854  | H               | -5.920067 | 1.693889  | -1.286512 |
| H               | 0.607576  | -4.962550 | 2.253991  | H               | -5.217764 | 2.034466  | 0.306276  |
| H               | 1.697487  | -3.576557 | 2.051007  | H               | -4.768721 | 0.555699  | -0.560539 |
| C               | 3.385786  | 0.890089  | -0.677138 | C               | 1.131702  | -1.845484 | -1.925907 |
| F               | 3.629214  | 1.817259  | 0.256869  | F               | 1.532158  | -2.795948 | -1.066981 |
| S               | 1.881252  | -0.155754 | -0.211329 | S               | -0.560367 | -1.171005 | -1.429003 |
| O               | 1.644476  | -0.976122 | -1.410291 | O               | -0.768387 | -0.047278 | -2.355890 |
| N               | 0.667167  | 0.917793  | -0.143558 | N               | -0.266747 | -0.545449 | 0.030126  |
| S               | 0.252351  | 1.751468  | 1.184334  | S               | -0.413837 | -1.352383 | 1.422384  |
| O               | 1.311150  | 1.972630  | 2.177801  | O               | -0.488687 | -2.817992 | 1.339770  |
| O               | 2.251503  | -0.815821 | 1.046349  | O               | -1.464513 | -2.326296 | -1.499509 |
| F               | 4.457651  | 0.089807  | -0.788102 | F               | 1.066300  | -2.375034 | -3.156864 |
| F               | 3.179773  | 1.503066  | -1.852688 | F               | 2.043939  | -0.858794 | -1.928787 |
| C               | -0.984648 | 0.620535  | 2.060290  | C               | -2.122747 | -0.815249 | 2.018658  |
| F               | -0.408898 | -0.534449 | 2.415625  | F               | -3.051666 | -1.106630 | 1.095171  |
| O               | -0.569559 | 2.887501  | 0.742222  | O               | 0.505640  | -0.746417 | 2.398544  |
| F               | -1.437912 | 1.239290  | 3.161651  | F               | -2.423441 | -1.463363 | 3.155409  |
| F               | -2.029121 | 0.351469  | 1.259439  | F               | -2.148395 | 0.504097  | 2.256577  |
| N               | -2.611302 | 2.588575  | -1.720718 | N               | 4.192997  | 0.750625  | -0.177763 |
| H               | -3.338738 | 3.198344  | -2.092333 | H               | 5.011453  | 1.240141  | 0.214341  |

|                 |           |           |           |                 |           |           |           |
|-----------------|-----------|-----------|-----------|-----------------|-----------|-----------|-----------|
| H               | -1.780748 | 2.674474  | -2.327293 | H               | 4.418343  | 0.493627  | -1.138941 |
| H               | -2.324479 | 2.957423  | -0.812847 | H               | 4.050846  | -0.124300 | 0.351581  |
| N               | 0.164650  | 2.469642  | -2.942728 | N               | 3.447631  | -1.737548 | 1.462980  |
| H               | 0.654290  | 3.362010  | -3.003761 | H               | 4.052506  | -2.160213 | 2.166262  |
| H               | 0.529440  | 1.890207  | -3.698232 | H               | 3.147849  | -2.490968 | 0.845108  |
| H               | 0.461477  | 2.033696  | -2.067379 | H               | 2.609061  | -1.412428 | 1.946113  |
| N               | -5.132401 | 1.457804  | 0.494478  | N               | 6.590999  | 2.286574  | 1.056343  |
| H               | -4.436470 | 1.159327  | 1.177397  | H               | 7.472145  | 1.781089  | 0.968669  |
| H               | -5.785150 | 2.063680  | 0.990909  | H               | 6.442042  | 2.439284  | 2.053446  |
| H               | -4.638402 | 2.048569  | -0.173721 | H               | 6.740244  | 3.205564  | 0.640664  |
| <b>Fig. S3i</b> |           |           |           | <b>Fig. S3j</b> |           |           |           |
| N               | -1.018247 | 2.463845  | -1.678059 | N               | -1.928031 | -1.396365 | 1.730789  |
| C               | -0.099061 | 1.507517  | -1.875045 | C               | -1.299396 | -0.321079 | 2.225939  |
| N               | 1.071818  | 1.935930  | -1.409560 | N               | -0.092691 | -0.699770 | 2.648856  |
| C               | 0.911062  | 3.199895  | -0.881398 | C               | 0.076041  | -2.046919 | 2.403796  |
| C               | -0.403461 | 3.536715  | -1.048982 | C               | -1.081801 | -2.490656 | 1.831067  |
| H               | 1.953441  | 1.319655  | -1.360962 | H               | 0.667643  | -0.028096 | 2.950200  |
| C               | -2.460364 | 2.306746  | -1.929438 | C               | -3.247787 | -1.383445 | 1.081960  |
| C               | -3.146076 | 1.556539  | -0.783359 | C               | -3.136384 | -1.639120 | -0.423875 |
| C               | -4.645352 | 1.361855  | -1.034256 | C               | -4.499581 | -1.546024 | -1.119309 |
| C               | -5.322279 | 0.591882  | 0.105966  | C               | -4.396975 | -1.798719 | -2.628002 |
| H               | 1.735883  | 3.708943  | -0.403937 | H               | 1.003289  | -2.562472 | 2.618072  |
| H               | -0.954286 | 4.424008  | -0.778103 | H               | -1.374029 | -3.468603 | 1.482368  |
| H               | -0.299982 | 0.534152  | -2.294124 | H               | -1.729389 | 0.677148  | 2.263023  |
| H               | -2.573910 | 1.768934  | -2.874879 | H               | -3.685338 | -0.401778 | 1.279715  |
| H               | -2.877181 | 3.308512  | -2.060960 | H               | -3.870782 | -2.139597 | 1.570004  |
| H               | -2.989711 | 2.109003  | 0.152052  | H               | -2.701474 | -2.633227 | -0.594365 |
| H               | -2.661564 | 0.580007  | -0.666101 | H               | -2.447512 | -0.902375 | -0.851048 |
| H               | -4.788046 | 0.819963  | -1.979793 | H               | -4.928202 | -0.549418 | -0.942181 |
| H               | -5.128094 | 2.341485  | -1.158839 | H               | -5.194161 | -2.269582 | -0.669121 |
| H               | -6.392182 | 0.453044  | -0.088731 | H               | -5.378029 | -1.722491 | -3.111478 |
| H               | -5.219159 | 1.128038  | 1.057912  | H               | -3.997270 | -2.800147 | -2.832810 |
| H               | -4.869709 | -0.399800 | 0.231061  | H               | -3.729033 | -1.068776 | -3.102446 |
| C               | 0.606347  | -3.208898 | -1.029164 | N               | 2.008399  | 1.082715  | 3.075681  |
| F               | 1.334822  | -3.630262 | 0.014827  | H               | 2.566102  | 1.137417  | 3.926746  |
| S               | -0.701764 | -1.972313 | -0.461319 | H               | 1.741761  | 2.034512  | 2.826012  |
| O               | -1.283614 | -1.471628 | -1.717768 | H               | 2.610461  | 0.734621  | 2.327821  |
| N               | 0.205213  | -0.789483 | 0.155959  | N               | -2.988077 | 2.405843  | 1.961413  |
| S               | 0.625720  | -0.652317 | 1.707266  | H               | -4.001139 | 2.475075  | 2.052888  |
| O               | 0.470122  | -1.840413 | 2.556598  | H               | -2.778337 | 2.351253  | 0.964293  |
| O               | -1.559105 | -2.721300 | 0.465934  | H               | -2.605193 | 3.290801  | 2.292295  |
| F               | 0.012896  | -4.267486 | -1.601206 | N               | 3.068107  | -3.397976 | 1.934966  |
| F               | 1.429531  | -2.639412 | -1.925637 | H               | 2.744652  | -4.099708 | 1.269229  |

|                 |           |           |           |                 |           |           |           |
|-----------------|-----------|-----------|-----------|-----------------|-----------|-----------|-----------|
| C               | -0.652769 | 0.576708  | 2.350594  | H               | 4.025234  | -3.652268 | 2.178213  |
| F               | -1.890143 | 0.083006  | 2.196161  | H               | 3.115854  | -2.516109 | 1.422882  |
| O               | 1.894700  | 0.094064  | 1.763772  | C               | 1.671953  | -1.700976 | -1.594496 |
| F               | -0.436966 | 0.807839  | 3.655171  | F               | 0.880417  | -1.429190 | -2.642254 |
| F               | -0.564214 | 1.738117  | 1.685881  | S               | 2.093348  | -0.110090 | -0.670204 |
| N               | 3.201023  | 0.223402  | -1.134391 | O               | 2.790187  | -0.576064 | 0.542212  |
| H               | 4.152867  | 0.611353  | -1.137494 | N               | 0.633145  | 0.418707  | -0.231383 |
| H               | 3.175531  | -0.567771 | -1.776506 | S               | -0.201807 | 1.552596  | -1.020498 |
| H               | 3.013258  | -0.143116 | -0.200742 | O               | 0.138688  | 1.784685  | -2.430223 |
| N               | 6.040360  | 1.563363  | -1.039580 | O               | 2.845397  | 0.700199  | -1.637359 |
| H               | 6.169703  | 2.544990  | -1.284761 | F               | 2.802482  | -2.272863 | -2.039363 |
| H               | 6.498576  | 1.024206  | -1.774767 | F               | 1.040420  | -2.565804 | -0.787698 |
| H               | 6.581795  | 1.403090  | -0.190192 | C               | 0.334777  | 3.125951  | -0.124933 |
| N               | 3.572497  | 2.821358  | 0.983813  | F               | 1.657398  | 3.308678  | -0.246001 |
| H               | 2.959582  | 2.072326  | 1.308458  | O               | -1.617824 | 1.404254  | -0.651845 |
| H               | 4.080488  | 3.155140  | 1.802554  | F               | -0.301815 | 4.185400  | -0.646686 |
| H               | 4.262316  | 2.383239  | 0.371861  | F               | 0.031942  | 3.045222  | 1.183500  |
| <b>Fig. S3k</b> |           |           |           | <b>Fig. S3l</b> |           |           |           |
| N               | 1.718253  | 2.238137  | 0.356326  | N               | 1.890359  | -1.396000 | 1.484909  |
| C               | 0.412981  | 2.484840  | 0.522592  | C               | 0.632852  | -1.594072 | 1.903252  |
| N               | -0.092239 | 2.924078  | -0.628765 | N               | 0.348504  | -0.666584 | 2.818796  |
| C               | 0.914799  | 2.944352  | -1.572495 | C               | 1.439835  | 0.164195  | 2.975353  |
| C               | 2.059140  | 2.515539  | -0.959797 | C               | 2.419528  | -0.293449 | 2.142068  |
| H               | -1.135133 | 3.104414  | -0.806709 | H               | -0.624227 | -0.474280 | 3.180657  |
| C               | 2.615998  | 1.647110  | 1.360806  | C               | 2.550132  | -2.122130 | 0.390412  |
| C               | 2.982205  | 0.205915  | 1.001999  | C               | 2.634688  | -1.259058 | -0.871491 |
| C               | 3.892202  | -0.435782 | 2.053868  | C               | 3.302829  | -1.999536 | -2.034210 |
| C               | 4.249652  | -1.882735 | 1.694122  | C               | 3.378760  | -1.132893 | -3.296827 |
| H               | 0.733920  | 3.253950  | -2.589936 | H               | 1.420344  | 1.008857  | 3.645449  |
| H               | 3.076303  | 2.367990  | -1.309762 | H               | 3.424606  | 0.050999  | 1.921818  |
| H               | -0.134694 | 2.316908  | 1.435042  | H               | -0.023964 | -2.387915 | 1.552728  |
| H               | 2.094041  | 1.686808  | 2.319716  | H               | 1.967519  | -3.028995 | 0.208591  |
| H               | 3.505677  | 2.280968  | 1.425064  | H               | 3.544892  | -2.417447 | 0.737400  |
| H               | 3.477887  | 0.193945  | 0.023550  | H               | 3.195160  | -0.345034 | -0.640752 |
| H               | 2.058344  | -0.370469 | 0.901927  | H               | 1.621130  | -0.956630 | -1.153732 |
| H               | 3.390569  | -0.412460 | 3.031529  | H               | 2.741241  | -2.919001 | -2.252354 |
| H               | 4.811799  | 0.157977  | 2.159275  | H               | 4.314592  | -2.313655 | -1.739615 |
| H               | 4.894566  | -2.336035 | 2.456134  | H               | 3.851175  | -1.674434 | -4.124873 |
| H               | 4.778261  | -1.929042 | 0.733283  | H               | 3.962525  | -0.221851 | -3.112700 |
| H               | 3.345467  | -2.498306 | 1.606596  | H               | 2.376205  | -0.826668 | -3.621150 |
| C               | -2.671060 | 0.103832  | 1.645422  | N               | -2.265566 | 0.132576  | 3.369447  |
| F               | -3.545575 | -0.394830 | 0.763204  | H               | -2.706266 | 0.258359  | 4.279497  |
| S               | -0.992832 | -0.754896 | 1.505895  | H               | -2.918159 | -0.390274 | 2.786333  |

|   |           |           |           |   |           |           |           |
|---|-----------|-----------|-----------|---|-----------|-----------|-----------|
| O | -0.167646 | -0.035578 | 2.489861  | H | -2.159514 | 1.054257  | 2.942676  |
| N | -0.455876 | -0.324415 | 0.046029  | N | -1.060580 | -4.033794 | 0.647825  |
| S | -0.769503 | -1.108368 | -1.329974 | H | -0.662713 | -4.946762 | 0.429871  |
| O | -2.003096 | -1.913786 | -1.355788 | H | -1.093956 | -3.502778 | -0.222941 |
| O | -1.288744 | -2.177973 | 1.719937  | H | -2.026713 | -4.196369 | 0.929285  |
| F | -3.156833 | -0.074216 | 2.884351  | N | 5.395638  | 0.368035  | 0.860738  |
| F | -2.540286 | 1.424351  | 1.422975  | H | 6.174542  | 0.676062  | 1.442598  |
| C | 0.634470  | -2.366865 | -1.446697 | H | 5.246820  | 1.101423  | 0.167823  |
| F | 0.618121  | -3.202012 | -0.399267 | H | 5.725788  | -0.448995 | 0.347450  |
| O | -0.504664 | -0.189491 | -2.443596 | C | 0.737940  | 2.580762  | -0.587353 |
| F | 0.493811  | -3.082160 | -2.575159 | F | 0.803692  | 2.215002  | -1.876669 |
| F | 1.819841  | -1.739366 | -1.480041 | S | -0.894073 | 2.006574  | 0.168732  |
| N | -2.800135 | 3.269576  | -1.082218 | O | -0.750684 | 2.296850  | 1.603813  |
| H | -3.023411 | 3.984568  | -1.774920 | N | -0.809059 | 0.404021  | -0.025517 |
| H | -3.298047 | 3.526195  | -0.229697 | S | -1.466705 | -0.399999 | -1.259612 |
| H | -3.209004 | 2.381038  | -1.417090 | O | -1.750808 | 0.355224  | -2.487196 |
| N | -4.054981 | 0.650713  | -2.111747 | O | -1.929224 | 2.719371  | -0.593885 |
| H | -5.000037 | 0.542475  | -1.744676 | F | 0.818855  | 3.919680  | -0.511835 |
| H | -3.546110 | -0.196482 | -1.860014 | F | 1.781072  | 2.049061  | 0.064253  |
| H | -4.136315 | 0.649554  | -3.128120 | C | -3.164312 | -0.861643 | -0.572873 |
| N | 5.220862  | 1.710718  | -1.461946 | F | -3.879225 | 0.240463  | -0.306204 |
| H | 5.666743  | 1.541050  | -0.560596 | O | -0.771307 | -1.691721 | -1.375334 |
| H | 5.849695  | 2.320703  | -1.983980 | F | -3.830009 | -1.607489 | -1.467689 |
| H | 5.214803  | 0.816308  | -1.951913 | F | -3.033383 | -1.571463 | 0.563417  |

**Fig. S3m**

|   |           |           |           |
|---|-----------|-----------|-----------|
| N | -2.098601 | -0.143458 | -1.931054 |
| C | -0.873727 | 0.261229  | -2.288828 |
| N | -0.839386 | 1.592389  | -2.256181 |
| C | -2.072570 | 2.063128  | -1.848541 |
| C | -2.872240 | 0.973614  | -1.644239 |
| H | 0.060417  | 2.146442  | -2.356156 |
| C | -2.499601 | -1.539255 | -1.698001 |
| C | -2.428277 | -1.888266 | -0.209785 |
| C | -2.804606 | -3.348100 | 0.063053  |
| C | -2.710428 | -3.694264 | 1.553704  |
| H | -2.251769 | 3.117507  | -1.705466 |
| H | -3.891835 | 0.855913  | -1.292694 |
| H | -0.046845 | -0.392621 | -2.512736 |
| H | -1.826812 | -2.172683 | -2.281198 |
| H | -3.513361 | -1.660753 | -2.088592 |
| H | -3.094675 | -1.217242 | 0.346736  |
| H | -1.409622 | -1.696951 | 0.143480  |
| H | -2.139025 | -4.007849 | -0.510906 |

**Fig. S3n**

|   |           |           |           |
|---|-----------|-----------|-----------|
| N | -1.667267 | 1.740073  | -1.476811 |
| C | -0.337471 | 1.663863  | -1.618780 |
| N | 0.229878  | 2.613906  | -0.879169 |
| C | -0.763653 | 3.313159  | -0.221907 |
| C | -1.961994 | 2.770659  | -0.595347 |
| H | 1.291316  | 2.644137  | -0.685332 |
| C | -2.637712 | 0.786973  | -2.035719 |
| C | -3.042461 | -0.265927 | -1.001593 |
| C | -4.026368 | -1.289385 | -1.576460 |
| C | -4.417674 | -2.353319 | -0.544016 |
| H | -0.537518 | 4.125923  | 0.450723  |
| H | -2.990664 | 2.977167  | -0.319232 |
| H | 0.176712  | 0.915740  | -2.199602 |
| H | -2.167578 | 0.318961  | -2.904298 |
| H | -3.501643 | 1.361327  | -2.380785 |
| H | -3.487319 | 0.235888  | -0.133474 |
| H | -2.137903 | -0.774743 | -0.651625 |
| H | -3.574783 | -1.775483 | -2.452634 |

|   |           |           |           |   |           |           |           |
|---|-----------|-----------|-----------|---|-----------|-----------|-----------|
| H | -3.824216 | -3.539709 | -0.300320 | H | -4.927393 | -0.771734 | -1.935614 |
| H | -2.976362 | -4.741897 | 1.736823  | H | -5.118240 | -3.081680 | -0.969038 |
| H | -3.386807 | -3.065403 | 2.146705  | H | -4.896798 | -1.895068 | 0.330682  |
| H | -1.691572 | -3.533234 | 1.927454  | H | -3.533941 | -2.899948 | -0.191811 |
| N | 1.652872  | 2.816964  | -2.178015 | C | 2.683775  | -1.816591 | -1.198269 |
| H | 1.858666  | 3.735911  | -2.567599 | F | 3.448813  | -1.946967 | -0.105327 |
| H | 2.386983  | 2.183397  | -2.493451 | S | 0.855990  | -1.773004 | -0.728058 |
| H | 1.733525  | 2.882012  | -1.161848 | O | 0.177705  | -1.456705 | -1.996051 |
| N | -1.308602 | 4.496303  | 0.238069  | N | 0.778268  | -0.456504 | 0.199942  |
| H | -1.018050 | 5.330708  | 0.747723  | S | 0.919658  | -0.432633 | 1.807978  |
| H | -0.593410 | 3.789005  | 0.411873  | O | 1.531692  | -1.606836 | 2.445284  |
| H | -2.156880 | 4.163811  | 0.696516  | O | 0.594487  | -3.070102 | -0.090526 |
| N | -5.656923 | -0.116744 | -0.254052 | F | 2.916642  | -2.852008 | -2.019101 |
| H | -6.574234 | 0.248389  | -0.509784 | F | 3.029156  | -0.680691 | -1.831019 |
| H | -5.525226 | 0.103556  | 0.733054  | C | -0.885762 | -0.470484 | 2.356416  |
| H | -5.726078 | -1.132478 | -0.313273 | F | -1.487731 | -1.578896 | 1.897897  |
| C | -0.487577 | 0.778034  | 2.152388  | O | 1.381682  | 0.908028  | 2.200416  |
| F | -0.623012 | -0.520565 | 2.457878  | F | -0.949581 | -0.465735 | 3.697592  |
| S | 1.185922  | 1.082391  | 1.334239  | F | -1.543038 | 0.600856  | 1.889002  |
| O | 1.108035  | 2.485290  | 0.887435  | N | 2.869359  | 2.350310  | -0.230445 |
| N | 1.099287  | 0.145566  | 0.023934  | H | 3.542010  | 3.128875  | -0.169799 |
| S | 1.699945  | -1.350856 | -0.084561 | H | 3.282290  | 1.621767  | -0.812628 |
| O | 1.911924  | -2.082476 | 1.170723  | H | 2.750985  | 1.944536  | 0.699244  |
| O | 2.178015  | 0.725860  | 2.356235  | N | 4.825567  | 4.741899  | -0.098137 |
| F | -0.576393 | 1.502537  | 3.278386  | H | 5.539258  | 4.705858  | -0.825477 |
| F | -1.484867 | 1.134539  | 1.328990  | H | 5.320389  | 4.785457  | 0.792311  |
| C | 3.428876  | -1.035041 | -0.772980 | H | 4.344390  | 5.634218  | -0.207170 |
| F | 4.149580  | -0.299338 | 0.084780  | N | -5.183222 | 2.552609  | 0.070947  |
| O | 1.000563  | -2.024797 | -1.190264 | H | -5.655052 | 1.930578  | -0.585131 |
| F | 4.054042  | -2.204447 | -0.976272 | H | -5.785196 | 3.369323  | 0.175168  |
| F | 3.350139  | -0.378839 | -1.943068 | H | -5.188730 | 2.075228  | 0.972177  |

**Fig. S3o**

|   |           |           |           |
|---|-----------|-----------|-----------|
| N | -0.828242 | 1.711240  | 1.754317  |
| C | 0.333683  | 1.387247  | 2.327964  |
| N | 0.130916  | 0.271825  | 3.039962  |
| C | -1.183090 | -0.139494 | 2.912652  |
| C | -1.792071 | 0.773079  | 2.101730  |
| H | 0.851733  | -0.210689 | 3.561880  |
| C | -1.028829 | 2.849626  | 0.840967  |
| C | -1.602517 | 2.400593  | -0.503253 |
| C | -1.696984 | 3.559808  | -1.500594 |
| C | -2.260620 | 3.104398  | -2.851874 |
| H | -1.545248 | -1.053024 | 3.368574  |



|   |           |           |           |
|---|-----------|-----------|-----------|
| H | -2.808375 | 0.828783  | 1.723960  |
| H | 1.268182  | 1.941289  | 2.233325  |
| H | -0.051189 | 3.317161  | 0.706548  |
| H | -1.692175 | 3.566346  | 1.336062  |
| H | -2.595630 | 1.963257  | -0.349543 |
| H | -0.959974 | 1.614372  | -0.907882 |
| H | -0.698668 | 3.995761  | -1.646666 |
| H | -2.329569 | 4.356950  | -1.084492 |
| H | -2.319148 | 3.938406  | -3.561091 |
| H | -3.269615 | 2.687958  | -2.736669 |
| H | -1.627516 | 2.326139  | -3.296343 |
| N | -1.977394 | -3.291726 | 3.489086  |
| H | -1.577171 | -4.075621 | 4.004107  |
| H | -1.549498 | -3.296515 | 2.562662  |
| H | -2.964859 | -3.508951 | 3.355956  |
| N | 2.973959  | 3.071938  | 1.743435  |
| H | 3.074357  | 4.084274  | 1.809544  |
| H | 2.853360  | 2.844817  | 0.755979  |
| H | 3.866759  | 2.671021  | 2.028797  |
| N | -4.786699 | 0.826466  | 0.703620  |
| H | -5.519045 | 0.398386  | 1.269844  |
| H | -4.588040 | 0.172944  | -0.053401 |
| H | -5.202273 | 1.651342  | 0.271398  |
| C | -1.591871 | -1.544372 | -1.539948 |
| F | -1.247665 | -0.787696 | -2.592851 |
| S | -0.060583 | -2.020751 | -0.542598 |
| O | -0.608369 | -2.629940 | 0.677198  |
| N | 0.553490  | -0.576458 | -0.153685 |
| S | 1.725446  | 0.163152  | -0.982779 |
| O | 1.925309  | -0.243277 | -2.380167 |
| O | 0.729369  | -2.858009 | -1.456478 |
| F | -2.201754 | -2.654884 | -1.984837 |
| F | -2.457289 | -0.855066 | -0.779833 |
| C | 3.284260  | -0.410637 | -0.084210 |
| F | 3.419275  | -1.740972 | -0.173960 |
| O | 1.651845  | 1.599269  | -0.670469 |
| F | 4.360687  | 0.173942  | -0.634883 |
| F | 3.229699  | -0.069950 | 1.214708  |

**[BIm][Tf<sub>2</sub>N]...4NH<sub>3</sub>**

| <b>Fig. S4a</b> |           |          | <b>Fig. S4b</b> |   |           |           |          |
|-----------------|-----------|----------|-----------------|---|-----------|-----------|----------|
| N               | -0.381762 | 2.131449 | 1.689567        | N | 0.991183  | -1.092064 | 2.360828 |
| C               | 0.903903  | 1.792072 | 1.506534        | C | -0.187125 | -1.648973 | 2.046229 |

|   |           |           |           |   |           |           |           |
|---|-----------|-----------|-----------|---|-----------|-----------|-----------|
| N | 1.264662  | 0.931483  | 2.456079  | N | -1.159231 | -0.825535 | 2.440975  |
| C | 0.178766  | 0.692920  | 3.268951  | C | -0.600373 | 0.298923  | 3.011219  |
| C | -0.858413 | 1.446463  | 2.794984  | C | 0.754495  | 0.132742  | 2.966099  |
| H | 2.255628  | 0.441279  | 2.497607  | H | -2.198480 | -0.982112 | 2.261230  |
| C | -1.164482 | 3.025156  | 0.820793  | C | 2.309042  | -1.659870 | 2.035697  |
| C | -2.403388 | 2.330554  | 0.253666  | C | 3.132863  | -0.720710 | 1.152415  |
| C | -3.118871 | 3.198982  | -0.786698 | C | 4.432346  | -1.377738 | 0.674985  |
| C | -4.349343 | 2.495870  | -1.371483 | C | 5.255733  | -0.439812 | -0.215582 |
| H | 0.226836  | 0.009511  | 4.102383  | H | -1.216326 | 1.114657  | 3.364281  |
| H | -1.876282 | 1.549320  | 3.135159  | H | 1.558402  | 0.772116  | 3.293445  |
| H | 1.539960  | 2.160184  | 0.713361  | H | -0.315275 | -2.612719 | 1.557592  |
| H | -0.499658 | 3.331712  | 0.011016  | H | 2.120014  | -2.603773 | 1.519476  |
| H | -1.435983 | 3.913271  | 1.400786  | H | 2.827590  | -1.879363 | 2.974889  |
| H | -3.097779 | 2.083035  | 1.066861  | H | 3.366948  | 0.198693  | 1.704245  |
| H | -2.092888 | 1.386741  | -0.201375 | H | 2.524058  | -0.433924 | 0.290999  |
| H | -2.415756 | 3.442663  | -1.595273 | H | 4.189059  | -2.293515 | 0.118106  |
| H | -3.417412 | 4.153860  | -0.331091 | H | 5.032646  | -1.688105 | 1.542141  |
| H | -4.848557 | 3.123650  | -2.118856 | H | 6.176452  | -0.924880 | -0.560477 |
| H | -5.079224 | 2.261161  | -0.586095 | H | 5.537573  | 0.471489  | 0.327295  |
| H | -4.066235 | 1.553094  | -1.856034 | H | 4.681000  | -0.136883 | -1.099862 |
| C | 1.894662  | -0.672268 | -1.843736 | C | -1.568338 | -1.471363 | -1.910813 |
| F | 1.981448  | -2.012396 | -1.834994 | F | -2.365841 | -0.483115 | -2.347459 |
| S | 0.101547  | -0.122456 | -1.629221 | S | 0.185055  | -0.828710 | -1.631772 |
| O | 0.193073  | 1.346997  | -1.589702 | O | 0.880224  | -1.963865 | -1.005920 |
| N | -0.240007 | -0.624500 | -0.135111 | N | -0.047835 | 0.293216  | -0.495498 |
| S | -0.873169 | -2.067589 | 0.224227  | S | -0.289828 | 1.859923  | -0.798859 |
| O | -0.826256 | -3.095788 | -0.825058 | O | -0.612724 | 2.234815  | -2.182600 |
| O | -0.626571 | -0.747205 | -2.741153 | O | 0.634391  | -0.371403 | -2.953073 |
| F | 2.369160  | -0.215671 | -3.013989 | F | -1.550937 | -2.450603 | -2.828500 |
| F | 2.653420  | -0.186309 | -0.851144 | F | -2.078256 | -1.961565 | -0.769446 |
| C | -2.707428 | -1.659472 | 0.414146  | C | 1.425343  | 2.584494  | -0.488666 |
| F | -3.178116 | -1.103679 | -0.713141 | F | 2.328580  | 1.984810  | -1.279186 |
| O | -0.443840 | -2.427641 | 1.584370  | O | -1.115510 | 2.416537  | 0.285608  |
| F | -3.392605 | -2.787373 | 0.660191  | F | 1.412192  | 3.898530  | -0.762997 |
| F | -2.903868 | -0.806322 | 1.429948  | F | 1.790885  | 2.415207  | 0.789807  |
| N | 3.668517  | -0.257603 | 2.367264  | N | -3.855910 | -1.141296 | 1.844450  |
| H | 4.231055  | -0.320909 | 3.215214  | H | -4.511729 | -1.077542 | 2.622834  |
| H | 4.198319  | 0.287157  | 1.668485  | H | -4.059615 | -2.013992 | 1.357573  |
| H | 3.519023  | -1.212433 | 2.008074  | H | -4.063108 | -0.367353 | 1.193624  |
| N | 4.870901  | 1.559738  | 0.203166  | N | -3.020359 | 2.549448  | 2.884771  |
| H | 5.645497  | 2.196074  | 0.390188  | H | -3.650330 | 1.889953  | 2.427748  |
| H | 4.080044  | 2.133332  | -0.108932 | H | -2.387230 | 2.878233  | 2.155970  |
| H | 5.150761  | 0.989493  | -0.594444 | H | -3.588468 | 3.347324  | 3.167803  |
| N | 2.760424  | -3.010627 | 1.310961  | N | -4.103596 | 1.218611  | -0.095756 |

|                 |           |           |           |                 |           |           |           |
|-----------------|-----------|-----------|-----------|-----------------|-----------|-----------|-----------|
| H               | 2.823973  | -3.070739 | 0.295389  | H               | -4.141181 | 0.798887  | -1.024323 |
| H               | 1.767380  | -2.922562 | 1.531567  | H               | -3.201493 | 1.691674  | -0.030193 |
| H               | 3.066413  | -3.912198 | 1.675308  | H               | -4.819239 | 1.944507  | -0.076509 |
| N               | 2.516261  | 3.331775  | -1.102518 | N               | -0.372070 | -4.432653 | 0.418166  |
| H               | 3.204598  | 3.586868  | -1.811162 | H               | -1.292413 | -4.655456 | 0.040411  |
| H               | 2.039465  | 4.197880  | -0.850363 | H               | 0.100831  | -5.321903 | 0.575981  |
| H               | 1.825179  | 2.740458  | -1.566151 | H               | 0.136828  | -3.947720 | -0.321315 |
| <b>Fig. S4c</b> |           |           |           | <b>Fig. S4d</b> |           |           |           |
| N               | -1.272645 | 2.677234  | 0.875175  | N               | 0.978193  | -2.121122 | 1.257820  |
| C               | 0.040628  | 2.520326  | 0.658567  | C               | -0.353730 | -2.265388 | 1.307765  |
| N               | 0.642727  | 2.233165  | 1.810335  | N               | -0.811969 | -1.574148 | 2.352320  |
| C               | -0.312301 | 2.183677  | 2.802590  | C               | 0.248924  | -0.955883 | 2.980899  |
| C               | -1.517813 | 2.463609  | 2.221982  | C               | 1.382431  | -1.298881 | 2.299470  |
| H               | 1.701153  | 1.970070  | 1.909064  | H               | -1.844593 | -1.454159 | 2.591313  |
| C               | -2.287567 | 2.919046  | -0.163495 | C               | 1.852199  | -2.688932 | 0.219511  |
| C               | -3.237832 | 1.728670  | -0.310388 | C               | 2.656293  | -1.605855 | -0.500397 |
| C               | -4.198209 | 1.903369  | -1.491306 | C               | 3.479927  | -2.176275 | -1.659208 |
| C               | -5.130935 | 0.696996  | -1.652711 | C               | 4.290258  | -1.088321 | -2.373827 |
| H               | -0.061579 | 1.954008  | 3.826441  | H               | 0.110030  | -0.319752 | 3.840836  |
| H               | -2.511015 | 2.530026  | 2.637259  | H               | 2.422497  | -1.022624 | 2.440373  |
| H               | 0.515394  | 2.586113  | -0.306528 | H               | -0.951314 | -2.852395 | 0.614233  |
| H               | -1.745073 | 3.090952  | -1.095261 | H               | 1.201212  | -3.215728 | -0.481911 |
| H               | -2.826986 | 3.834674  | 0.098630  | H               | 2.513338  | -3.421835 | 0.694031  |
| H               | -3.809690 | 1.595519  | 0.617455  | H               | 3.321219  | -1.109492 | 0.215705  |
| H               | -2.637449 | 0.825884  | -0.449942 | H               | 1.960601  | -0.849957 | -0.874806 |
| H               | -3.614058 | 2.041527  | -2.411684 | H               | 2.807052  | -2.665631 | -2.377449 |
| H               | -4.792887 | 2.817892  | -1.355616 | H               | 4.158037  | -2.956292 | -1.283817 |
| H               | -5.805735 | 0.826544  | -2.507014 | H               | 4.872327  | -1.504615 | -3.204474 |
| H               | -5.746179 | 0.552345  | -0.755389 | H               | 4.989894  | -0.601846 | -1.681880 |
| H               | -4.554288 | -0.222707 | -1.813673 | H               | 3.629548  | -0.311835 | -2.779616 |
| C               | 1.844210  | -0.260793 | -1.744868 | C               | -2.737001 | -0.058673 | -1.325445 |
| F               | 2.394729  | -1.408100 | -1.322619 | F               | -3.232864 | 1.158726  | -1.050443 |
| S               | -0.039222 | -0.339303 | -1.638820 | S               | -0.876138 | 0.038628  | -1.632576 |
| O               | -0.461075 | 0.990875  | -2.106094 | O               | -0.472360 | -1.367730 | -1.785958 |
| N               | -0.315742 | -0.388094 | -0.048894 | N               | -0.322286 | 0.555570  | -0.209172 |
| S               | -0.368532 | -1.734697 | 0.839024  | S               | -0.088402 | 2.106294  | 0.176109  |
| O               | 0.291636  | -2.922596 | 0.274324  | O               | -0.717958 | 3.114451  | -0.689110 |
| O               | -0.412773 | -1.523657 | -2.423312 | O               | -0.733634 | 0.940263  | -2.783354 |
| F               | 2.214346  | -0.048405 | -3.017862 | F               | -3.351121 | -0.537900 | -2.418948 |
| F               | 2.307993  | 0.746290  | -0.988004 | F               | -3.003386 | -0.873364 | -0.291868 |
| C               | -2.209922 | -2.154757 | 0.849966  | C               | 1.764684  | 2.311110  | -0.117944 |
| F               | -2.660911 | -2.331744 | -0.400157 | F               | 2.072556  | 2.013178  | -1.389316 |
| O               | -0.084563 | -1.367675 | 2.234443  | O               | -0.230211 | 2.241784  | 1.634203  |

|                 |           |           |           |                 |           |           |           |
|-----------------|-----------|-----------|-----------|-----------------|-----------|-----------|-----------|
| F               | -2.405805 | -3.285880 | 1.546618  | F               | 2.119881  | 3.582630  | 0.126883  |
| F               | -2.911542 | -1.166813 | 1.425636  | F               | 2.464595  | 1.505536  | 0.695167  |
| N               | 3.247401  | 1.493376  | 1.987167  | N               | -3.503072 | -1.107083 | 2.857799  |
| H               | 3.705842  | 1.732712  | 2.866447  | H               | -3.591030 | -0.093502 | 2.676828  |
| H               | 3.808277  | 1.900867  | 1.223695  | H               | -3.862136 | -1.290243 | 3.794446  |
| H               | 3.294385  | 0.472302  | 1.887983  | H               | -4.119670 | -1.590388 | 2.204951  |
| N               | 4.853733  | 2.335520  | -0.507798 | N               | -3.398602 | 1.872004  | 2.194438  |
| H               | 5.717557  | 2.867106  | -0.612790 | H               | -2.395654 | 2.063324  | 2.188069  |
| H               | 4.263095  | 2.577612  | -1.302593 | H               | -3.836455 | 2.595430  | 2.763710  |
| H               | 5.090247  | 1.337400  | -0.597831 | H               | -3.722469 | 2.017370  | 1.238852  |
| N               | 3.074978  | -1.702933 | 1.877468  | N               | 4.539752  | -0.274166 | 2.468378  |
| H               | 2.768335  | -2.316145 | 1.121559  | H               | 4.407348  | 0.602281  | 1.964375  |
| H               | 2.247880  | -1.574206 | 2.462080  | H               | 5.318119  | -0.752761 | 2.015551  |
| H               | 3.743096  | -2.239203 | 2.430999  | H               | 4.860550  | -0.023683 | 3.403565  |
| N               | 5.312750  | -0.736766 | -0.337548 | N               | -2.058913 | -3.902791 | -0.911491 |
| H               | 5.077215  | -1.339751 | -1.124746 | H               | -3.053664 | -3.681053 | -0.884869 |
| H               | 4.622522  | -0.926847 | 0.393165  | H               | -1.981288 | -4.849393 | -1.281916 |
| H               | 6.214948  | -1.055768 | 0.014256  | H               | -1.640136 | -3.274637 | -1.597746 |
| <b>Fig. S4e</b> |           |           |           | <b>Fig. S4f</b> |           |           |           |
| N               | 0.977335  | -2.125013 | 1.252358  | N               | 0.978179  | -2.125040 | 1.251744  |
| C               | -0.354677 | -2.268877 | 1.300864  | C               | -0.353779 | -2.269597 | 1.299742  |
| N               | -0.813446 | -1.580301 | 2.346951  | N               | -0.813317 | -1.580917 | 2.345424  |
| C               | 0.247241  | -0.964285 | 2.978118  | C               | 0.246788  | -0.964116 | 2.976804  |
| C               | 1.381112  | -1.305782 | 2.296554  | C               | 1.381125  | -1.305285 | 2.295857  |
| H               | -1.846137 | -1.460445 | 2.585579  | H               | -1.846132 | -1.461810 | 2.584069  |
| C               | 1.852000  | -2.690662 | 0.213452  | C               | 1.853678  | -2.690429 | 0.213405  |
| C               | 2.655265  | -1.605976 | -0.504949 | C               | 2.655240  | -1.605225 | -0.506125 |
| C               | 3.480823  | -2.174508 | -1.663328 | C               | 3.482094  | -2.173646 | -1.663637 |
| C               | 4.290539  | -1.085069 | -2.376367 | C               | 4.290506  | -1.083679 | -2.377355 |
| H               | 0.107971  | -0.330353 | 3.839626  | H               | 0.106808  | -0.330073 | 3.838117  |
| H               | 2.421211  | -1.030515 | 2.439078  | H               | 2.421054  | -1.029463 | 2.438699  |
| H               | -0.951962 | -2.854101 | 0.605539  | H               | -0.950549 | -2.855235 | 0.604306  |
| H               | 1.201647  | -3.217210 | -0.488771 | H               | 1.204193  | -3.218871 | -0.488212 |
| H               | 2.513670  | -3.423591 | 0.687184  | H               | 2.516511  | -3.421776 | 0.687949  |
| H               | 3.318843  | -1.109203 | 0.212119  | H               | 3.317764  | -1.106497 | 0.210539  |
| H               | 1.958852  | -0.850771 | -0.879463 | H               | 1.957657  | -0.851608 | -0.881643 |
| H               | 2.809348  | -2.664255 | -2.382611 | H               | 2.811626  | -2.665049 | -2.382728 |
| H               | 4.159545  | -2.953905 | -1.287750 | H               | 4.161814  | -2.951695 | -1.287066 |
| H               | 4.874083  | -1.500118 | -3.206603 | H               | 4.874952  | -1.498626 | -3.207006 |
| H               | 4.988768  | -0.598117 | -1.683333 | H               | 4.987776  | -0.595117 | -1.684489 |
| H               | 3.629316  | -0.309175 | -2.782438 | H               | 3.628328  | -0.309087 | -2.784353 |
| C               | -2.738418 | -0.052271 | -1.323123 | C               | -2.739032 | -0.051559 | -1.322275 |
| F               | -3.232227 | 1.165322  | -1.045317 | F               | -3.232593 | 1.166000  | -1.043952 |

|   |           |           |           |   |           |           |           |
|---|-----------|-----------|-----------|---|-----------|-----------|-----------|
| S | -0.877965 | 0.043275  | -1.632762 | S | -0.878789 | 0.044119  | -1.633086 |
| O | -0.475950 | -1.363194 | -1.789849 | O | -0.476686 | -1.362250 | -1.790752 |
| N | -0.321374 | 0.556315  | -0.209037 | N | -0.321378 | 0.556823  | -0.209577 |
| S | -0.084773 | 2.105666  | 0.179834  | S | -0.084728 | 2.105992  | 0.179842  |
| O | -0.712232 | 3.117000  | -0.683146 | O | -0.710814 | 3.117786  | -0.683603 |
| O | -0.736666 | 0.947450  | -2.781713 | O | -0.738337 | 0.948559  | -2.781922 |
| F | -3.354653 | -0.528710 | -2.416672 | F | -3.355960 | -0.527828 | -2.415497 |
| F | -3.004562 | -0.868460 | -0.290677 | F | -3.004541 | -0.867927 | -0.289799 |
| C | 1.768600  | 2.307842  | -0.113991 | C | 1.768971  | 2.307468  | -0.112138 |
| F | 2.075812  | 2.011470  | -1.385881 | F | 2.077183  | 2.011357  | -1.383861 |
| O | -0.226283 | 2.238104  | 1.638234  | O | -0.227745 | 2.238239  | 1.638137  |
| F | 2.125894  | 3.578404  | 0.132822  | F | 2.126494  | 3.577848  | 0.135332  |
| F | 2.467290  | 1.499861  | 0.697767  | F | 2.466657  | 1.499047  | 0.700001  |
| N | -3.504470 | -1.112004 | 2.852151  | N | -3.504554 | -1.115237 | 2.851457  |
| H | -3.865501 | -1.297362 | 3.787609  | H | -3.591651 | -0.100973 | 2.674139  |
| H | -4.120844 | -1.592141 | 2.196775  | H | -3.864680 | -1.301671 | 3.787042  |
| H | -3.590157 | -0.097685 | 2.674241  | H | -4.120604 | -1.595863 | 2.196137  |
| N | 4.539389  | -0.283521 | 2.469371  | N | -3.396034 | 1.867174  | 2.201512  |
| H | 4.859628  | -0.034355 | 3.405104  | H | -2.392444 | 2.054913  | 2.189739  |
| H | 4.407586  | 0.593652  | 1.966476  | H | -3.827106 | 2.587530  | 2.779791  |
| H | 5.317940  | -0.761702 | 2.016425  | H | -3.726118 | 2.021546  | 1.249486  |
| N | -3.393966 | 1.869971  | 2.201232  | N | -2.069472 | -3.895058 | -0.919508 |
| H | -3.719190 | 2.021598  | 1.247097  | H | -3.062622 | -3.666961 | -0.887784 |
| H | -2.391138 | 2.061897  | 2.194938  | H | -1.999681 | -4.841542 | -1.291796 |
| H | -3.831579 | 2.589095  | 2.776105  | H | -1.649955 | -3.268484 | -1.606748 |
| N | -2.071292 | -3.894812 | -0.917926 | N | 4.539534  | -0.284168 | 2.469039  |
| H | -3.064300 | -3.665974 | -0.887058 | H | 4.409104  | 0.594566  | 1.968521  |
| H | -2.001945 | -4.841786 | -1.289048 | H | 5.313032  | -0.765351 | 2.010649  |
| H | -1.650939 | -3.269331 | -1.605651 | H | 4.866450  | -0.038370 | 3.403346  |

**Fig. S4g**

|   |           |           |           |
|---|-----------|-----------|-----------|
| N | -0.861621 | -1.331793 | -2.387942 |
| C | 0.421412  | -1.499272 | -2.036609 |
| N | 1.139648  | -0.487305 | -2.516642 |
| C | 0.297601  | 0.373854  | -3.187474 |
| C | -0.961220 | -0.153960 | -3.111787 |
| H | 2.209374  | -0.349018 | -2.329890 |
| C | -1.975792 | -2.214310 | -2.007914 |
| C | -2.986402 | -1.506803 | -1.103577 |
| C | -4.090225 | -2.457816 | -0.628540 |
| C | -5.088796 | -1.759684 | 0.302205  |
| H | 0.668735  | 1.289423  | -3.624752 |
| H | -1.905244 | 0.198181  | -3.496191 |
| H | 0.792470  | -2.308926 | -1.430072 |

**Fig. S4h**

|   |           |           |           |
|---|-----------|-----------|-----------|
| N | -0.175582 | -1.605763 | 2.047522  |
| C | -1.353188 | -1.158649 | 1.591195  |
| N | -1.631137 | -0.002240 | 2.194104  |
| C | -0.602449 | 0.316822  | 3.053738  |
| C | 0.314941  | -0.691010 | 2.966196  |
| H | -2.491980 | 0.588003  | 1.978261  |
| C | 0.513449  | -2.821279 | 1.584239  |
| C | 1.897355  | -2.511178 | 1.010633  |
| C | 2.539952  | -3.748289 | 0.373920  |
| C | 3.924575  | -3.439480 | -0.207356 |
| H | -0.608228 | 1.237072  | 3.617772  |
| H | 1.263077  | -0.830642 | 3.459764  |
| H | -1.970102 | -1.657100 | 0.856078  |

|                 |           |           |           |                 |           |           |           |
|-----------------|-----------|-----------|-----------|-----------------|-----------|-----------|-----------|
| H               | -1.535167 | -3.070254 | -1.492005 | H               | -0.124059 | -3.266586 | 0.818005  |
| H               | -2.448467 | -2.574173 | -2.927488 | H               | 0.577861  | -3.517675 | 2.426473  |
| H               | -3.433320 | -0.659465 | -1.639035 | H               | 2.550481  | -2.124172 | 1.803261  |
| H               | -2.453227 | -1.096348 | -0.241954 | H               | 1.794201  | -1.720631 | 0.262829  |
| H               | -3.632949 | -3.308560 | -0.103965 | H               | 1.882842  | -4.124644 | -0.422546 |
| H               | -4.620108 | -2.873274 | -1.497421 | H               | 2.621037  | -4.551446 | 1.120221  |
| H               | -5.868598 | -2.452340 | 0.639961  | H               | 4.368686  | -4.328416 | -0.670469 |
| H               | -5.580411 | -0.920091 | -0.205767 | H               | 4.610310  | -3.088026 | 0.574151  |
| H               | -4.582216 | -1.361558 | 1.190200  | H               | 3.860727  | -2.655597 | -0.972563 |
| C               | 1.791710  | -0.998409 | 2.043774  | C               | -1.719400 | 0.484752  | -2.098883 |
| F               | 2.180520  | 0.165200  | 2.589634  | F               | -1.664502 | 1.813425  | -2.268020 |
| S               | -0.039915 | -0.943242 | 1.588645  | S               | -0.003363 | -0.204658 | -1.715988 |
| O               | -0.255557 | -2.209247 | 0.871346  | O               | -0.259780 | -1.616294 | -1.382498 |
| N               | -0.089453 | 0.247213  | 0.497883  | N               | 0.380053  | 0.552352  | -0.343583 |
| S               | -0.314157 | 1.806018  | 0.854330  | S               | 1.213372  | 1.936008  | -0.266437 |
| O               | -0.196863 | 2.196730  | 2.265966  | O               | 1.267423  | 2.750297  | -1.488962 |
| O               | -0.743761 | -0.722026 | 2.858719  | O               | 0.799760  | 0.098328  | -2.907793 |
| F               | 2.009083  | -1.984558 | 2.928045  | F               | -2.189126 | -0.078416 | -3.223936 |
| F               | 2.535820  | -1.227236 | 0.950574  | F               | -2.570003 | 0.212578  | -1.096641 |
| C               | -2.137938 | 2.048349  | 0.435606  | C               | 2.980268  | 1.317980  | -0.015318 |
| F               | -2.893757 | 1.206913  | 1.156934  | F               | 3.333536  | 0.492338  | -1.012387 |
| O               | 0.390147  | 2.614451  | -0.155943 | O               | 0.891374  | 2.593897  | 1.008092  |
| F               | -2.497875 | 3.309377  | 0.722871  | F               | 3.823395  | 2.362650  | 0.002138  |
| F               | -2.360598 | 1.823338  | -0.866828 | F               | 3.087791  | 0.658026  | 1.147460  |
| N               | 3.769356  | -0.190444 | -1.929319 | N               | -3.936819 | 1.358478  | 1.454877  |
| H               | 4.394446  | 0.042666  | -2.700714 | H               | -4.552745 | 1.769097  | 2.156500  |
| H               | 4.102896  | -1.070332 | -1.508777 | H               | -4.432609 | 0.549952  | 1.038834  |
| H               | 3.844138  | 0.557396  | -1.224154 | H               | -3.819575 | 2.051918  | 0.716391  |
| N               | 4.471810  | -2.906572 | -0.599699 | N               | -5.105083 | -1.164865 | 0.242588  |
| H               | 5.176697  | -3.546181 | -0.965232 | H               | -5.781589 | -1.683540 | 0.802467  |
| H               | 3.594452  | -3.424931 | -0.568793 | H               | -4.338658 | -1.811142 | 0.024123  |
| H               | 4.725122  | -2.713712 | 0.368721  | H               | -5.567270 | -0.951152 | -0.641184 |
| N               | 3.570664  | 2.081375  | 0.152878  | N               | -1.478356 | 3.458758  | 2.917216  |
| H               | 3.711694  | 1.670361  | 1.075243  | H               | -2.350824 | 3.098589  | 2.531409  |
| H               | 2.581399  | 2.325940  | 0.093808  | H               | -0.758305 | 3.287321  | 2.214044  |
| H               | 4.090830  | 2.958185  | 0.143378  | H               | -1.588144 | 4.469844  | 2.989384  |
| N               | 2.150635  | 3.082754  | -2.843460 | N               | -2.828891 | -3.209634 | -0.713448 |
| H               | 1.438962  | 3.122781  | -2.113566 | H               | -3.482570 | -3.496542 | -1.442556 |
| H               | 2.464393  | 4.040206  | -3.000322 | H               | -2.539557 | -4.067729 | -0.243554 |
| H               | 2.939423  | 2.584755  | -2.430587 | H               | -2.005498 | -2.841195 | -1.191672 |
| <b>Fig. S4i</b> |           |           |           | <b>Fig. S4j</b> |           |           |           |
| N               | 0.243591  | 2.422711  | -1.169990 | N               | 0.181427  | -2.558279 | -0.915278 |
| C               | -0.904849 | 2.249990  | -0.497982 | C               | -0.799176 | -1.842982 | -1.483100 |

|   |           |           |           |   |           |           |           |
|---|-----------|-----------|-----------|---|-----------|-----------|-----------|
| N | -1.754496 | 1.575531  | -1.272655 | N | -1.803570 | -1.724597 | -0.617698 |
| C | -1.135249 | 1.289960  | -2.469486 | C | -1.462308 | -2.365951 | 0.554217  |
| C | 0.120623  | 1.824202  | -2.413350 | C | -0.215004 | -2.894065 | 0.369933  |
| H | -2.738713 | 1.231550  | -0.958015 | H | -2.712864 | -1.161516 | -0.780943 |
| C | 1.448790  | 3.075288  | -0.635273 | C | 1.479339  | -2.871341 | -1.533776 |
| C | 2.656520  | 2.136291  | -0.632153 | C | 2.647593  | -2.261950 | -0.757429 |
| C | 3.874143  | 2.775758  | 0.044003  | C | 3.985678  | -2.485969 | -1.470306 |
| C | 5.085057  | 1.835415  | 0.053505  | C | 5.157245  | -1.864547 | -0.700792 |
| H | -1.624383 | 0.724215  | -3.246527 | H | -2.141370 | -2.365780 | 1.397181  |
| H | 0.926298  | 1.821521  | -3.129702 | H | 0.421003  | -3.463986 | 1.028136  |
| H | -1.099087 | 2.610202  | 0.509968  | H | -0.756427 | -1.412076 | -2.469758 |
| H | 1.204847  | 3.389649  | 0.382057  | H | 1.445374  | -2.472764 | -2.550270 |
| H | 1.645222  | 3.971409  | -1.233482 | H | 1.568378  | -3.960772 | -1.596514 |
| H | 2.912878  | 1.858150  | -1.662493 | H | 2.688999  | -2.695724 | 0.249428  |
| H | 2.380440  | 1.217153  | -0.108805 | H | 2.463130  | -1.191108 | -0.637806 |
| H | 3.612296  | 3.047506  | 1.076302  | H | 3.935667  | -2.050003 | -2.477983 |
| H | 4.134839  | 3.711758  | -0.470315 | H | 4.158704  | -3.563437 | -1.603118 |
| H | 5.946359  | 2.300289  | 0.547562  | H | 6.107452  | -2.029462 | -1.222200 |
| H | 5.385120  | 1.569853  | -0.968275 | H | 5.243320  | -2.299203 | 0.303306  |
| H | 4.852089  | 0.904335  | 0.585322  | H | 5.018383  | -0.782490 | -0.584477 |
| C | -1.132102 | -0.714345 | 2.464587  | C | -0.654031 | 2.273390  | -1.764867 |
| F | -1.565724 | -1.957884 | 2.203121  | F | -1.059020 | 3.097769  | -0.784399 |
| S | 0.582173  | -0.442334 | 1.720971  | S | 0.930424  | 1.375174  | -1.264949 |
| O | 0.855067  | 0.979353  | 1.984854  | O | 1.117472  | 0.382210  | -2.333773 |
| N | 0.296726  | -0.600629 | 0.141761  | N | 0.464701  | 0.584746  | 0.063040  |
| S | 0.434256  | -1.984904 | -0.678674 | S | 0.581002  | 1.167228  | 1.565099  |
| O | 0.486417  | -3.225340 | 0.108880  | O | 0.869057  | 2.601675  | 1.707749  |
| O | 1.436092  | -1.451173 | 2.362433  | O | 1.934026  | 2.435867  | -1.104137 |
| F | -1.079794 | -0.546242 | 3.795622  | F | -0.437125 | 2.995974  | -2.874616 |
| F | -2.011107 | 0.163409  | 1.955231  | F | -1.635289 | 1.389925  | -2.011095 |
| C | 2.156188  | -1.822538 | -1.438223 | C | 2.130701  | 0.300612  | 2.205046  |
| F | 3.068375  | -1.598960 | -0.479666 | F | 3.175907  | 0.564843  | 1.405792  |
| O | -0.472519 | -1.925279 | -1.835375 | O | -0.504145 | 0.584589  | 2.370848  |
| F | 2.471301  | -2.959584 | -2.079401 | F | 2.409211  | 0.742295  | 3.442086  |
| F | 2.196459  | -0.809237 | -2.315750 | F | 1.948139  | -1.027009 | 2.253590  |
| N | -4.163114 | 0.605962  | -0.447887 | N | -4.093569 | -0.251136 | -0.888941 |
| H | -4.967084 | 0.824685  | -1.053581 | H | -4.936645 | -0.795649 | -0.672113 |
| H | -4.398912 | 0.902205  | 0.499248  | H | -4.242904 | 0.219792  | -1.780430 |
| H | -4.040611 | -0.417716 | -0.429605 | H | -3.983533 | 0.471685  | -0.165362 |
| N | -6.506478 | 1.252228  | -2.401076 | N | -6.597113 | -2.073066 | -0.159164 |
| H | -6.536708 | 0.533833  | -3.124106 | H | -7.280676 | -1.680855 | 0.488328  |
| H | -6.389772 | 2.143572  | -2.882158 | H | -6.512962 | -3.062563 | 0.074117  |
| H | -7.431332 | 1.271631  | -1.972367 | H | -7.027429 | -2.036104 | -1.083694 |
| N | -3.412940 | -2.389935 | -0.536676 | N | -3.296204 | 1.728354  | 1.390636  |

|                 |           |           |           |                 |           |           |           |
|-----------------|-----------|-----------|-----------|-----------------|-----------|-----------|-----------|
| H               | -3.116309 | -2.706785 | 0.385644  | H               | -3.027513 | 2.510580  | 0.793284  |
| H               | -2.566561 | -2.329442 | -1.104285 | H               | -2.428562 | 1.375406  | 1.798484  |
| H               | -3.983654 | -3.136621 | -0.931575 | H               | -3.840880 | 2.127323  | 2.154882  |
| N               | -1.261756 | 3.193245  | 2.575764  | N               | -4.198072 | -1.485106 | 2.187009  |
| H               | -2.081119 | 2.792219  | 3.030838  | H               | -3.944432 | -0.510841 | 2.015669  |
| H               | -1.068899 | 4.075857  | 3.048157  | H               | -4.663337 | -1.510767 | 3.093920  |
| H               | -0.481615 | 2.566877  | 2.776216  | H               | -4.904793 | -1.716606 | 1.487012  |
| <b>Fig. S4k</b> |           |           |           | <b>Fig. S4l</b> |           |           |           |
| N               | -1.247849 | 1.034375  | -2.197863 | N               | 0.241234  | 2.359665  | -0.701134 |
| C               | 0.039067  | 0.859742  | -2.524952 | C               | -1.036660 | 2.005974  | -0.896897 |
| N               | 0.747135  | 1.874969  | -2.033525 | N               | -1.159559 | 1.522117  | -2.132633 |
| C               | -0.103044 | 2.723640  | -1.354148 | C               | 0.074638  | 1.550405  | -2.745564 |
| C               | -1.362378 | 2.201723  | -1.456746 | C               | 0.962761  | 2.079695  | -1.851699 |
| H               | 1.811279  | 1.957598  | -2.080177 | H               | -2.072347 | 1.120729  | -2.524285 |
| C               | -2.344785 | 0.105653  | -2.512616 | C               | 0.795427  | 2.897723  | 0.550974  |
| C               | -3.010311 | -0.437579 | -1.247637 | C               | 1.962927  | 2.056408  | 1.068569  |
| C               | -4.110248 | -1.454454 | -1.569654 | C               | 2.446887  | 2.537357  | 2.440214  |
| C               | -4.775289 | -1.998402 | -0.299614 | C               | 3.618110  | 1.695397  | 2.960137  |
| H               | 0.273733  | 3.596355  | -0.840120 | H               | 0.222072  | 1.181922  | -3.748343 |
| H               | -2.316925 | 2.527459  | -1.056253 | H               | 2.031178  | 2.258580  | -1.916086 |
| H               | 0.431132  | 0.014317  | -3.065550 | H               | -1.832981 | 2.098077  | -0.171109 |
| H               | -1.911659 | -0.707251 | -3.099828 | H               | -0.020509 | 2.904154  | 1.276442  |
| H               | -3.066261 | 0.638454  | -3.140580 | H               | 1.103913  | 3.932662  | 0.369356  |
| H               | -3.432851 | 0.394793  | -0.673823 | H               | 2.789196  | 2.095570  | 0.349277  |
| H               | -2.242566 | -0.904405 | -0.624400 | H               | 1.637791  | 1.014722  | 1.133626  |
| H               | -3.680750 | -2.286104 | -2.145636 | H               | 1.613962  | 2.490094  | 3.155672  |
| H               | -4.869141 | -0.986788 | -2.213367 | H               | 2.747956  | 3.593035  | 2.378562  |
| H               | -5.559605 | -2.725656 | -0.540292 | H               | 3.950881  | 2.039621  | 3.946474  |
| H               | -5.233434 | -1.187577 | 0.281444  | H               | 4.475397  | 1.750576  | 2.276821  |
| H               | -4.039400 | -2.495088 | 0.344954  | H               | 3.330472  | 0.640192  | 3.049284  |
| C               | 2.461140  | -1.976818 | -0.638869 | C               | -2.459484 | -1.436456 | 0.866855  |
| F               | 3.177106  | -1.744114 | 0.473100  | F               | -2.488103 | -2.622097 | 0.241821  |
| S               | 0.613438  | -1.950438 | -0.253734 | S               | -0.688090 | -0.974542 | 1.327837  |
| O               | -0.016220 | -2.039183 | -1.579685 | O               | -0.816457 | 0.379520  | 1.894122  |
| N               | 0.403067  | -0.443816 | 0.290001  | N               | 0.021596  | -0.831887 | -0.112101 |
| S               | 0.487820  | -0.008529 | 1.841129  | S               | 0.801045  | -2.029376 | -0.870096 |
| O               | 1.091025  | -0.966569 | 2.777912  | O               | 0.531905  | -3.397327 | -0.402235 |
| O               | 0.408843  | -3.046982 | 0.701925  | O               | -0.231879 | -2.059014 | 2.207589  |
| F               | 2.804626  | -3.176999 | -1.130542 | F               | -3.208900 | -1.513512 | 1.979563  |
| F               | 2.764245  | -1.035702 | -1.548098 | F               | -2.991095 | -0.509093 | 0.055586  |
| C               | -1.332081 | 0.065108  | 2.334462  | C               | 2.592611  | -1.699859 | -0.370277 |
| F               | -1.914938 | -1.126071 | 2.132133  | F               | 2.713397  | -1.689671 | 0.966270  |
| O               | 0.925451  | 1.396319  | 1.900241  | O               | 0.776140  | -1.754787 | -2.312341 |



|                 |           |           |           |                 |           |           |           |
|-----------------|-----------|-----------|-----------|-----------------|-----------|-----------|-----------|
| F               | -1.430920 | 0.381295  | 3.635288  | F               | 3.384683  | -2.662650 | -0.869244 |
| F               | -1.982349 | 0.992386  | 1.615798  | F               | 3.006233  | -0.514528 | -0.846705 |
| N               | 3.518705  | 2.024321  | -2.030648 | N               | -3.599615 | 0.501412  | -2.914645 |
| H               | 3.918838  | 2.922837  | -2.300593 | H               | -3.993179 | 0.773792  | -3.814900 |
| H               | 3.961597  | 1.317524  | -2.617438 | H               | -4.215655 | 0.870806  | -2.170520 |
| H               | 3.798565  | 1.836325  | -1.054610 | H               | -3.633782 | -0.516692 | -2.869531 |
| N               | 2.009150  | 4.213892  | 0.726064  | N               | -5.101659 | 1.677199  | -0.539400 |
| H               | 2.834994  | 3.756451  | 0.339869  | H               | -5.744254 | 2.457154  | -0.676511 |
| H               | 1.523307  | 3.496627  | 1.264638  | H               | -4.392941 | 1.987670  | 0.134301  |
| H               | 2.347405  | 4.906185  | 1.393829  | H               | -5.636965 | 0.940593  | -0.079972 |
| N               | 4.030564  | 1.429558  | 0.930415  | N               | 4.274310  | 2.313594  | -1.877736 |
| H               | 4.349040  | 0.462594  | 0.987159  | H               | 4.675643  | 2.422861  | -2.808996 |
| H               | 3.106163  | 1.454390  | 1.362210  | H               | 4.433679  | 1.343431  | -1.607289 |
| H               | 4.650379  | 1.975182  | 1.528348  | H               | 4.840893  | 2.884864  | -1.251194 |
| N               | -4.247928 | 2.842428  | 0.056614  | N               | -3.071253 | 2.503067  | 1.808812  |
| H               | -3.987298 | 2.412579  | 0.943936  | H               | -3.875648 | 2.437310  | 2.433144  |
| H               | -5.132266 | 2.417417  | -0.221351 | H               | -2.622201 | 3.393684  | 2.023509  |
| H               | -4.449471 | 3.821641  | 0.258287  | H               | -2.422117 | 1.768085  | 2.093713  |
| <b>Fig. S4m</b> |           |           |           | <b>Fig. S4n</b> |           |           |           |
| N               | 0.906780  | 2.516653  | -0.131542 | N               | -0.047899 | 1.418647  | -2.163370 |
| C               | -0.433862 | 2.511200  | -0.132637 | C               | -1.194040 | 1.203819  | -1.499382 |
| N               | -0.867003 | 2.390376  | -1.385243 | N               | -1.752927 | 0.083147  | -1.951442 |
| C               | 0.227930  | 2.297228  | -2.218077 | C               | -0.939002 | -0.453640 | -2.923534 |
| C               | 1.348684  | 2.378717  | -1.438458 | C               | 0.132658  | 0.382470  | -3.064885 |
| H               | -1.919627 | 2.295009  | -1.665737 | H               | -2.660611 | -0.363712 | -1.515026 |
| C               | 1.760925  | 2.602520  | 1.063477  | C               | 0.893163  | 2.520986  | -1.911462 |
| C               | 2.681890  | 1.389558  | 1.199401  | C               | 2.278092  | 2.011677  | -1.507230 |
| C               | 3.508893  | 1.442992  | 2.488141  | C               | 3.203184  | 3.156554  | -1.080236 |
| C               | 4.436932  | 0.229802  | 2.622941  | C               | 4.586626  | 2.648358  | -0.658005 |
| H               | 0.122340  | 2.172231  | -3.284521 | H               | -1.176886 | -1.380101 | -3.422063 |
| H               | 2.405302  | 2.327243  | -1.680775 | H               | 0.995742  | 0.329195  | -3.708895 |
| H               | -1.052602 | 2.562059  | 0.748360  | H               | -1.593239 | 1.840905  | -0.722144 |
| H               | 1.091102  | 2.671948  | 1.922979  | H               | 0.461191  | 3.120901  | -1.107822 |
| H               | 2.338759  | 3.530414  | 0.998360  | H               | 0.944033  | 3.139493  | -2.813482 |
| H               | 3.350106  | 1.339509  | 0.332216  | H               | 2.731654  | 1.463030  | -2.342602 |
| H               | 2.069377  | 0.484124  | 1.188403  | H               | 2.160541  | 1.303621  | -0.682783 |
| H               | 2.832125  | 1.486539  | 3.353002  | H               | 2.740261  | 3.699291  | -0.244307 |
| H               | 4.103074  | 2.367891  | 2.508167  | H               | 3.307456  | 3.877407  | -1.903695 |
| H               | 5.019084  | 0.273800  | 3.550950  | H               | 5.235975  | 3.474550  | -0.345399 |
| H               | 5.142679  | 0.180723  | 1.783718  | H               | 5.082465  | 2.123742  | -1.484726 |
| H               | 3.860847  | -0.703966 | 2.628861  | H               | 4.504737  | 1.946322  | 0.181441  |
| C               | -2.552555 | -0.841171 | 1.375634  | C               | -1.144524 | 0.000650  | 2.531082  |
| F               | -2.923719 | -1.904670 | 0.644463  | F               | -1.267115 | -1.294929 | 2.853652  |

|   |           |           |           |   |           |           |           |
|---|-----------|-----------|-----------|---|-----------|-----------|-----------|
| S | -0.673777 | -0.763409 | 1.536334  | S | 0.523632  | 0.323450  | 1.707222  |
| O | -0.442395 | 0.516860  | 2.223064  | O | 0.429354  | 1.727431  | 1.269923  |
| N | -0.201923 | -0.584092 | 0.003331  | N | 0.449348  | -0.597337 | 0.387774  |
| S | 0.115284  | -1.800158 | -1.011041 | S | 0.956383  | -2.131088 | 0.304261  |
| O | -0.352210 | -3.137810 | -0.619142 | O | 1.191694  | -2.823281 | 1.580253  |
| O | -0.295645 | -2.009028 | 2.217539  | O | 1.522227  | -0.025566 | 2.726601  |
| F | -3.109326 | -0.939144 | 2.593208  | F | -1.244564 | 0.738471  | 3.649624  |
| F | -3.013519 | 0.269376  | 0.778915  | F | -2.147264 | 0.335700  | 1.704940  |
| C | 1.998022  | -1.908359 | -0.925124 | C | 2.676659  | -1.927580 | -0.447827 |
| F | 2.394959  | -2.113619 | 0.339774  | F | 3.433369  | -1.131313 | 0.323797  |
| O | -0.151102 | -1.334839 | -2.381617 | O | 0.185918  | -2.814498 | -0.742586 |
| F | 2.423431  | -2.930884 | -1.684192 | F | 3.269398  | -3.129513 | -0.540743 |
| F | 2.560503  | -0.776370 | -1.375511 | F | 2.601373  | -1.391060 | -1.674950 |
| N | -3.491910 | 2.045147  | -1.979480 | N | -3.952515 | -0.893063 | -0.743063 |
| H | -3.883937 | 2.588970  | -2.747920 | H | -4.698146 | -1.277497 | -1.341067 |
| H | -4.050523 | 2.242657  | -1.136544 | H | -4.316039 | -0.067627 | -0.241166 |
| H | -3.595200 | 1.046210  | -2.213500 | H | -3.714886 | -1.598230 | -0.045575 |
| N | -4.903296 | 2.592339  | 0.737238  | N | -6.122273 | -2.041251 | -2.655310 |
| H | -5.557442 | 3.357617  | 0.898487  | H | -5.979117 | -3.036523 | -2.824469 |
| H | -4.136340 | 2.718356  | 1.396929  | H | -6.085603 | -1.583718 | -3.565765 |
| H | -5.381523 | 1.735457  | 1.013595  | H | -7.078361 | -1.938606 | -2.316335 |
| N | -3.379823 | -0.983167 | -2.573813 | N | -4.651958 | 1.747572  | 0.672499  |
| H | -3.648919 | -1.508471 | -1.742702 | H | -4.812344 | 1.571704  | 1.664128  |
| H | -2.369926 | -1.098634 | -2.670564 | H | -5.423103 | 2.334559  | 0.355090  |
| H | -3.810289 | -1.454801 | -3.368430 | H | -3.798739 | 2.312855  | 0.609261  |
| N | 4.565720  | 1.778247  | -2.005746 | N | -2.005370 | 3.594625  | 0.808292  |
| H | 4.450321  | 0.764985  | -1.999984 | H | -2.478682 | 4.065411  | 1.579970  |
| H | 5.311989  | 1.987358  | -1.342871 | H | -1.647988 | 4.335850  | 0.205076  |
| H | 4.923994  | 2.022748  | -2.928820 | H | -1.192612 | 3.124338  | 1.209418  |

**Fig. S4o**

|   |           |           |          |
|---|-----------|-----------|----------|
| N | -0.304866 | 0.071401  | 2.702182 |
| C | 0.692633  | 0.806826  | 2.192100 |
| N | 1.733055  | 0.003722  | 1.964924 |
| C | 1.397333  | -1.286847 | 2.317594 |
| C | 0.115835  | -1.247657 | 2.787501 |
| H | 2.619359  | 0.303795  | 1.457770 |
| C | -1.656696 | 0.568710  | 3.000131 |
| C | -2.711417 | -0.111870 | 2.124600 |
| C | -4.100633 | 0.506921  | 2.311526 |
| C | -5.152033 | -0.168164 | 1.422838 |
| H | 2.088545  | -2.105444 | 2.175165 |
| H | -0.528801 | -2.028536 | 3.158090 |
| H | 0.651556  | 1.878825  | 2.013593 |

**Fig. S4p**

|   |           |          |           |
|---|-----------|----------|-----------|
| N | -0.127374 | 2.700408 | 0.852746  |
| C | 0.999768  | 1.994837 | 0.673477  |
| N | 1.417885  | 1.525607 | 1.846046  |
| C | 0.524261  | 1.925745 | 2.816196  |
| C | -0.448417 | 2.663810 | 2.199688  |
| H | 2.313606  | 0.860616 | 1.975732  |
| C | -0.924004 | 3.331614 | -0.212102 |
| C | -2.299049 | 2.677934 | -0.355687 |
| C | -3.082709 | 3.248370 | -1.542632 |
| C | -4.456650 | 2.585428 | -1.696269 |
| H | 0.648904  | 1.656994 | 3.853889  |
| H | -1.323381 | 3.159461 | 2.589893  |
| H | 1.463899  | 1.815095 | -0.282616 |

|                 |           |           |           |                 |           |           |           |
|-----------------|-----------|-----------|-----------|-----------------|-----------|-----------|-----------|
| H               | -1.639822 | 1.645048  | 2.814680  | H               | -0.352110 | 3.223701  | -1.135660 |
| H               | -1.854917 | 0.405663  | 4.064446  | H               | -1.010201 | 4.397985  | 0.019686  |
| H               | -2.749995 | -1.183624 | 2.358123  | H               | -2.873290 | 2.817340  | 0.569620  |
| H               | -2.401752 | -0.021268 | 1.079917  | H               | -2.156466 | 1.601748  | -0.484788 |
| H               | -4.052398 | 1.578882  | 2.074015  | H               | -2.499172 | 3.102432  | -2.462293 |
| H               | -4.402077 | 0.432108  | 3.366088  | H               | -3.205881 | 4.333666  | -1.417848 |
| H               | -6.139491 | 0.289180  | 1.556180  | H               | -5.002973 | 2.997275  | -2.552921 |
| H               | -5.240262 | -1.236256 | 1.659629  | H               | -5.070088 | 2.739135  | -0.799220 |
| H               | -4.879980 | -0.082825 | 0.363213  | H               | -4.353611 | 1.503966  | -1.848598 |
| C               | 0.646944  | 2.269148  | -1.803521 | C               | 1.391156  | -1.421457 | -1.718834 |
| F               | 1.279691  | 1.596323  | -2.775390 | F               | 1.330842  | -2.654830 | -1.191836 |
| S               | -0.865797 | 1.308537  | -1.209014 | S               | -0.298808 | -0.584366 | -1.644788 |
| O               | -1.337251 | 2.079139  | -0.047107 | O               | -0.015754 | 0.796250  | -2.067948 |
| N               | -0.206783 | -0.055164 | -0.654235 | N               | -0.594287 | -0.550634 | -0.058344 |
| S               | -0.005048 | -1.397030 | -1.531186 | S               | -1.343205 | -1.720273 | 0.766690  |
| O               | -0.073768 | -1.256677 | -2.993023 | O               | -1.485219 | -3.022403 | 0.099950  |
| O               | -1.737365 | 1.209928  | -2.387531 | O               | -1.176073 | -1.416653 | -2.478414 |
| F               | 0.266829  | 3.465931  | -2.279287 | F               | 1.798148  | -1.516027 | -2.994200 |
| F               | 1.505471  | 2.464585  | -0.788127 | F               | 2.293460  | -0.704997 | -1.029749 |
| C               | -1.541453 | -2.395134 | -1.073633 | C               | -3.102695 | -1.049946 | 0.895658  |
| F               | -2.650809 | -1.695822 | -1.359398 | F               | -3.605998 | -0.828660 | -0.328278 |
| O               | 1.105156  | -2.163462 | -0.948062 | O               | -0.850921 | -1.686232 | 2.153272  |
| F               | -1.559169 | -3.541085 | -1.773951 | F               | -3.877492 | -1.946016 | 1.527347  |
| F               | -1.544674 | -2.690851 | 0.234226  | F               | -3.123357 | 0.099679  | 1.585763  |
| N               | 3.951269  | 0.794062  | 0.474679  | N               | 3.527091  | -0.093669 | 2.045665  |
| H               | 4.820472  | 0.273665  | 0.657467  | H               | 4.122144  | 0.045411  | 2.862396  |
| H               | 4.159858  | 1.787109  | 0.577025  | H               | 4.111523  | 0.036808  | 1.202416  |
| H               | 3.709170  | 0.648418  | -0.505416 | H               | 3.185929  | -1.067658 | 2.064318  |
| N               | 6.532870  | -0.837149 | 1.118815  | N               | 5.076102  | 0.411755  | -0.549796 |
| H               | 6.952751  | -1.433001 | 0.405458  | H               | 5.995668  | 0.871807  | -0.518427 |
| H               | 6.532338  | -1.376886 | 1.984255  | H               | 4.472014  | 0.977760  | -1.145223 |
| H               | 7.184335  | -0.065499 | 1.264524  | H               | 5.197677  | -0.477715 | -1.033585 |
| N               | 0.357019  | 3.994074  | 1.717936  | N               | 2.168813  | -2.852579 | 2.055450  |
| H               | 1.096236  | 4.444888  | 1.179944  | H               | 2.156346  | -3.258994 | 1.120676  |
| H               | -0.018136 | 4.701758  | 2.348551  | H               | 1.209909  | -2.565526 | 2.256819  |
| H               | -0.381975 | 3.757093  | 1.055656  | H               | 2.395569  | -3.609385 | 2.699635  |
| N               | 3.808962  | -2.823004 | 0.651952  | N               | 7.880500  | 1.808313  | -0.310504 |
| H               | 3.064724  | -2.556198 | 0.006772  | H               | 8.358639  | 1.968338  | -1.196637 |
| H               | 4.290409  | -3.617641 | 0.231721  | H               | 8.505307  | 1.237108  | 0.257827  |
| H               | 4.479382  | -2.053696 | 0.670861  | H               | 7.814511  | 2.714412  | 0.152369  |
| <b>Fig. S4q</b> |           |           |           | <b>Fig. S4r</b> |           |           |           |
| N               | -0.655095 | -1.999275 | 2.194123  | N               | -0.579285 | 2.128105  | -1.418723 |
| C               | 0.311406  | -1.078328 | 2.063738  | C               | 0.663327  | 1.715526  | -1.706678 |

|   |           |           |           |   |           |           |           |
|---|-----------|-----------|-----------|---|-----------|-----------|-----------|
| N | 1.404339  | -1.657562 | 1.574686  | N | 1.494819  | 2.149559  | -0.762607 |
| C | 1.136527  | -2.994690 | 1.362597  | C | 0.763501  | 2.848054  | 0.174527  |
| C | -0.155399 | -3.215924 | 1.752900  | C | -0.542335 | 2.843055  | -0.231645 |
| H | 2.293407  | -1.084788 | 1.249381  | H | 2.557501  | 1.898910  | -0.699218 |
| C | -2.050856 | -1.705626 | 2.554897  | C | -1.786073 | 1.820036  | -2.201308 |
| C | -2.942411 | -1.641622 | 1.312055  | C | -2.825665 | 1.059270  | -1.377528 |
| C | -4.384499 | -1.250713 | 1.651442  | C | -4.037807 | 0.655618  | -2.223755 |
| C | -5.261772 | -1.152505 | 0.397824  | C | -5.084453 | -0.103829 | -1.400051 |
| H | 1.871551  | -3.647091 | 0.915828  | H | 1.224744  | 3.276750  | 1.050532  |
| H | -0.757605 | -4.111294 | 1.755076  | H | -1.442747 | 3.253009  | 0.214459  |
| H | 0.185328  | -0.030359 | 2.280094  | H | 0.928732  | 1.101448  | -2.551487 |
| H | -2.047399 | -0.743092 | 3.071300  | H | -1.461384 | 1.221855  | -3.055399 |
| H | -2.387082 | -2.475364 | 3.255309  | H | -2.194737 | 2.764215  | -2.576313 |
| H | -2.927308 | -2.612536 | 0.799704  | H | -3.151721 | 1.681884  | -0.536654 |
| H | -2.515311 | -0.907951 | 0.620794  | H | -2.353058 | 0.167894  | -0.956173 |
| H | -4.383011 | -0.284400 | 2.174806  | H | -3.702817 | 0.028256  | -3.061677 |
| H | -4.812107 | -1.985152 | 2.348659  | H | -4.494764 | 1.552232  | -2.666766 |
| H | -6.288797 | -0.865974 | 0.652811  | H | -5.945500 | -0.390140 | -2.015455 |
| H | -5.301187 | -2.113064 | -0.131709 | H | -5.453088 | 0.512213  | -0.569699 |
| H | -4.864606 | -0.403285 | -0.298449 | H | -4.656154 | -1.018657 | -0.971558 |
| C | 0.040547  | 3.320764  | 0.254474  | C | 1.765066  | -2.293037 | -1.237170 |
| F | 0.609420  | 3.606103  | -0.926177 | F | 2.267575  | -2.811891 | -0.104968 |
| S | -1.088465 | 1.816047  | 0.100689  | S | -0.042737 | -1.804170 | -0.997575 |
| O | -1.464359 | 1.517587  | 1.492535  | O | -0.386566 | -1.128643 | -2.258197 |
| N | -0.059158 | 0.666871  | -0.377338 | N | 0.052935  | -0.672923 | 0.150174  |
| S | 0.237782  | 0.264589  | -1.911391 | S | -0.017874 | -0.965810 | 1.736388  |
| O | -0.110656 | 1.251168  | -2.942787 | O | 0.145571  | -2.362349 | 2.165830  |
| O | -2.136997 | 2.217767  | -0.845841 | O | -0.731650 | -3.055944 | -0.655442 |
| F | -0.672394 | 4.381986  | 0.661502  | F | 1.860852  | -3.210908 | -2.211638 |
| F | 1.009133  | 3.080459  | 1.152344  | F | 2.498426  | -1.221758 | -1.580233 |
| C | -0.953442 | -1.171817 | -2.192376 | C | -1.814752 | -0.548478 | 2.140290  |
| F | -2.222259 | -0.762030 | -2.043762 | F | -2.645996 | -1.284333 | 1.387117  |
| O | 1.565484  | -0.370680 | -1.958480 | O | 0.750803  | 0.078261  | 2.432839  |
| F | -0.794471 | -1.649510 | -3.436798 | F | -2.054521 | -0.813078 | 3.434789  |
| F | -0.713794 | -2.159106 | -1.316694 | F | -2.064325 | 0.750499  | 1.915115  |
| N | 3.406770  | -0.132415 | 0.640659  | N | 4.108239  | 1.448427  | -0.530252 |
| H | 4.315143  | -0.584514 | 0.481129  | H | 4.734018  | 2.228195  | -0.280959 |
| H | 3.552501  | 0.727003  | 1.190831  | H | 4.486185  | 1.004557  | -1.367314 |
| H | 3.029041  | 0.133988  | -0.269566 | H | 4.141634  | 0.752533  | 0.230495  |
| N | 6.149148  | -1.622816 | 0.130098  | N | 5.886379  | 3.866318  | 0.303448  |
| H | 6.518351  | -1.608530 | -0.820620 | H | 5.721286  | 4.069692  | 1.288922  |
| H | 6.344601  | -2.552227 | 0.502217  | H | 5.675693  | 4.722230  | -0.208987 |
| H | 6.724587  | -0.974136 | 0.668145  | H | 6.888462  | 3.706694  | 0.204080  |
| N | 3.727787  | 2.457420  | 2.306275  | N | 3.851488  | -0.560923 | 1.799391  |

|                 |           |           |           |                 |           |           |           |
|-----------------|-----------|-----------|-----------|-----------------|-----------|-----------|-----------|
| H               | 3.697765  | 3.239264  | 1.652670  | H               | 3.758613  | -1.518923 | 1.463788  |
| H               | 4.586790  | 2.561516  | 2.845789  | H               | 2.931320  | -0.288619 | 2.148111  |
| H               | 2.955884  | 2.598259  | 2.957122  | H               | 4.477903  | -0.592752 | 2.602969  |
| N               | 3.339702  | -3.045037 | -1.121362 | N               | -3.408105 | 3.675590  | 1.231429  |
| H               | 2.628804  | -2.346767 | -1.342980 | H               | -4.298757 | 3.733318  | 0.738020  |
| H               | 3.658543  | -3.423023 | -2.013356 | H               | -3.381255 | 4.470070  | 1.870416  |
| H               | 4.129488  | -2.532054 | -0.726200 | H               | -3.453846 | 2.839076  | 1.812888  |
| <b>Fig. S4s</b> |           |           |           | <b>Fig. S4t</b> |           |           |           |
| N               | -1.462816 | -2.007726 | -1.787752 | N               | -0.327493 | 2.694597  | -0.770757 |
| C               | -0.217522 | -2.251343 | -1.352005 | C               | 0.815479  | 2.019997  | -0.963544 |
| N               | 0.658199  | -1.803270 | -2.247623 | N               | 1.611693  | 2.196764  | 0.087353  |
| C               | -0.040529 | -1.236039 | -3.291599 | C               | 0.960079  | 2.999384  | 0.998708  |
| C               | -1.373086 | -1.362002 | -3.009979 | C               | -0.258567 | 3.316240  | 0.465552  |
| H               | 1.766927  | -1.833214 | -2.107008 | H               | 2.581301  | 1.713513  | 0.203315  |
| C               | -2.702342 | -2.314709 | -1.056059 | C               | -1.480364 | 2.707141  | -1.685914 |
| C               | -3.465712 | -1.048560 | -0.664681 | C               | -2.710813 | 2.045378  | -1.063891 |
| C               | -4.695286 | -1.368123 | 0.192405  | C               | -3.876885 | 1.962259  | -2.054962 |
| C               | -5.457304 | -0.101822 | 0.600301  | C               | -5.107625 | 1.286962  | -1.438287 |
| H               | 0.458490  | -0.793308 | -4.139806 | H               | 1.408479  | 3.274978  | 1.940674  |
| H               | -2.250455 | -1.058576 | -3.559290 | H               | -1.068640 | 3.918267  | 0.845672  |
| H               | 0.020598  | -2.707708 | -0.404989 | H               | 1.028008  | 1.406724  | -1.823880 |
| H               | -2.408268 | -2.872040 | -0.164660 | H               | -1.172103 | 2.168393  | -2.583965 |
| H               | -3.311735 | -2.968595 | -1.688143 | H               | -1.681743 | 3.748158  | -1.958014 |
| H               | -3.773640 | -0.506693 | -1.568544 | H               | -3.021690 | 2.604660  | -0.171956 |
| H               | -2.788181 | -0.391542 | -0.112737 | H               | -2.433628 | 1.041355  | -0.731817 |
| H               | -4.374620 | -1.909899 | 1.093158  | H               | -3.555702 | 1.400470  | -2.943149 |
| H               | -5.365147 | -2.043598 | -0.358533 | H               | -4.141418 | 2.971690  | -2.400573 |
| H               | -6.329327 | -0.344576 | 1.218869  | H               | -5.931960 | 1.229117  | -2.158740 |
| H               | -5.811746 | 0.445770  | -0.282413 | H               | -5.463583 | 1.843597  | -0.561945 |
| H               | -4.812234 | 0.574055  | 1.175339  | H               | -4.871239 | 0.266561  | -1.112029 |
| C               | 1.442860  | -0.696805 | 2.231428  | C               | 1.032570  | -2.270929 | -1.413725 |
| F               | 2.201315  | 0.409300  | 2.276738  | F               | 1.268896  | -3.124807 | -0.405069 |
| S               | -0.336647 | -0.272236 | 1.766886  | S               | -0.614143 | -1.382978 | -1.166041 |
| O               | -0.970637 | -1.591976 | 1.618205  | O               | -0.643495 | -0.408617 | -2.268450 |
| N               | -0.174236 | 0.353824  | 0.288031  | N               | -0.365844 | -0.558658 | 0.199099  |
| S               | 0.066515  | 1.921570  | -0.024546 | S               | -0.671401 | -1.120099 | 1.683309  |
| O               | 0.507343  | 2.764265  | 1.096185  | O               | -0.889782 | -2.567246 | 1.818130  |
| O               | -0.805681 | 0.623826  | 2.832097  | O               | -1.622490 | -2.450493 | -1.136333 |
| F               | 1.467183  | -1.287152 | 3.436710  | F               | 1.005784  | -2.959681 | -2.565443 |
| F               | 1.968932  | -1.540703 | 1.328470  | F               | 2.037037  | -1.381657 | -1.466280 |
| C               | -1.678941 | 2.521814  | -0.420975 | C               | -2.348590 | -0.342265 | 2.062176  |
| F               | -2.504476 | 2.265635  | 0.605534  | F               | -3.248403 | -0.704471 | 1.134888  |
| O               | 0.775502  | 2.024146  | -1.309410 | O               | 0.246629  | -0.453134 | 2.620463  |

|                 |           |           |           |                 |           |           |           |
|-----------------|-----------|-----------|-----------|-----------------|-----------|-----------|-----------|
| F               | -1.658137 | 3.846288  | -0.639676 | F               | -2.774646 | -0.759701 | 3.264885  |
| F               | -2.151473 | 1.911860  | -1.517855 | F               | -2.257993 | 0.995636  | 2.077639  |
| N               | 3.291009  | -1.870793 | -1.786576 | N               | 3.965971  | 0.919216  | 0.291598  |
| H               | 3.887062  | -2.079505 | -2.587533 | H               | 4.735519  | 1.460370  | 0.707166  |
| H               | 3.467136  | -2.587320 | -1.066487 | H               | 4.241986  | 0.634363  | -0.657310 |
| H               | 3.575335  | -0.950331 | -1.408918 | H               | 3.833739  | 0.065188  | 0.850498  |
| N               | 3.508725  | -3.961683 | 0.492820  | N               | 3.191386  | -1.600386 | 1.983450  |
| H               | 4.030912  | -4.834089 | 0.417099  | H               | 3.688412  | -1.996829 | 2.780346  |
| H               | 2.551196  | -4.213591 | 0.735794  | H               | 2.954813  | -2.380354 | 1.371175  |
| H               | 3.887067  | -3.462267 | 1.296945  | H               | 2.306225  | -1.233972 | 2.336369  |
| N               | 3.799018  | 0.922387  | -0.664480 | N               | 6.235221  | 2.636073  | 1.654484  |
| H               | 3.756272  | 0.895853  | 0.353940  | H               | 7.136937  | 2.160203  | 1.654711  |
| H               | 2.936021  | 1.373552  | -0.970797 | H               | 5.992654  | 2.798834  | 2.631395  |
| H               | 4.576758  | 1.544274  | -0.919196 | H               | 6.390410  | 3.553145  | 1.236826  |
| N               | 6.165015  | 2.828740  | -1.523041 | N               | 4.434823  | -0.001800 | -2.687412 |
| H               | 6.103518  | 3.713016  | -1.019282 | H               | 5.242812  | 0.221675  | -3.267703 |
| H               | 6.091780  | 3.053772  | -2.514806 | H               | 3.610354  | 0.300054  | -3.205620 |
| H               | 7.108872  | 2.473241  | -1.374009 | H               | 4.383786  | -1.018531 | -2.635165 |
| <b>Fig. S4u</b> |           |           |           | <b>Fig. S4v</b> |           |           |           |
| N               | -1.256882 | 2.466129  | 0.217168  | N               | -1.562811 | 1.474461  | -1.812132 |
| C               | 0.068034  | 2.649128  | 0.170570  | C               | -0.292111 | 1.117653  | -2.038454 |
| N               | 0.572293  | 2.416431  | 1.380941  | N               | 0.510352  | 2.057867  | -1.543910 |
| C               | -0.451791 | 2.056688  | 2.233232  | C               | -0.262387 | 3.044327  | -0.961424 |
| C               | -1.607949 | 2.086930  | 1.505347  | C               | -1.570516 | 2.684673  | -1.130553 |
| H               | 1.613276  | 2.441686  | 1.571653  | H               | 1.568270  | 1.930681  | -1.450185 |
| C               | -2.177271 | 2.547914  | -0.927128 | C               | -2.743091 | 0.638112  | -2.075109 |
| C               | -2.564633 | 1.159756  | -1.440169 | C               | -3.223861 | -0.051549 | -0.796272 |
| C               | -3.529249 | 1.232902  | -2.628209 | C               | -4.438811 | -0.951501 | -1.042946 |
| C               | -3.920629 | -0.160550 | -3.134244 | C               | -4.901886 | -1.652020 | 0.239966  |
| H               | -0.254247 | 1.793055  | 3.260571  | H               | 0.197861  | 3.879104  | -0.453374 |
| H               | -2.640842 | 1.862521  | 1.747190  | H               | -2.510086 | 3.131217  | -0.823306 |
| H               | 0.634870  | 2.920520  | -0.703671 | H               | 0.016233  | 0.193041  | -2.497978 |
| H               | -1.676921 | 3.130291  | -1.705506 | H               | -2.458415 | -0.097022 | -2.832039 |
| H               | -3.057999 | 3.106657  | -0.598357 | H               | -3.518735 | 1.283471  | -2.496356 |
| H               | -3.025612 | 0.595614  | -0.622547 | H               | -3.469950 | 0.713090  | -0.049250 |
| H               | -1.653560 | 0.624660  | -1.728866 | H               | -2.397844 | -0.645295 | -0.390618 |
| H               | -3.064239 | 1.804893  | -3.443537 | H               | -4.186093 | -1.703763 | -1.803181 |
| H               | -4.432321 | 1.786944  | -2.334089 | H               | -5.262883 | -0.352592 | -1.456635 |
| H               | -4.610719 | -0.096524 | -3.983720 | H               | -5.771190 | -2.293201 | 0.052627  |
| H               | -4.411310 | -0.741188 | -2.342793 | H               | -5.181815 | -0.919193 | 1.007655  |
| H               | -3.035636 | -0.722276 | -3.458221 | H               | -4.101893 | -2.278846 | 0.653473  |
| C               | 2.945161  | -0.944728 | -1.111252 | C               | 2.066806  | -2.708466 | -1.011728 |
| F               | 3.211018  | -2.078855 | -0.453223 | F               | 2.903441  | -2.759452 | 0.034884  |

|                 |           |           |           |   |           |           |           |
|-----------------|-----------|-----------|-----------|---|-----------|-----------|-----------|
| S               | 1.082029  | -0.705248 | -1.335948 | S | 0.337273  | -2.202028 | -0.450413 |
| O               | 0.983894  | 0.633454  | -1.944120 | O | -0.402939 | -2.025332 | -1.710212 |
| N               | 0.518241  | -0.587860 | 0.174091  | N | 0.601152  | -0.733846 | 0.164680  |
| S               | 0.109190  | -1.868530 | 1.077592  | S | 0.943357  | -0.421384 | 1.709833  |
| O               | 0.682811  | -3.164001 | 0.686204  | O | 1.376542  | -1.548934 | 2.546050  |
| O               | 0.651078  | -1.867482 | -2.124783 | O | -0.088638 | -3.255775 | 0.479550  |
| F               | 3.530767  | -0.994823 | -2.319324 | F | 2.020616  | -3.917651 | -1.591311 |
| F               | 3.468881  | 0.085238  | -0.425335 | F | 2.545583  | -1.822135 | -1.901479 |
| C               | -1.743781 | -2.066563 | 0.757337  | C | -0.746391 | 0.067550  | 2.392163  |
| F               | -1.989739 | -2.187076 | -0.554237 | F | -1.614460 | -0.945322 | 2.246575  |
| O               | 0.173065  | -1.461442 | 2.489346  | O | 1.721621  | 0.828236  | 1.754740  |
| F               | -2.181134 | -3.171116 | 1.383809  | F | -0.635899 | 0.359999  | 3.697835  |
| F               | -2.424698 | -1.010712 | 1.229079  | F | -1.222750 | 1.141557  | 1.747273  |
| N               | 3.356223  | 2.547722  | 1.408824  | N | 3.160685  | 1.467237  | -1.060823 |
| H               | 3.821572  | 3.285932  | 1.936130  | H | 3.849422  | 2.225595  | -0.977304 |
| H               | 3.410439  | 2.790638  | 0.407279  | H | 3.553210  | 0.746644  | -1.665578 |
| H               | 3.908076  | 1.699629  | 1.532714  | H | 3.039550  | 1.049666  | -0.137204 |
| N               | 3.207358  | 2.931829  | -1.656629 | N | 5.135605  | 3.892709  | -0.760580 |
| H               | 2.933409  | 3.756337  | -2.190691 | H | 5.610285  | 3.988366  | 0.137089  |
| H               | 2.585845  | 2.172732  | -1.938822 | H | 4.855631  | 4.832209  | -1.042296 |
| H               | 4.139692  | 2.676865  | -1.982370 | H | 5.847645  | 3.596207  | -1.428591 |
| N               | 1.864385  | 0.674607  | 4.082199  | N | 2.215569  | 3.989707  | 1.023503  |
| H               | 2.543711  | 1.156843  | 3.494454  | H | 3.062049  | 3.882528  | 0.462814  |
| H               | 1.433123  | -0.047923 | 3.503349  | H | 1.947543  | 3.051164  | 1.321781  |
| H               | 2.397323  | 0.193547  | 4.806173  | H | 2.487552  | 4.495149  | 1.866324  |
| N               | -4.801954 | 1.216207  | 1.462016  | N | -4.714604 | 3.255764  | -0.275726 |
| H               | -4.655604 | 0.207067  | 1.446851  | H | -4.773961 | 2.952587  | 0.696190  |
| H               | -5.297600 | 1.448141  | 0.601356  | H | -5.353478 | 2.659350  | -0.801179 |
| H               | -5.451879 | 1.401324  | 2.225900  | H | -5.108597 | 4.195967  | -0.307560 |
| <b>Fig. S4w</b> |           |           |           |   |           |           |           |
| N               | -0.351810 | 2.072990  | -1.393528 |   |           |           |           |
| C               | 0.916076  | 1.638576  | -1.362453 |   |           |           |           |
| N               | 1.513954  | 2.120789  | -0.275621 |   |           |           |           |
| C               | 0.598320  | 2.874074  | 0.427708  |   |           |           |           |
| C               | -0.577638 | 2.853291  | -0.269694 |   |           |           |           |
| H               | 2.524155  | 1.850329  | 0.043881  |   |           |           |           |
| C               | -1.356207 | 1.714598  | -2.407022 |   |           |           |           |
| C               | -2.538917 | 0.963239  | -1.794675 |   |           |           |           |
| C               | -3.545830 | 0.512468  | -2.857905 |   |           |           |           |
| C               | -4.728472 | -0.244145 | -2.241349 |   |           |           |           |
| H               | 0.851483  | 3.348844  | 1.362762  |   |           |           |           |
| H               | -1.550680 | 3.288097  | -0.065963 |   |           |           |           |
| H               | 1.358694  | 0.975359  | -2.087569 |   |           |           |           |

|   |           |           |           |
|---|-----------|-----------|-----------|
| H | -0.848163 | 1.092881  | -3.147534 |
| H | -1.684359 | 2.636978  | -2.897202 |
| H | -3.037868 | 1.607124  | -1.061660 |
| H | -2.154493 | 0.094545  | -1.253732 |
| H | -3.038650 | -0.132016 | -3.589599 |
| H | -3.914501 | 1.387010  | -3.413080 |
| H | -5.439279 | -0.568119 | -3.010675 |
| H | -5.270338 | 0.388609  | -1.526576 |
| H | -4.383534 | -1.135399 | -1.702421 |
| C | 1.918921  | -2.344264 | -0.514217 |
| F | 2.182993  | -2.795463 | 0.720597  |
| S | 0.099925  | -1.868088 | -0.679478 |
| O | 0.024106  | -1.272253 | -2.022995 |
| N | -0.045347 | -0.670927 | 0.391128  |
| S | -0.455242 | -0.863922 | 1.942051  |
| O | -0.377132 | -2.228464 | 2.485182  |
| O | -0.642950 | -3.107956 | -0.413473 |
| F | 2.217188  | -3.308479 | -1.400821 |
| F | 2.702275  | -1.280389 | -0.758838 |
| C | -2.303122 | -0.473986 | 1.908703  |
| F | -2.937329 | -1.275222 | 1.038652  |
| O | 0.125866  | 0.241551  | 2.715535  |
| F | -2.824239 | -0.666160 | 3.131836  |
| F | -2.514099 | 0.802372  | 1.549931  |
| N | 4.001266  | 1.338055  | 0.479840  |
| H | 4.608574  | 2.069720  | 0.876541  |
| H | 4.463795  | 0.937042  | -0.348793 |
| H | 3.923725  | 0.592791  | 1.172100  |
| N | 5.740409  | 3.611306  | 1.704735  |
| H | 5.494409  | 3.756168  | 2.683618  |
| H | 5.604180  | 4.506196  | 1.235487  |
| H | 6.741679  | 3.420339  | 1.681946  |
| N | 5.063380  | 0.047994  | -2.142510 |
| H | 5.240773  | -0.935313 | -1.939893 |
| H | 5.862620  | 0.384968  | -2.678492 |
| H | 4.259932  | 0.071174  | -2.769764 |
| N | -3.710263 | 3.710644  | 0.441686  |
| H | -4.459081 | 3.688875  | -0.250299 |
| H | -3.866800 | 4.543508  | 1.009142  |
| H | -3.861338 | 2.910438  | 1.055728  |



**[Tf<sub>2</sub>N]<sup>-</sup>...NH<sub>3</sub>**

| <b>Fig. S5a</b> |           |           |           | <b>Fig. S5b</b> |           |           |           |
|-----------------|-----------|-----------|-----------|-----------------|-----------|-----------|-----------|
| C               | 2.656732  | -0.102706 | -0.365670 | C               | -2.649003 | -0.408925 | -0.175580 |
| F               | 2.241390  | 0.166201  | -1.611743 | F               | -2.358707 | -1.716336 | -0.247104 |
| S               | 1.229426  | 0.053466  | 0.861325  | S               | -1.175403 | 0.563142  | 0.496133  |
| O               | 1.794319  | -0.439861 | 2.125163  | O               | -1.586711 | 1.967800  | 0.343674  |
| N               | 0.174489  | -1.052707 | 0.326527  | N               | -0.022493 | 0.267178  | -0.601099 |
| S               | -1.023418 | -0.741417 | -0.716454 | S               | 1.034064  | -0.956351 | -0.501289 |
| O               | -0.857012 | 0.428666  | -1.593690 | O               | 0.677026  | -2.077897 | 0.379748  |
| O               | 0.823523  | 1.464542  | 0.769306  | O               | -0.965553 | 0.030561  | 1.850185  |
| F               | 3.624135  | 0.769534  | -0.035046 | F               | -3.703273 | -0.244724 | 0.641343  |
| F               | 3.169456  | -1.342377 | -0.339981 | F               | -2.981824 | 0.026560  | -1.399788 |
| C               | -2.461823 | -0.283309 | 0.422306  | C               | 2.515191  | -0.144926 | 0.345083  |
| F               | -2.130061 | 0.741971  | 1.219704  | F               | 2.164572  | 0.357524  | 1.537807  |
| O               | -1.440786 | -2.017004 | -1.314526 | O               | 1.520522  | -1.242391 | -1.858116 |
| F               | -3.523011 | 0.074358  | -0.321355 | F               | 3.483180  | -1.057930 | 0.527475  |
| F               | -2.806511 | -1.329943 | 1.187669  | F               | 3.004518  | 0.851194  | -0.412966 |
| N               | -1.297298 | 3.439150  | -0.635058 | N               | 0.943783  | 3.500188  | -0.926104 |
| H               | -1.458685 | 2.600841  | -1.192813 | H               | 1.338013  | 2.574818  | -1.089330 |
| H               | -2.192388 | 3.684275  | -0.212713 | H               | 0.070243  | 3.327461  | -0.428439 |
| H               | -0.693819 | 3.124641  | 0.124222  | H               | 1.568540  | 3.969430  | -0.271162 |
| <b>Fig. S5c</b> |           |           |           |                 |           |           |           |
| C               | -2.809942 | 0.713407  | -0.050110 |                 |           |           |           |
| F               | -2.304646 | 1.560302  | -0.959274 |                 |           |           |           |
| S               | -1.623988 | -0.725234 | 0.254255  |                 |           |           |           |
| O               | -2.226583 | -1.444831 | 1.385203  |                 |           |           |           |
| N               | -0.294803 | 0.025191  | 0.798854  |                 |           |           |           |
| S               | 0.931579  | 0.493377  | -0.145361 |                 |           |           |           |
| O               | 0.649721  | 0.675231  | -1.576452 |                 |           |           |           |
| O               | -1.522106 | -1.401823 | -1.047396 |                 |           |           |           |
| F               | -3.980152 | 0.236688  | -0.508017 |                 |           |           |           |
| F               | -3.036831 | 1.387888  | 1.087281  |                 |           |           |           |
| C               | 2.096661  | -0.992734 | -0.077197 |                 |           |           |           |
| F               | 1.485504  | -2.093716 | -0.536937 |                 |           |           |           |
| O               | 1.667581  | 1.547969  | 0.570894  |                 |           |           |           |
| F               | 3.177252  | -0.748520 | -0.839914 |                 |           |           |           |
| F               | 2.502996  | -1.218095 | 1.181374  |                 |           |           |           |
| N               | 4.864543  | 1.898569  | 0.332477  |                 |           |           |           |
| H               | 3.847080  | 1.863758  | 0.404253  |                 |           |           |           |
| H               | 5.224167  | 1.916187  | 1.286364  |                 |           |           |           |
| H               | 5.152798  | 1.006119  | -0.067019 |                 |           |           |           |

**[SCN]<sup>-</sup>...NH<sub>3</sub>**

| <b>Fig. S6a</b> |           |           |           | <b>Fig. S6b</b> |           |           |           |
|-----------------|-----------|-----------|-----------|-----------------|-----------|-----------|-----------|
| C               | 0.615435  | -0.295487 | -0.008491 | C               | -1.020837 | 0.579396  | -0.000015 |
| N               | -0.503882 | -0.677915 | -0.020759 | N               | -1.176909 | 1.751478  | -0.000020 |
| S               | 2.190702  | 0.242252  | 0.008589  | S               | -0.793731 | -1.072447 | 0.000008  |
| N               | -3.593394 | 0.176735  | -0.018701 | N               | 2.789001  | 0.059333  | 0.000078  |
| H               | -2.612486 | -0.117248 | -0.018961 | H               | 1.843478  | -0.329913 | -0.000184 |
| H               | -3.778954 | 0.581884  | 0.898510  | H               | 2.848663  | 0.668195  | -0.815703 |
| H               | -3.671460 | 0.940518  | -0.689804 | H               | 2.847928  | 0.668817  | 0.815447  |

**[NO<sub>3</sub>]<sup>-</sup>...NH<sub>3</sub>**

|   |           |           |           |
|---|-----------|-----------|-----------|
| N | -0.901222 | 0.002501  | -0.038818 |
| O | -2.102576 | -0.189403 | 0.293497  |
| O | -0.452454 | 1.175953  | -0.156665 |
| O | -0.139316 | -0.985745 | -0.254694 |
| N | 2.846991  | -0.014401 | 0.023396  |
| H | 3.197445  | -0.617253 | 0.767441  |
| H | 1.857042  | -0.243871 | -0.102342 |
| H | 2.879891  | 0.937986  | 0.385753  |

**[Blm][Tf<sub>2</sub>N]**

| <b>Fig. S7a</b> |          |           |           | <b>Fig. S7b</b> |          |           |           |
|-----------------|----------|-----------|-----------|-----------------|----------|-----------|-----------|
| N               | 3.431094 | -0.136350 | 0.989030  | N               | 3.470254 | -1.170957 | -0.339775 |
| C               | 2.247781 | -0.423209 | 0.432324  | C               | 2.420398 | -0.500501 | -0.829677 |
| N               | 1.309347 | 0.301462  | 1.044566  | N               | 1.344348 | -0.825650 | -0.110802 |
| C               | 1.895767 | 1.079395  | 2.019605  | C               | 1.700544 | -1.724658 | 0.870212  |
| C               | 3.233997 | 0.807644  | 1.985165  | C               | 3.041451 | -1.942167 | 0.729750  |
| H               | 0.302007 | 0.262025  | 0.800968  | H               | 0.404460 | -0.453838 | -0.280071 |
| C               | 4.733320 | -0.679315 | 0.562439  | C               | 4.862212 | -1.056498 | -0.812317 |
| C               | 5.502564 | 0.304632  | -0.323476 | C               | 5.712529 | -0.191629 | 0.122228  |
| C               | 6.854911 | -0.271270 | -0.762876 | C               | 7.160963 | -0.082019 | -0.371435 |
| C               | 7.642888 | 0.704606  | -1.644429 | C               | 8.026607 | 0.777113  | 0.557464  |
| H               | 1.320967 | 1.742840  | 2.646099  | H               | 0.976552 | -2.121232 | 1.562805  |
| H               | 4.051785 | 1.189686  | 2.575930  | H               | 3.720549 | -2.570563 | 1.284160  |
| H               | 2.069247 | -1.119264 | -0.372475 | H               | 2.440530 | 0.184159  | -1.663394 |
| H               | 4.532580 | -1.613844 | 0.032961  | H               | 4.825656 | -0.633876 | -1.819406 |
| H               | 5.294705 | -0.920426 | 1.469192  | H               | 5.261804 | -2.071585 | -0.887953 |
| H               | 5.658574 | 1.242177  | 0.226184  | H               | 5.696324 | -0.624188 | 1.131205  |
| H               | 4.892663 | 0.545184  | -1.204242 | H               | 5.263080 | 0.807524  | 0.193287  |
| H               | 6.689886 | -1.210497 | -1.308991 | H               | 7.169098 | 0.345785  | -1.383618 |
| H               | 7.448249 | -0.526448 | 0.126266  | H               | 7.594597 | -1.088413 | -0.453520 |

|                 |           |           |           |                 |           |           |           |
|-----------------|-----------|-----------|-----------|-----------------|-----------|-----------|-----------|
| H               | 8.602763  | 0.272890  | -1.950625 | H               | 9.056197  | 0.843972  | 0.187409  |
| H               | 7.849607  | 1.639817  | -1.108868 | H               | 8.059027  | 0.352977  | 1.568999  |
| H               | 7.081178  | 0.955753  | -2.553000 | H               | 7.629137  | 1.797013  | 0.634126  |
| C               | -2.350685 | 2.449808  | -0.658279 | C               | -3.236994 | -1.988877 | -0.418894 |
| F               | -2.525095 | 2.003114  | -1.908512 | F               | -2.527548 | -1.866055 | -1.550510 |
| S               | -2.577517 | 1.045932  | 0.584850  | S               | -2.673555 | -0.707057 | 0.848226  |
| O               | -2.199683 | 1.641382  | 1.872484  | O               | -3.624964 | -0.841923 | 1.955304  |
| N               | -1.385431 | 0.019737  | 0.169738  | N               | -2.966024 | 0.694476  | 0.091057  |
| S               | -1.516143 | -1.201606 | -0.893799 | S               | -1.871469 | 1.474597  | -0.802638 |
| O               | -2.585363 | -1.091913 | -1.890656 | O               | -0.736374 | 0.667343  | -1.302110 |
| O               | -3.945320 | 0.560389  | 0.374289  | O               | -1.255905 | -1.033693 | 1.087687  |
| F               | -3.249481 | 3.413389  | -0.408168 | F               | -3.046590 | -3.220491 | 0.080170  |
| F               | -1.117258 | 2.966953  | -0.550402 | F               | -4.536466 | -1.830657 | -0.700747 |
| C               | -2.006201 | -2.654520 | 0.208866  | C               | -1.072245 | 2.658680  | 0.432178  |
| F               | -3.183544 | -2.418801 | 0.800354  | F               | -0.464755 | 1.964204  | 1.406630  |
| O               | -0.147081 | -1.527568 | -1.322683 | O               | -2.570816 | 2.345917  | -1.750723 |
| F               | -2.104157 | -3.764831 | -0.537205 | F               | -0.155977 | 3.408084  | -0.200690 |
| F               | -1.074598 | -2.847380 | 1.154704  | F               | -1.991441 | 3.463663  | 0.977912  |
| <b>Fig. S7c</b> |           |           |           | <b>Fig. S7d</b> |           |           |           |
| N               | -3.602033 | 0.854724  | 0.512436  | N               | -2.688915 | -0.666118 | -1.411005 |
| C               | -2.717503 | 1.384055  | -0.340273 | C               | -1.949993 | 0.340591  | -1.883022 |
| N               | -1.510019 | 0.893761  | -0.049658 | N               | -2.732527 | 1.419461  | -1.977036 |
| C               | -1.611318 | 0.023236  | 1.016105  | C               | -4.008923 | 1.106535  | -1.552810 |
| C               | -2.930104 | -0.003681 | 1.368958  | C               | -3.981370 | -0.209825 | -1.195255 |
| H               | -0.645104 | 1.143639  | -0.543121 | H               | -2.398490 | 2.335885  | -2.253044 |
| C               | -5.057140 | 1.090086  | 0.500301  | C               | -2.178742 | -2.005373 | -1.056533 |
| C               | -5.818754 | -0.063408 | -0.158345 | C               | -2.011628 | -2.159057 | 0.456651  |
| C               | -7.333014 | 0.181866  | -0.144294 | C               | -1.526542 | -3.563842 | 0.830435  |
| C               | -8.112406 | -0.959983 | -0.806628 | C               | -1.264504 | -3.697065 | 2.334773  |
| H               | -0.748991 | -0.482806 | 1.419743  | H               | -4.807915 | 1.830452  | -1.545278 |
| H               | -3.444979 | -0.544310 | 2.147518  | H               | -4.756577 | -0.856375 | -0.815274 |
| H               | -2.942818 | 2.089699  | -1.124794 | H               | -0.893376 | 0.301231  | -2.091228 |
| H               | -5.226688 | 2.029545  | -0.031561 | H               | -1.218912 | -2.127915 | -1.562452 |
| H               | -5.367539 | 1.229973  | 1.539317  | H               | -2.882094 | -2.737732 | -1.462447 |
| H               | -5.589634 | -0.998924 | 0.368683  | H               | -2.965640 | -1.945957 | 0.956961  |
| H               | -5.465760 | -0.181292 | -1.191316 | H               | -1.288802 | -1.413106 | 0.802688  |
| H               | -7.553758 | 1.126968  | -0.659744 | H               | -0.603302 | -3.780246 | 0.279321  |
| H               | -7.671179 | 0.305533  | 0.893993  | H               | -2.273278 | -4.305964 | 0.514536  |
| H               | -9.191026 | -0.766110 | -0.784523 | H               | -0.923319 | -4.707385 | 2.589237  |
| H               | -7.930415 | -1.911395 | -0.291059 | H               | -2.172834 | -3.491485 | 2.915802  |
| H               | -7.813767 | -1.084199 | -1.855170 | H               | -0.491310 | -2.988883 | 2.658228  |
| C               | 1.735761  | -2.688512 | -0.448936 | C               | -0.700539 | 1.668633  | 1.629905  |
| F               | 2.211281  | -2.399544 | -1.667374 | F               | -0.279076 | 0.779967  | 2.539499  |

|   |          |           |           |   |           |           |           |
|---|----------|-----------|-----------|---|-----------|-----------|-----------|
| S | 2.212011 | -1.342897 | 0.788146  | S | 0.564369  | 1.853688  | 0.238022  |
| O | 1.498009 | -1.724046 | 2.014889  | O | -0.150333 | 2.652261  | -0.771822 |
| N | 1.460157 | -0.035936 | 0.196140  | N | 0.675983  | 0.348167  | -0.341693 |
| S | 2.077197 | 1.005486  | -0.866624 | S | 1.757128  | -0.760666 | 0.133544  |
| O | 3.151532 | 0.538746  | -1.748823 | O | 2.317917  | -0.598467 | 1.481568  |
| O | 3.679896 | -1.316104 | 0.778238  | O | 1.757140  | 2.415506  | 0.883738  |
| F | 2.247943 | -3.862019 | -0.047908 | F | -0.884855 | 2.853962  | 2.230137  |
| F | 0.400231 | -2.800678 | -0.521040 | F | -1.878538 | 1.250241  | 1.134888  |
| C | 2.871046 | 2.328821  | 0.221214  | C | 3.209322  | -0.458301 | -1.035817 |
| F | 3.874218 | 1.805019  | 0.936092  | F | 3.708568  | 0.773501  | -0.864895 |
| O | 0.914080 | 1.702870  | -1.461692 | O | 1.239000  | -2.072121 | -0.277851 |
| F | 3.352449 | 3.311670  | -0.554587 | F | 4.174636  | -1.357112 | -0.784871 |
| F | 1.960549 | 2.844197  | 1.059898  | F | 2.816802  | -0.591964 | -2.312424 |

**Fig. S7e**

|   |           |           |           |
|---|-----------|-----------|-----------|
| N | -1.736255 | 2.497912  | -0.713393 |
| C | -0.430681 | 2.454782  | -0.986706 |
| N | 0.073900  | 3.675685  | -0.774704 |
| C | -0.928838 | 4.527187  | -0.349530 |
| C | -2.070257 | 3.782458  | -0.309564 |
| H | 1.047281  | 3.926021  | -0.904585 |
| C | -2.658860 | 1.346761  | -0.764739 |
| C | -3.009281 | 0.837895  | 0.635420  |
| C | -4.013081 | -0.320180 | 0.571200  |
| C | -4.317698 | -0.898647 | 1.957409  |
| H | -0.745427 | 5.565387  | -0.123790 |
| H | -3.080053 | 4.047840  | -0.039084 |
| H | 0.108975  | 1.574322  | -1.297236 |
| H | -2.162248 | 0.569601  | -1.348625 |
| H | -3.550027 | 1.675307  | -1.307453 |
| H | -3.431146 | 1.658965  | 1.230573  |
| H | -2.086744 | 0.515464  | 1.130991  |
| H | -3.614620 | -1.111568 | -0.076446 |
| H | -4.943843 | 0.029017  | 0.102425  |
| H | -5.042902 | -1.718328 | 1.893729  |
| H | -4.733986 | -0.130971 | 2.622206  |
| H | -3.406414 | -1.290051 | 2.425878  |
| C | -0.782441 | -2.694648 | -0.261305 |
| F | -1.253807 | -2.006479 | 0.788634  |
| S | 0.647979  | -1.761325 | -1.068410 |
| O | 1.237323  | -2.732637 | -1.997061 |
| N | 1.672312  | -1.551329 | 0.164370  |
| S | 1.677749  | -0.245818 | 1.121718  |
| O | 0.454595  | 0.573233  | 1.128647  |

**Fig. S7f**

|   |           |           |           |
|---|-----------|-----------|-----------|
| N | 1.681850  | -1.858481 | 1.324271  |
| C | 0.441867  | -2.230104 | 1.646055  |
| N | 0.131423  | -1.669014 | 2.818638  |
| C | 1.188764  | -0.897903 | 3.256800  |
| C | 2.168072  | -1.020364 | 2.316226  |
| H | -0.766962 | -1.757819 | 3.278470  |
| C | 2.389003  | -2.228420 | 0.082910  |
| C | 2.732882  | -1.002308 | -0.763678 |
| C | 3.366371  | -1.401007 | -2.101129 |
| C | 3.702951  | -0.177761 | -2.962071 |
| H | 1.150924  | -0.338763 | 4.177527  |
| H | 3.155001  | -0.589837 | 2.266278  |
| H | -0.203120 | -2.848808 | 1.044506  |
| H | 1.724280  | -2.898503 | -0.464922 |
| H | 3.287686  | -2.783405 | 0.368491  |
| H | 3.419356  | -0.348306 | -0.211335 |
| H | 1.817603  | -0.431483 | -0.941079 |
| H | 2.673491  | -2.055901 | -2.647229 |
| H | 4.276999  | -1.988799 | -1.918289 |
| H | 4.150988  | -0.476315 | -3.916958 |
| H | 4.413096  | 0.482156  | -2.447645 |
| H | 2.800625  | 0.406937  | -3.180039 |
| C | -2.965961 | -1.002515 | -0.536929 |
| F | -3.683816 | 0.067656  | -0.170227 |
| S | -1.229349 | -0.491977 | -1.074177 |
| O | -0.536437 | -1.778235 | -1.257721 |
| N | -0.625600 | 0.183744  | 0.261702  |
| S | -0.758131 | 1.749880  | 0.648203  |
| O | -1.773341 | 2.527471  | -0.076576 |

|                 |           |           |           |                 |           |           |           |
|-----------------|-----------|-----------|-----------|-----------------|-----------|-----------|-----------|
| O               | 0.022541  | -0.546600 | -1.625025 | O               | -1.432620 | 0.379062  | -2.238881 |
| F               | -1.773617 | -2.854554 | -1.153643 | F               | -3.590191 | -1.617950 | -1.553072 |
| F               | -0.378169 | -3.900779 | 0.158035  | F               | -2.897209 | -1.852081 | 0.503550  |
| C               | 2.965037  | 0.853455  | 0.284335  | C               | 0.892781  | 2.442798  | 0.047298  |
| F               | 2.570747  | 1.151273  | -0.969308 | F               | 1.049044  | 2.212370  | -1.265192 |
| O               | 2.296929  | -0.614800 | 2.399941  | O               | -0.679809 | 1.864598  | 2.110895  |
| F               | 3.097552  | 1.999633  | 0.971464  | F               | 0.926863  | 3.767725  | 0.261497  |
| F               | 4.153438  | 0.241956  | 0.226312  | F               | 1.913450  | 1.874612  | 0.707988  |
| <b>Fig. S7g</b> |           |           |           | <b>Fig. S7h</b> |           |           |           |
| N               | 2.873738  | -2.007181 | 0.047374  | N               | 2.001183  | -0.397223 | 1.108602  |
| C               | 1.548554  | -1.955969 | -0.121621 | C               | 1.473277  | 0.377750  | 2.056721  |
| N               | 0.969388  | -2.484812 | 0.960046  | N               | 0.843470  | -0.409358 | 2.933179  |
| C               | 1.941044  | -2.883700 | 1.854044  | C               | 0.951336  | -1.725558 | 2.532023  |
| C               | 3.142761  | -2.581386 | 1.280542  | C               | 1.681915  | -1.716574 | 1.380730  |
| H               | -0.047743 | -2.534890 | 1.078219  | H               | 0.310506  | -0.068274 | 3.724203  |
| C               | 3.874356  | -1.452103 | -0.883284 | C               | 2.714895  | 0.077281  | -0.089334 |
| C               | 4.341958  | -0.060298 | -0.447962 | C               | 4.187362  | -0.336282 | -0.086876 |
| C               | 5.374055  | 0.519819  | -1.423241 | C               | 4.907230  | 0.153415  | -1.349882 |
| C               | 5.840049  | 1.919605  | -1.006388 | C               | 6.384992  | -0.253259 | -1.373221 |
| H               | 1.699649  | -3.342761 | 2.799447  | H               | 0.498966  | -2.534379 | 3.082501  |
| H               | 4.152407  | -2.724323 | 1.632378  | H               | 1.976924  | -2.518567 | 0.724454  |
| H               | 1.024465  | -1.546572 | -0.972162 | H               | 1.521852  | 1.453333  | 2.096731  |
| H               | 3.409726  | -1.422572 | -1.872025 | H               | 2.610372  | 1.164495  | -0.111526 |
| H               | 4.706231  | -2.160342 | -0.922695 | H               | 2.180132  | -0.332134 | -0.950186 |
| H               | 4.775075  | -0.121744 | 0.559139  | H               | 4.260206  | -1.430020 | -0.022618 |
| H               | 3.471315  | 0.604163  | -0.384017 | H               | 4.676366  | 0.071706  | 0.807653  |
| H               | 4.938280  | 0.561579  | -2.431158 | H               | 4.824596  | 1.247416  | -1.414537 |
| H               | 6.238967  | -0.155401 | -1.483744 | H               | 4.399011  | -0.250792 | -2.236362 |
| H               | 6.576238  | 2.317814  | -1.714159 | H               | 6.878913  | 0.105549  | -2.283637 |
| H               | 6.304378  | 1.900407  | -0.012265 | H               | 6.493090  | -1.344775 | -1.339047 |
| H               | 4.995763  | 2.619380  | -0.968693 | H               | 6.922099  | 0.163912  | -0.511910 |
| C               | -3.772902 | -0.870379 | -0.713975 | C               | -2.173314 | -2.285836 | -0.360149 |
| F               | -4.076504 | 0.255448  | -1.370881 | F               | -3.292198 | -1.773889 | 0.173354  |
| S               | -1.977414 | -0.817649 | -0.132893 | S               | -1.123739 | -0.917584 | -1.130190 |
| O               | -1.847050 | -2.038175 | 0.693908  | O               | 0.134343  | -1.591775 | -1.484528 |
| N               | -1.917592 | 0.445862  | 0.862575  | N               | -0.823040 | 0.044232  | 0.133117  |
| S               | -1.522342 | 1.951530  | 0.393065  | S               | -1.691958 | 1.342053  | 0.539143  |
| O               | -1.732224 | 2.272570  | -1.025001 | O               | -3.086263 | 1.390731  | 0.079029  |
| O               | -1.172687 | -0.745336 | -1.364033 | O               | -1.963248 | -0.366852 | -2.203478 |
| F               | -3.939857 | -1.916518 | -1.536608 | F               | -2.512240 | -3.174635 | -1.308431 |
| F               | -4.597048 | -1.002298 | 0.332806  | F               | -1.490210 | -2.924139 | 0.602442  |
| C               | 0.354942  | 1.974121  | 0.613033  | C               | -0.822628 | 2.727650  | -0.405920 |
| F               | 0.939492  | 1.119697  | -0.243918 | F               | -0.858178 | 2.498719  | -1.725147 |

|                 |           |           |           |                 |           |           |           |
|-----------------|-----------|-----------|-----------|-----------------|-----------|-----------|-----------|
| O               | -2.011241 | 2.875220  | 1.423111  | O               | -1.392854 | 1.647605  | 1.947256  |
| F               | 0.815588  | 3.209892  | 0.368442  | F               | -1.425758 | 3.898416  | -0.150124 |
| F               | 0.692698  | 1.624177  | 1.862185  | F               | 0.465319  | 2.816445  | -0.021431 |
| <b>Fig. S7i</b> |           |           |           | <b>Fig. S7j</b> |           |           |           |
| N               | 3.148781  | -0.337884 | -0.489995 | N               | 4.106958  | 0.709743  | 0.513820  |
| C               | 4.447378  | -0.293636 | -0.795760 | C               | 5.401394  | 0.974677  | 0.322029  |
| N               | 4.683027  | 0.860854  | -1.430978 | N               | 6.021550  | -0.177101 | 0.038020  |
| C               | 3.506887  | 1.578960  | -1.534866 | C               | 5.103918  | -1.209416 | 0.044305  |
| C               | 2.540170  | 0.823362  | -0.938948 | C               | 3.895715  | -0.649517 | 0.341300  |
| H               | 5.588264  | 1.148861  | -1.784653 | H               | 7.014709  | -0.265954 | -0.144359 |
| C               | 2.465381  | -1.413058 | 0.257056  | C               | 3.050528  | 1.706338  | 0.785607  |
| C               | 2.164489  | -0.993148 | 1.697009  | C               | 2.308513  | 2.102142  | -0.492524 |
| C               | 1.366932  | -2.071783 | 2.439610  | C               | 1.133805  | 3.040497  | -0.191082 |
| C               | 1.051731  | -1.664038 | 3.883110  | C               | 0.378032  | 3.440524  | -1.462603 |
| H               | 3.462782  | 2.541663  | -2.018301 | H               | 5.386625  | -2.230957 | -0.153292 |
| H               | 1.483768  | 0.981626  | -0.794076 | H               | 2.911670  | -1.076362 | 0.456250  |
| H               | 5.178757  | -1.054365 | -0.572046 | H               | 5.865298  | 1.946671  | 0.384405  |
| H               | 3.113373  | -2.292434 | 0.220572  | H               | 3.531700  | 2.566808  | 1.256994  |
| H               | 1.548348  | -1.635131 | -0.290359 | H               | 2.367999  | 1.249920  | 1.504633  |
| H               | 1.584250  | -0.064406 | 1.687342  | H               | 1.928775  | 1.199007  | -0.982512 |
| H               | 3.109616  | -0.791547 | 2.219363  | H               | 3.011738  | 2.584718  | -1.184740 |
| H               | 1.927148  | -3.017919 | 2.432204  | H               | 1.501126  | 3.939215  | 0.324627  |
| H               | 0.430606  | -2.255338 | 1.898229  | H               | 0.443756  | 2.538543  | 0.500229  |
| H               | 0.477078  | -2.443757 | 4.397168  | H               | -0.458375 | 4.109883  | -1.230971 |
| H               | 0.462739  | -0.739683 | 3.900332  | H               | -0.028436 | 2.552999  | -1.960409 |
| H               | 1.972422  | -1.492474 | 4.455888  | H               | 1.039840  | 3.958437  | -2.168760 |
| C               | -1.085821 | 2.760771  | 0.235303  | C               | -0.118230 | -2.642979 | -0.325294 |
| F               | -1.611566 | 2.867079  | -0.992647 | F               | -1.072375 | -3.032283 | -1.181079 |
| S               | -1.400408 | 1.042184  | 0.954543  | S               | -0.299660 | -0.812312 | 0.097924  |
| O               | -0.682988 | 1.063686  | 2.235773  | O               | 0.758991  | -0.595223 | 1.099382  |
| N               | -0.567982 | 0.084522  | -0.053901 | N               | -1.718846 | -0.744516 | 0.863573  |
| S               | -1.182081 | -0.616489 | -1.377009 | S               | -3.129523 | -0.433378 | 0.124565  |
| O               | -2.361034 | 0.014459  | -1.984794 | O               | -3.186284 | -0.676486 | -1.324261 |
| O               | -2.862260 | 0.896990  | 0.950587  | O               | -0.194212 | -0.121409 | -1.194315 |
| F               | -1.642619 | 3.688954  | 1.028443  | F               | 1.084381  | -2.842033 | -0.897351 |
| F               | 0.236060  | 2.998196  | 0.157415  | F               | -0.194282 | -3.396856 | 0.781229  |
| C               | -1.810795 | -2.277726 | -0.732977 | C               | -3.274042 | 1.441806  | 0.300372  |
| F               | -2.735570 | -2.100222 | 0.219489  | F               | -2.247992 | 2.053028  | -0.308328 |
| O               | -0.040882 | -0.982529 | -2.230437 | O               | -4.205255 | -0.954454 | 0.978633  |
| F               | -2.356845 | -2.968627 | -1.746347 | F               | -4.420866 | 1.855051  | -0.264486 |
| F               | -0.796897 | -2.995127 | -0.221283 | F               | -3.280071 | 1.796134  | 1.594685  |

**[BIm][SCN]**

|                 |           |           |           |                 |           |           |           |
|-----------------|-----------|-----------|-----------|-----------------|-----------|-----------|-----------|
| <b>Fig. S8a</b> |           |           |           | <b>Fig. S8b</b> |           |           |           |
| N               | 1.336434  | 0.682851  | 0.447418  | N               | 0.721611  | 0.836370  | 0.502298  |
| C               | 0.179849  | 0.024619  | 0.606875  | C               | -0.455801 | 0.212633  | 0.376245  |
| N               | -0.789469 | 0.710750  | 0.000643  | N               | -1.342920 | 1.088948  | -0.104422 |
| C               | -0.248155 | 1.842748  | -0.569054 | C               | -0.726738 | 2.307356  | -0.296765 |
| C               | 1.089731  | 1.827828  | -0.292309 | C               | 0.575604  | 2.149482  | 0.082051  |
| H               | -1.802274 | 0.426880  | -0.023861 | H               | -2.334688 | 0.859170  | -0.284395 |
| C               | 2.656827  | 0.234121  | 0.923519  | C               | 1.980427  | 0.209323  | 0.946014  |
| C               | 3.510575  | -0.344514 | -0.208041 | C               | 2.879773  | -0.166201 | -0.234827 |
| C               | 4.880524  | -0.810226 | 0.302112  | C               | 4.190801  | -0.808453 | 0.236414  |
| C               | 5.751130  | -1.390492 | -0.818156 | C               | 5.099396  | -1.198734 | -0.935061 |
| H               | -0.851039 | 2.554905  | -1.110034 | H               | -1.257986 | 3.166758  | -0.673761 |
| H               | 1.876584  | 2.520183  | -0.546823 | H               | 1.399522  | 2.845597  | 0.095795  |
| H               | 0.057332  | -0.904715 | 1.141488  | H               | -0.667243 | -0.818906 | 0.617781  |
| H               | 2.480084  | -0.511157 | 1.702994  | H               | 1.709955  | -0.671933 | 1.532817  |
| H               | 3.144055  | 1.096557  | 1.387166  | H               | 2.475309  | 0.919756  | 1.613842  |
| H               | 3.644636  | 0.415787  | -0.988894 | H               | 3.097382  | 0.733180  | -0.825880 |
| H               | 2.974500  | -1.185916 | -0.666610 | H               | 2.337177  | -0.859455 | -0.890853 |
| H               | 4.738660  | -1.565335 | 1.087888  | H               | 3.963840  | -1.699072 | 0.838892  |
| H               | 5.400358  | 0.036240  | 0.772322  | H               | 4.721250  | -0.109666 | 0.898240  |
| H               | 6.723777  | -1.717735 | -0.432927 | H               | 6.029424  | -1.655795 | -0.577744 |
| H               | 5.932852  | -0.644037 | -1.601702 | H               | 5.364984  | -0.320530 | -1.537080 |
| H               | 5.265496  | -2.256166 | -1.286073 | H               | 4.601537  | -1.920006 | -1.595248 |
| N               | -3.449885 | -0.048681 | -0.055344 | N               | -2.678780 | -2.383298 | 0.511324  |
| C               | -4.583305 | -0.384803 | -0.069700 | C               | -3.385960 | -1.526370 | 0.110396  |
| S               | -6.167977 | -0.854726 | -0.089715 | S               | -4.330303 | -0.271091 | -0.455225 |
| <b>Fig. S8c</b> |           |           |           | <b>Fig. S8d</b> |           |           |           |
| N               | -0.934968 | 0.097143  | -0.733208 | N               | -1.735384 | 0.154312  | 0.391712  |
| C               | 0.003593  | -0.848236 | -0.602127 | C               | -1.899857 | -1.045528 | -0.174369 |
| N               | 1.162728  | -0.251045 | -0.317804 | N               | -3.191993 | -1.164717 | -0.504648 |
| C               | 0.973612  | 1.114559  | -0.259938 | C               | -3.875314 | -0.017999 | -0.147755 |
| C               | -0.348865 | 1.335153  | -0.519542 | C               | -2.954017 | 0.815187  | 0.415641  |
| H               | 2.068203  | -0.730440 | -0.164935 | H               | -3.597389 | -1.983536 | -0.943353 |
| C               | -2.366930 | -0.142354 | -0.989546 | C               | -0.444322 | 0.709528  | 0.845210  |
| C               | -3.205946 | -0.009292 | 0.284151  | C               | 0.189930  | 1.615276  | -0.213241 |
| C               | -4.694233 | -0.256979 | 0.006444  | C               | 1.498533  | 2.235474  | 0.292608  |
| C               | -5.550270 | -0.126911 | 1.271424  | C               | 2.174841  | 3.108921  | -0.769848 |
| H               | 1.789820  | 1.787130  | -0.046082 | H               | -4.933878 | 0.098446  | -0.316341 |
| H               | -0.918929 | 2.249151  | -0.575500 | H               | -3.055581 | 1.804614  | 0.832779  |
| H               | -0.153748 | -1.910280 | -0.708841 | H               | -1.106133 | -1.774089 | -0.328623 |
| H               | -2.452867 | -1.144657 | -1.416341 | H               | 0.205731  | -0.137096 | 1.075252  |

|                 |           |           |           |                 |           |           |           |
|-----------------|-----------|-----------|-----------|-----------------|-----------|-----------|-----------|
| H               | -2.682631 | 0.575990  | -1.751086 | H               | -0.641467 | 1.254850  | 1.772086  |
| H               | -3.069015 | 0.994876  | 0.706455  | H               | -0.518606 | 2.407872  | -0.489437 |
| H               | -2.838456 | -0.725236 | 1.031030  | H               | 0.382471  | 1.022360  | -1.116994 |
| H               | -4.821681 | -1.260065 | -0.423992 | H               | 2.181149  | 1.431003  | 0.595750  |
| H               | -5.046071 | 0.455915  | -0.752240 | H               | 1.292446  | 2.836302  | 1.189844  |
| H               | -6.608935 | -0.307078 | 1.051738  | H               | 3.105036  | 3.545487  | -0.387610 |
| H               | -5.462264 | 0.877483  | 1.704613  | H               | 1.519947  | 3.932391  | -1.082892 |
| H               | -5.236670 | -0.849932 | 2.034917  | H               | 2.422583  | 2.519235  | -1.661430 |
| N               | 4.415177  | 1.619282  | 0.599251  | N               | 0.771900  | -2.632007 | -0.345966 |
| C               | 4.364988  | 0.446651  | 0.472268  | C               | 1.826126  | -2.142372 | -0.118293 |
| S               | 4.242311  | -1.209129 | 0.280862  | S               | 3.296032  | -1.445742 | 0.205847  |
| <b>Fig. S8e</b> |           |           |           | <b>Fig. S8f</b> |           |           |           |
| N               | -1.296647 | 0.808603  | 0.484507  | N               | 1.642316  | 0.194269  | 0.390891  |
| C               | -1.824959 | -0.416558 | 0.428398  | C               | 2.844433  | 0.603562  | 0.802923  |
| N               | -3.026091 | -0.320587 | -0.152724 | N               | 3.770502  | -0.083176 | 0.122989  |
| C               | -3.278604 | 0.996484  | -0.484511 | C               | 3.148801  | -0.955162 | -0.749942 |
| C               | -2.185622 | 1.707769  | -0.084382 | C               | 1.805638  | -0.779439 | -0.583349 |
| H               | -3.644794 | -1.105100 | -0.323027 | H               | 4.771097  | 0.024387  | 0.244037  |
| C               | 0.050490  | 1.133709  | 0.994161  | C               | 0.343871  | 0.718083  | 0.860656  |
| C               | 1.046055  | 1.364977  | -0.144759 | C               | -0.346259 | 1.566774  | -0.209165 |
| C               | 2.454730  | 1.643071  | 0.394789  | C               | -1.706116 | 2.080841  | 0.281156  |
| C               | 3.472980  | 1.855037  | -0.731298 | C               | -2.427620 | 2.913053  | -0.784822 |
| H               | -4.194641 | 1.304385  | -0.962541 | H               | 3.705241  | -1.613820 | -1.397246 |
| H               | -1.964992 | 2.761469  | -0.147885 | H               | 0.949660  | -1.244936 | -1.056499 |
| H               | -1.347082 | -1.319129 | 0.783114  | H               | 3.036107  | 1.354180  | 1.553596  |
| H               | 0.364021  | 0.291154  | 1.614525  | H               | 0.543701  | 1.299101  | 1.764615  |
| H               | -0.050586 | 2.018324  | 1.629124  | H               | -0.272148 | -0.142295 | 1.135320  |
| H               | 0.709270  | 2.208857  | -0.761951 | H               | -0.490457 | 0.956168  | -1.108297 |
| H               | 1.059867  | 0.476460  | -0.786441 | H               | 0.303986  | 2.409795  | -0.479571 |
| H               | 2.771272  | 0.798869  | 1.022494  | H               | -1.563898 | 2.685413  | 1.188407  |
| H               | 2.431629  | 2.528701  | 1.045589  | H               | -2.329162 | 1.223024  | 0.566254  |
| H               | 4.473877  | 2.049246  | -0.328398 | H               | -3.395108 | 3.274033  | -0.416567 |
| H               | 3.191961  | 2.708327  | -1.361798 | H               | -2.612447 | 2.317280  | -1.687550 |
| H               | 3.534270  | 0.968470  | -1.374649 | H               | -1.830660 | 3.787055  | -1.076025 |
| N               | 0.348142  | -2.021684 | -1.869231 | N               | -1.187971 | -1.708275 | -1.583824 |
| C               | 0.685677  | -2.263243 | -0.762169 | C               | -1.787067 | -1.814578 | -0.568642 |
| S               | 1.122727  | -2.567615 | 0.815788  | S               | -2.602746 | -1.946744 | 0.872890  |
| <b>Fig. S8g</b> |           |           |           | <b>Fig. S8h</b> |           |           |           |
| N               | 0.037318  | -0.795003 | -0.082032 | N               | -0.594170 | -1.462992 | 0.087342  |
| C               | 0.615751  | -1.631967 | -0.945147 | C               | -1.477186 | -1.546333 | -0.910951 |
| N               | 1.466110  | -2.407449 | -0.264305 | N               | -2.668717 | -1.161780 | -0.442865 |
| C               | 1.444566  | -2.054056 | 1.071163  | C               | -2.549284 | -0.799906 | 0.883206  |



|   |           |           |           |   |           |           |           |
|---|-----------|-----------|-----------|---|-----------|-----------|-----------|
| C | 0.541685  | -1.038223 | 1.183985  | C | -1.241221 | -0.990677 | 1.216742  |
| H | 2.052771  | -3.121595 | -0.679775 | H | -3.515563 | -1.108233 | -0.996587 |
| C | -0.979464 | 0.218525  | -0.417764 | C | 0.846853  | -1.769433 | -0.007342 |
| C | -2.385189 | -0.229175 | -0.009803 | C | 1.703826  | -0.502786 | -0.045145 |
| C | -3.434199 | 0.838215  | -0.347301 | C | 3.198383  | -0.840725 | -0.112416 |
| C | -4.850059 | 0.409024  | 0.054395  | C | 4.071272  | 0.419272  | -0.149304 |
| H | 2.067705  | -2.539132 | 1.804903  | H | -3.386007 | -0.440034 | 1.459631  |
| H | 0.239860  | -0.448258 | 2.033651  | H | -0.715094 | -0.819006 | 2.141464  |
| H | 0.431231  | -1.672287 | -2.006962 | H | -1.267076 | -1.873893 | -1.916727 |
| H | -0.913570 | 0.390631  | -1.494639 | H | 0.987315  | -2.371722 | -0.908358 |
| H | -0.681936 | 1.137488  | 0.092563  | H | 1.095991  | -2.393305 | 0.855884  |
| H | -2.401624 | -0.436345 | 1.068476  | H | 1.495226  | 0.106265  | 0.842145  |
| H | -2.627866 | -1.169841 | -0.522257 | H | 1.410270  | 0.102229  | -0.911425 |
| H | -3.404818 | 1.049327  | -1.425445 | H | 3.397236  | -1.453662 | -1.003127 |
| H | -3.174202 | 1.776448  | 0.161978  | H | 3.474454  | -1.454487 | 0.756865  |
| H | -5.583610 | 1.184242  | -0.195722 | H | 5.136217  | 0.162469  | -0.193425 |
| H | -4.912940 | 0.221509  | 1.133789  | H | 3.908168  | 1.034894  | 0.743957  |
| H | -5.143924 | -0.512611 | -0.463841 | H | 3.835229  | 1.034801  | -1.026366 |
| N | 1.325035  | 2.244920  | 1.356556  | N | -0.037456 | 2.353876  | 1.593576  |
| C | 1.994907  | 1.858550  | 0.461248  | C | -0.471370 | 2.264491  | 0.497114  |
| S | 2.910355  | 1.288612  | -0.805182 | S | -1.077600 | 2.122909  | -1.046358 |

### [BIm][NO<sub>3</sub>]

| <b>Fig. S9a</b> |           |           |           | <b>Fig. S9b</b> |           |           |           |
|-----------------|-----------|-----------|-----------|-----------------|-----------|-----------|-----------|
| N               | 0.916745  | 0.798666  | 0.477499  | N               | -1.067449 | 0.428011  | -0.615934 |
| C               | -0.273281 | 0.187055  | 0.400571  | C               | -0.084546 | -0.468746 | -0.778907 |
| N               | -1.154478 | 1.039288  | -0.123398 | N               | 1.044862  | 0.046282  | -0.291769 |
| C               | -0.522244 | 2.233080  | -0.396350 | C               | 0.790838  | 1.306531  | 0.203049  |
| C               | 0.783418  | 2.084585  | -0.022186 | C               | -0.538872 | 1.549588  | 0.003533  |
| H               | -2.164575 | 0.808772  | -0.277913 | H               | 1.981151  | -0.425331 | -0.290299 |
| C               | 2.170749  | 0.184296  | 0.946844  | C               | -2.485101 | 0.227466  | -0.963556 |
| C               | 3.061998  | -0.262696 | -0.215240 | C               | -3.325453 | -0.156095 | 0.257854  |
| C               | 4.370161  | -0.888882 | 0.284937  | C               | -4.803017 | -0.344766 | -0.108884 |
| C               | 5.270444  | -1.351527 | -0.866305 | C               | -5.655751 | -0.740560 | 1.102150  |
| H               | -1.045110 | 3.075452  | -0.821030 | H               | 1.574565  | 1.903822  | 0.639475  |
| H               | 1.616391  | 2.769119  | -0.059310 | H               | -1.148944 | 2.408104  | 0.237485  |
| H               | -0.495396 | -0.821893 | 0.709320  | H               | -0.193923 | -1.442260 | -1.231594 |
| H               | 1.896489  | -0.662091 | 1.581610  | H               | -2.523896 | -0.550536 | -1.730182 |
| H               | 2.677149  | 0.923631  | 1.573422  | H               | -2.841249 | 1.158440  | -1.412928 |
| H               | 3.284473  | 0.601183  | -0.855547 | H               | -3.229325 | 0.625054  | 1.023350  |
| H               | 2.510922  | -0.985681 | -0.831000 | H               | -2.924594 | -1.081844 | 0.691249  |
| H               | 4.138830  | -1.742472 | 0.937365  | H               | -4.889307 | -1.114942 | -0.888009 |
| H               | 4.909281  | -0.158763 | 0.904703  | H               | -5.191003 | 0.586278  | -0.545197 |

|                 |           |           |           |                 |           |           |           |
|-----------------|-----------|-----------|-----------|-----------------|-----------|-----------|-----------|
| H               | 6.198726  | -1.795036 | -0.487925 | H               | -6.707164 | -0.868715 | 0.819887  |
| H               | 5.539751  | -0.510604 | -1.517942 | H               | -5.608073 | 0.027127  | 1.884791  |
| H               | 4.764152  | -2.104771 | -1.482994 | H               | -5.305997 | -1.685245 | 1.537213  |
| N               | -3.919947 | -0.831565 | -0.081921 | N               | 4.327847  | -0.351399 | 0.241806  |
| O               | -3.801594 | 0.374085  | -0.494822 | O               | 3.508088  | -1.184183 | -0.282062 |
| O               | -2.899889 | -1.428051 | 0.354622  | O               | 5.532018  | -0.661077 | 0.357362  |
| O               | -5.035366 | -1.390663 | -0.118755 | O               | 3.895190  | 0.765170  | 0.629024  |
| <b>Fig. S9c</b> |           |           |           | <b>Fig. S9d</b> |           |           |           |
| N               | 1.624274  | -0.460295 | 0.358736  | N               | -1.556206 | 0.061548  | 0.368343  |
| C               | 1.715205  | 0.735690  | -0.233261 | C               | -1.354057 | -1.102576 | -0.257601 |
| N               | 2.987939  | 0.902768  | -0.614288 | N               | -2.553442 | -1.589391 | -0.601515 |
| C               | 3.733875  | -0.205862 | -0.263285 | C               | -3.549049 | -0.723513 | -0.190596 |
| C               | 2.870196  | -1.067007 | 0.348182  | C               | -2.917184 | 0.320879  | 0.418129  |
| H               | 3.340169  | 1.727899  | -1.085849 | H               | -2.695425 | -2.468923 | -1.084641 |
| C               | 0.372964  | -1.042114 | 0.886785  | C               | -0.484958 | 0.951143  | 0.857151  |
| C               | -0.556259 | -1.508837 | -0.236865 | C               | -0.049239 | 1.960220  | -0.209114 |
| C               | -1.869292 | -2.074367 | 0.319225  | C               | 1.071135  | 2.871210  | 0.308522  |
| C               | -2.817115 | -2.536427 | -0.793326 | C               | 1.533195  | 3.881376  | -0.748041 |
| H               | 4.789112  | -0.280753 | -0.471205 | H               | -4.594832 | -0.925415 | -0.358133 |
| H               | 3.029265  | -2.044453 | 0.775516  | H               | -3.308079 | 1.212784  | 0.882107  |
| H               | 0.886473  | 1.420366  | -0.394486 | H               | -0.382935 | -1.553703 | -0.457392 |
| H               | -0.108982 | -0.272093 | 1.492617  | H               | 0.345558  | 0.307430  | 1.155483  |
| H               | 0.663499  | -1.871208 | 1.536117  | H               | -0.873059 | 1.455099  | 1.746246  |
| H               | -0.043819 | -2.268628 | -0.841966 | H               | -0.912141 | 2.565856  | -0.517413 |
| H               | -0.772841 | -0.658789 | -0.896429 | H               | 0.296528  | 1.414112  | -1.096798 |
| H               | -2.363960 | -1.305288 | 0.927781  | H               | 1.922496  | 2.253283  | 0.625559  |
| H               | -1.649908 | -2.915765 | 0.991654  | H               | 0.721903  | 3.405684  | 1.203136  |
| H               | -3.749063 | -2.937056 | -0.377768 | H               | 2.334750  | 4.520865  | -0.360415 |
| H               | -2.354559 | -3.322420 | -1.403935 | H               | 0.705520  | 4.530678  | -1.060926 |
| H               | -3.075850 | -1.702637 | -1.457984 | H               | 1.913222  | 3.368961  | -1.640894 |
| N               | -1.670689 | 1.922523  | 0.093681  | N               | 2.193515  | -1.882632 | 0.051757  |
| O               | -1.078627 | 1.855905  | 1.208138  | O               | 1.633059  | -1.605813 | 1.149868  |
| O               | -0.983771 | 2.051011  | -0.965989 | O               | 1.478903  | -2.066638 | -0.981315 |
| O               | -2.922309 | 1.851758  | 0.029638  | O               | 3.443084  | -1.973277 | -0.023142 |
| <b>Fig. S9e</b> |           |           |           | <b>Fig. S9f</b> |           |           |           |
| N               | -1.697340 | -0.407796 | 0.334633  | N               | -0.113059 | -1.530228 | 0.194809  |
| C               | -2.921940 | -0.938817 | 0.349366  | C               | -0.831726 | -1.879301 | -0.874241 |
| N               | -3.754913 | -0.071986 | -0.239157 | N               | -2.121297 | -1.665726 | -0.593497 |
| C               | -3.047044 | 1.043568  | -0.644762 | C               | -2.238394 | -1.148111 | 0.679635  |
| C               | -1.747500 | 0.832862  | -0.284326 | C               | -0.971341 | -1.061394 | 1.175743  |
| H               | -4.750595 | -0.220409 | -0.356993 | H               | -2.885516 | -1.828949 | -1.238419 |
| C               | -0.472595 | -1.040602 | 0.862810  | C               | 1.359177  | -1.542767 | 0.283155  |

|   |           |           |           |   |           |           |           |
|---|-----------|-----------|-----------|---|-----------|-----------|-----------|
| C | 0.480386  | -1.453531 | -0.261215 | C | 1.960951  | -0.172218 | -0.034481 |
| C | 1.793197  | -2.016975 | 0.297812  | C | 3.488947  | -0.187603 | 0.095692  |
| C | 2.768794  | -2.418688 | -0.813940 | C | 4.109184  | 1.177675  | -0.223959 |
| H | -3.521885 | 1.874185  | -1.141931 | H | -3.190063 | -0.878928 | 1.106778  |
| H | -0.853133 | 1.431401  | -0.412558 | H | -0.605416 | -0.701973 | 2.123860  |
| H | -3.193359 | -1.896441 | 0.765360  | H | -0.439713 | -2.266888 | -1.801343 |
| H | -0.787793 | -1.901086 | 1.458323  | H | 1.717741  | -2.307595 | -0.410650 |
| H | 0.002168  | -0.308110 | 1.518799  | H | 1.611557  | -1.865547 | 1.297056  |
| H | 0.695908  | -0.579719 | -0.888041 | H | 1.526663  | 0.578804  | 0.635855  |
| H | -0.011861 | -2.199513 | -0.899530 | H | 1.667060  | 0.118391  | -1.050253 |
| H | 1.578166  | -2.886721 | 0.934781  | H | 3.907711  | -0.948827 | -0.578089 |
| H | 2.261973  | -1.260553 | 0.941030  | H | 3.766259  | -0.488407 | 1.116071  |
| H | 3.700162  | -2.819174 | -0.396856 | H | 5.200828  | 1.149718  | -0.126300 |
| H | 3.024452  | -1.553968 | -1.438878 | H | 3.728406  | 1.950528  | 0.455381  |
| H | 2.332239  | -3.187522 | -1.464383 | H | 3.869765  | 1.487635  | -1.249033 |
| N | 1.830101  | 1.770327  | 0.120249  | N | -1.466894 | 1.849922  | -0.133672 |
| O | 1.158682  | 2.016251  | -0.926024 | O | -2.712984 | 1.972931  | 0.037776  |
| O | 3.072791  | 1.592692  | 0.046241  | O | -1.026415 | 1.293408  | -1.177497 |
| O | 1.238382  | 1.694421  | 1.234324  | O | -0.664016 | 2.271983  | 0.744263  |
